# Supplementary material
Source: publisher figshare collection journal article supplement (https://rs.figshare.com/ndownloader/files/22692110)
Supplement: Supplementary file 1 [file 22692110]

Identifier	Peak Nr.	FA	Rt	Area	iso.value	quality	only_together	sample	Treatment	Class	Type	Bulk_C_d13	Bulk_C_q	Genus	Species	Date_IRMS	old	old	FA_qunat [nmol/�mol]	Total FA in fraction [nmol/�mol]
75M_Alfred Burian	6	C14:0	751.8	4.257	-29.151	A		E. Hux cal ?.1	algae	hapto	M	-10.20975844		Emiliana	huxleyi cal	140211	Emiliana	huxleyi cal
75M_Alfred Burian	7	C14:1	828.5	5.425	-25.858	A		E. Hux cal ?.1	algae	hapto	M	-10.20975844		Emiliana	huxleyi cal	140211	Emiliana	huxleyi cal
75M_Alfred Burian	9	C16:0	1074.5	3.389	-30.056	A		E. Hux cal ?.1	algae	hapto	M	-10.20975844		Emiliana	huxleyi cal	140211	Emiliana	huxleyi cal
75M_Alfred Burian	10	C16:1w9/7	1165	5.651	-29.75	T	1	E. Hux cal ?.1	algae	hapto	M	-10.20975844		Emiliana	huxleyi cal	140211	Emiliana	huxleyi cal
75M_Alfred Burian	11	C17:0	1254.2	4.15	-36.357	A		E. Hux cal ?.1	algae	hapto	M	-10.20975844		Emiliana	huxleyi cal	140211	Emiliana	huxleyi cal
75M_Alfred Burian	12	C16:2w4	1322.8	1.683	-29.272	A		E. Hux cal ?.1	algae	hapto	M	-10.20975844		Emiliana	huxleyi cal	140211	Emiliana	huxleyi cal
75M_Alfred Burian	13	C16:3w4	1360.4	1.115	-32.022	A		E. Hux cal ?.1	algae	hapto	M	-10.20975844		Emiliana	huxleyi cal	140211	Emiliana	huxleyi cal
75M_Alfred Burian	14	C16:3w3	1412.6	1.005	-33.572	A		E. Hux cal ?.1	algae	hapto	M	-10.20975844		Emiliana	huxleyi cal	140211	Emiliana	huxleyi cal
75M_Alfred Burian	15	C18:1w9c	1515.5	1.727	-21.494	A		E. Hux cal ?.1	algae	hapto	M	-10.20975844		Emiliana	huxleyi cal	140211	Emiliana	huxleyi cal
75M_Alfred Burian	16	C18:1w7c	1535.1	10.042	-25.304	A		E. Hux cal ?.1	algae	hapto	M	-10.20975844		Emiliana	huxleyi cal	140211	Emiliana	huxleyi cal
75M_Alfred Burian	17	C19:0	1630	9.139	-35.522	A		E. Hux cal ?.1	algae	hapto	M	-10.20975844		Emiliana	huxleyi cal	140211	Emiliana	huxleyi cal
75M_Alfred Burian	18	C18:2w6c	1655.9	1.191	-36.39	C		E. Hux cal ?.1	algae	hapto	M	-10.20975844		Emiliana	huxleyi cal	140211	Emiliana	huxleyi cal
75M_Alfred Burian	19	C18:4w3	1924.3	1.104	-31.552	A		E. Hux cal ?.1	algae	hapto	M	-10.20975844		Emiliana	huxleyi cal	140211	Emiliana	huxleyi cal
75M_Alfred Burian	20	C21:0	1992.8	9.183	-33.843	A		E. Hux cal ?.1	algae	hapto	M	-10.20975844		Emiliana	huxleyi cal	140211	Emiliana	huxleyi cal
75M_Alfred Burian	21	C23:0	2263.3	1.221	-33.418	A		E. Hux cal ?.1	algae	hapto	M	-10.20975844		Emiliana	huxleyi cal	140211	Emiliana	huxleyi cal
75M_Alfred Burian	22	C20:5w3	2269.7	3.981	-29.484	D		E. Hux cal ?.1	algae	hapto	M	-10.20975844		Emiliana	huxleyi cal	140211	Emiliana	huxleyi cal
75M_Alfred Burian	23	C22:6w3	2546.9	1.273	-32.137	A		E. Hux cal ?.1	algae	hapto	M	-10.20975844		Emiliana	huxleyi cal	140211	Emiliana	huxleyi cal
75M_Alfred Burian	+	C18:1w9c	1509	0.5	-27.9	F								Not_iden_rmv	Not_iden_rmv	140211	Dunaliella	tertiolecta
75M_Alfred Burian	9	C18:2w6t	1622.5	4.04	-35.999	F								Not_iden_rmv	Not_iden_rmv	140211	Dunaliella	tertiolecta
75M_Alfred Burian	10	C18:3w3	1821.4	2.962	-41.245	F								Not_iden_rmv	Not_iden_rmv	140211	Dunaliella	tertiolecta
75M_Alfred Burian	11	C21:0	1984.9	3.565	-34.077	F								Not_iden_rmv	Not_iden_rmv	140211	Dunaliella	tertiolecta
8_76M_Alfred Burian	6	C16:0	1078.6	21.668	-26.954	A		Aopsis 1.3	algae	cyano	M	-14.74153671		Anabaenopsis	elenkinii	140211
8_76M_Alfred Burian	7	C16:1w9/7	1161.8	0.97	-28.137	T	1	Aopsis 1.3	algae	cyano	M	-14.74153671		Anabaenopsis	elenkinii	140211
8_76M_Alfred Burian	8	C16:1w5	1186.5	2.417	-30.779	A		Aopsis 1.3	algae	cyano	M	-14.74153671		Anabaenopsis	elenkinii	140211
8_76M_Alfred Burian	9	C17:0	1251.5	3.75	-37.648	A		Aopsis 1.3	algae	cyano	M	-14.74153671		Anabaenopsis	elenkinii	140211
8_76M_Alfred Burian	+	C18:0	1434	0.7	-32.6	B		Aopsis 1.3	algae	cyano	M	-14.74153671		Anabaenopsis	elenkinii	140211
8_76M_Alfred Burian	+	C18:1w9c	1511	0.8	-31.2	B		Aopsis 1.3	algae	cyano	M	-14.74153671		Anabaenopsis	elenkinii	140211
8_76M_Alfred Burian	10	C18:1w7c	1528.2	1.062	-23.618	A		Aopsis 1.3	algae	cyano	M	-14.74153671		Anabaenopsis	elenkinii	140211
8_76M_Alfred Burian	11	C19:0	1627.7	9.646	-36.388	A		Aopsis 1.3	algae	cyano	M	-14.74153671		Anabaenopsis	elenkinii	140211
8_76M_Alfred Burian	12	C18:2w6c	1652.6	1.141	-27.203	A		Aopsis 1.3	algae	cyano	M	-14.74153671		Anabaenopsis	elenkinii	140211
8_76M_Alfred Burian	+	C18:3w6	1750	0.6	-31.2	B		Aopsis 1.3	algae	cyano	M	-14.74153671		Anabaenopsis	elenkinii	140211
8_76M_Alfred Burian	13	C18:3w3	1822.9	4.795	-30.204	A		Aopsis 1.3	algae	cyano	M	-14.74153671		Anabaenopsis	elenkinii	140211
8_76M_Alfred Burian	14	C18:4w3	1922.4	4.118	-32.778	A		Aopsis 1.3	algae	cyano	M	-14.74153671		Anabaenopsis	elenkinii	140211
8_76M_Alfred Burian	15	C21:0	1990.3	11.202	-33.486	A		Aopsis 1.3	algae	cyano	M	-14.74153671		Anabaenopsis	elenkinii	140211
8_76M_Alfred Burian	16	C23:0	2259.7	2.807	-36.413	A		Aopsis 1.3	algae	cyano	M	-14.74153671		Anabaenopsis	elenkinii	140211
17_59M_Alfred Burian	5	C18:1w9c	1510.7	3.845	-44.076	F		Sel second take 2	algae	green	M	-15.29683479		Selenastrum		140211
17_59M_Alfred Burian	6	C18:3w3	1821.9	4.26	-45.772	F		Sel second take 2	algae	green	M	-15.29683479		Selenastrum		140211
10_M63_Alfred Burian (2nd mm)	5	C14:0	750.1	1.728	-29.117	F		E. Hux cal 1.1	algae	hapto	M	-10.20975844		Emiliana	huxleyi cal	140211	Chaetocerus	old
10_M63_Alfred Burian (2nd mm)	6	C14:1	825.8	1.963	-25.601	F		E. Hux cal 1.1	algae	hapto	M	-10.20975844		Emiliana	huxleyi cal	140211	Chaetocerus	old
10_M63_Alfred Burian (2nd mm)	8	C16:0	1072.2	3.782	-32.517	F		E. Hux cal 1.1	algae	hapto	M	-10.20975844		Emiliana	huxleyi cal	140211	Chaetocerus	old
10_M63_Alfred Burian (2nd mm)	+	C16:1w9/7	1160	0.8	-28.59	F	1	E. Hux cal 1.1	algae	hapto	M	-10.20975844		Emiliana	huxleyi cal	140211	Chaetocerus	old
10_M63_Alfred Burian (2nd mm)	9	C17:0	1250.4	2.997	-38.304	F		E. Hux cal 1.1	algae	hapto	M	-10.20975844		Emiliana	huxleyi cal	140211	Chaetocerus	old
10_M63_Alfred Burian (2nd mm)	10	C18:0	1434.8	1.681	-34.779	F		E. Hux cal 1.1	algae	hapto	M	-10.20975844		Emiliana	huxleyi cal	140211	Chaetocerus	old
10_M63_Alfred Burian (2nd mm)	+	C16:4w1	1459	0.3	-27.8	F		E. Hux cal 1.1	algae	hapto	M	-10.20975844		Emiliana	huxleyi cal	140211	Chaetocerus	old
10_M63_Alfred Burian (2nd mm)	11	C18:1w9c	1512.1	1.596	-29.645	F		E. Hux cal 1.1	algae	hapto	M	-10.20975844		Emiliana	huxleyi cal	140211	Chaetocerus	old
10_M63_Alfred Burian (2nd mm)	12	C18:1w7c	1529	3.023	-22.815	F		E. Hux cal 1.1	algae	hapto	M	-10.20975844		Emiliana	huxleyi cal	140211	Chaetocerus	old
10_M63_Alfred Burian (2nd mm)	+	C18:4w3	1920	0.79	-35.06	F		E. Hux cal 1.1	algae	hapto	M	-10.20975844		Emiliana	huxleyi cal	140211	Chaetocerus	old
10_M63_Alfred Burian (2nd mm)	13	C19:0	1626	8.463	-35.989	F		E. Hux cal 1.1	algae	hapto	M	-10.20975844		Emiliana	huxleyi cal	140211	Chaetocerus	old
10_M63_Alfred Burian (2nd mm)	14	C21:0	1989.9	9.622	-33.844	F		E. Hux cal 1.1	algae	hapto	M	-10.20975844		Emiliana	huxleyi cal	140211	Chaetocerus	old
10_M63_Alfred Burian (2nd mm)	15	C20:5w3	2259.9	0.856	-37.15	F		E. Hux cal 1.1	algae	hapto	M	-10.20975844		Emiliana	huxleyi cal	140211	Chaetocerus	old
10_M63_Alfred Burian (2nd mm)	16	C22:6w3	2544.6	0.876	-26.521	F		E. Hux cal 1.1	algae	hapto	M	-10.20975844		Emiliana	huxleyi cal	140211	Chaetocerus	old
14_65M_Alfred Burian	5	C16:0	1083	38.595	-47.239	A		D. Sal 2.1	algae	green	M	-31.58043364		Dunaliella	salina	140211
14_65M_Alfred Burian	6	C16:1w9/7	1171	7.575	-45.115	T	1	D. Sal 2.1	algae	green	M	-31.58043364		Dunaliella	salina	140211
14_65M_Alfred Burian	7	C17:0	1253.6	3.329	-37.627	A		D. Sal 2.1	algae	green	M	-31.58043364		Dunaliella	salina	140211
14_65M_Alfred Burian	8	C16:2w6	1280.5	5.451	-42.06	A		D. Sal 2.1	algae	green	M	-31.58043364		Dunaliella	salina	140211
14_65M_Alfred Burian	9	C16:3w4	1342.4	2.675	-53.37	C		D. Sal 2.1	algae	green	M	-31.58043364		Dunaliella	salina	140211
14_65M_Alfred Burian	10	C16:4w3	1446.1	9.032	-45.576	A		D. Sal 2.1	algae	green	M	-31.58043364		Dunaliella	salina	140211
14_65M_Alfred Burian	11	C18:1w9c	1513.8	16.21	-47.257	E		D. Sal 2.1	algae	green	M	-31.58043364		Dunaliella	salina	140211
14_65M_Alfred Burian	12	C18:1w7c	1534.3	6.855	-39.997	E		D. Sal 2.1	algae	green	M	-31.58043364		Dunaliella	salina	140211
14_65M_Alfred Burian	16	C18:1w7c/9		23.065	-45.3	T	E	D. Sal 2.1	algae	green	M	-31.58043364		Dunaliella	salina	140211
14_65M_Alfred Burian	13	C18:2w6t	1620.2	1.92	-48.759	E		D. Sal 2.1	algae	green	M	-31.58043364		Dunaliella	salina	140211
14_65M_Alfred Burian	14	C19:0	1635.8	8.629	-36.959	A		D. Sal 2.1	algae	green	M	-31.58043364		Dunaliella	salina	140211
14_65M_Alfred Burian	15	C18:2w6c	1662	23.935	-39.936	A		D. Sal 2.1	algae	green	M	-31.58043364		Dunaliella	salina	140211
14_65M_Alfred Burian	16	C18:3w6	1758.5	20.867	-55.847	A		D. Sal 2.1	algae	green	M	-31.58043364		Dunaliella	salina	140211
14_65M_Alfred Burian	17	C18:3w3	1837.5	66.098	-49.32	A		D. Sal 2.1	algae	green	M	-31.58043364		Dunaliella	salina	140211
14_65M_Alfred Burian	18	C18:4w3	1924.1	1.978	-60.243	A		D. Sal 2.1	algae	green	M	-31.58043364		Dunaliella	salina	140211
14_65M_Alfred Burian	19	C21:0	1989.9	7.267	-35.126	A		D. Sal 2.1	algae	green	M	-31.58043364		Dunaliella	salina	140211
14_65M_Alfred Burian	20	C23:0	2261.4	1.349	-37.101	A		D. Sal 2.1	algae	green	M	-31.58043364		Dunaliella	salina	140211
12_M45_Alfred Burian	5	C14:0	753.9	14.782	-28.077	A		Gcapsa 2.1	algae	hapto	M	-11.3776097		Gephyrocapsa	oceanica	140212
12_M45_Alfred Burian	6	C14:1	827	0.911	-25.736	A		Gcapsa 2.1	algae	hapto	M	-11.3776097		Gephyrocapsa	oceanica	140212
12_M45_Alfred Burian	8	C16:0	1077	10.604	-29.781	A		Gcapsa 2.1	algae	hapto	M	-11.3776097		Gephyrocapsa	oceanica	140212
12_M45_Alfred Burian	9	C16:1w9/7	1163.5	2.243	-29.69	T	1	Gcapsa 2.1	algae	hapto	M	-11.3776097		Gephyrocapsa	oceanica	140212
12_M45_Alfred Burian	10	C17:0	1254	4.884	-36.87	A		Gcapsa 2.1	algae	hapto	M	-11.3776097		Gephyrocapsa	oceanica	140212
12_M45_Alfred Burian	11	C18:0	1440.6	2.703	-29.417	A		Gcapsa 2.1	algae	hapto	M	-11.3776097		Gephyrocapsa	oceanica	140212
12_M45_Alfred Burian	12	C18:1w9c	1520.5	14.059	-29.51	E		Gcapsa 2.1	algae	hapto	M	-11.3776097		Gephyrocapsa	oceanica	140212
12_M45_Alfred Burian	13	C18:1w7c	1535.9	8.953	-27.281	E		Gcapsa 2.1	algae	hapto	M	-11.3776097		Gephyrocapsa	oceanica	140212
12_M45_Alfred Burian		C18:1w7c/9		23.012	-28.65	T	E	Gcapsa 2.1	algae	hapto	M	-11.3776097		Gephyrocapsa	oceanica	140212
12_M45_Alfred Burian		C18:1w5	1588	0.8	-31.03	A		Gcapsa 2.1	algae	hapto	M	-11.3776097		Gephyrocapsa	oceanica	140212
12_M45_Alfred Burian	14	C19:0	1630.8	10.992	-36.233	A		Gcapsa 2.1	algae	hapto	M	-11.3776097		Gephyrocapsa	oceanica	140212
12_M45_Alfred Burian	15	C18:2w6c	1657.4	4.561	-30.183	A		Gcapsa 2.1	algae	hapto	M	-11.3776097		Gephyrocapsa	oceanica	140212
12_M45_Alfred Burian	16	C18:3w3	1824.4	2.188	-28.885	A		Gcapsa 2.1	algae	hapto	M	-11.3776097		Gephyrocapsa	oceanica	140212
12_M45_Alfred Burian	17	C18:4w3	1924.1	1.557	-31.193	A		Gcapsa 2.1	algae	hapto	M	-11.3776097		Gephyrocapsa	oceanica	140212
12_M45_Alfred Burian	18	C21:0	1992.8	10.401	-32.696	A		Gcapsa 2.1	algae	hapto	M	-11.3776097		Gephyrocapsa	oceanica	140212
12_M45_Alfred Burian	19	C23:0	2265.4	3.69	-34.55	A		Gcapsa 2.1	algae	hapto	M	-11.3776097		Gephyrocapsa	oceanica	140212
12_M45_Alfred Burian	20	C22:5w6	2441.1	3.644	-29.5	A		Gcapsa 2.1	algae	hapto	M	-11.3776097		Gephyrocapsa	oceanica	140212
12_M45_Alfred Burian	21	C22:6w3	2549.2	13.275	-29.7	A		Gcapsa 2.1	algae	hapto	M	-11.3776097		Gephyrocapsa	oceanica	140212
13_M56_Alfred Burian	6	C14:0	749.9	1.738	-37.415	A		Phae 1.1	algae	diatom	M	-26.33934676		Phaeodactylum	tricornutum	140212	Pseudkirchneriella	subcapitata
13_M56_Alfred Burian	7	C16:0	1075.1	10.907	-37.039	A		Phae 1.1	algae	diatom	M	-26.33934676		Phaeodactylum	tricornutum	140212	Pseudkirchneriella	subcapitata
13_M56_Alfred Burian	8	C16:1w9/7	1163.1	7.134	-38.431	T	1	Phae 1.1	algae	diatom	M	-26.33934676		Phaeodactylum	tricornutum	140212	Pseudkirchneriella	subcapitata
13_M56_Alfred Burian	9	C17:0	1251.7	3.644	-36.293	E		Phae 1.1	algae	diatom	M	-26.33934676		Phaeodactylum	tricornutum	140212	Pseudkirchneriella	subcapitata
13_M56_Alfred Burian	10	C16:2w7	1263.6	1.28	-30.765	E		Phae 1.1	algae	diatom	M	-26.33934676		Phaeodactylum	tricornutum	140212	Pseudkirchneriella	subcapitata
13_M56_Alfred Burian		C16:2w7/C17		4.924	-35.1	T	E	Phae 1.1	algae	diatom	M	-26.33934676		Phaeodactylum	tricornutum	140212	Pseudkirchneriella	subcapitata
13_M56_Alfred Burian	11	C16:2w4	1320	1.415	-39.932	A		Phae 1.1	algae	diatom	M	-26.33934676		Phaeodactylum	tricornutum	140212	Pseudkirchneriella	subcapitata
13_M56_Alfred Burian	12	C16:3w3	1423.9	4.892	-41.592	B		Phae 1.1	algae	diatom	M	-26.33934676		Phaeodactylum	tricornutum	140212	Pseudkirchneriella	subcapitata
13_M56_Alfred Burian		C18:0	1434	1.2	-32.1	B		Phae 1.1	algae	diatom	M	-26.33934676		Phaeodactylum	tricornutum	140212	Pseudkirchneriella	subcapitata
13_M56_Alfred Burian	14	C16:4w3	1443.6	1.423	-36.7	B		Phae 1.1	algae	diatom	M	-26.33934676		Phaeodactylum	tricornutum	140212	Pseudkirchneriella	subcapitata
13_M56_Alfred Burian	15	C18:1w9c	1511.3	6.118	-41.08	A		Phae 1.1	algae	diatom	M	-26.33934676		Phaeodactylum	tricornutum	140212	Pseudkirchneriella	subcapitata
13_M56_Alfred Burian		C18:1w7c	1527	0.7	-25.4	D		Phae 1.1	algae	diatom	M	-26.33934676		Phaeodactylum	tricornutum	140212	Pseudkirchneriella	subcapitata
13_M56_Alfred Burian	16	C19:0	1628.1	9.083	-36.325	A		Phae 1.1	algae	diatom	M	-26.33934676		Phaeodactylum	tricornutum	140212	Pseudkirchneriella	subcapitata
13_M56_Alfred Burian	17	C18:2w6c	1652.8	1.911	-39.2	A		Phae 1.1	algae	diatom	M	-26.33934676		Phaeodactylum	tricornutum	140212	Pseudkirchneriella	subcapitata
13_M56_Alfred Burian	18	C18:3w6	1750.4	1.682	-46.168	A		Phae 1.1	algae	diatom	M	-26.33934676		Phaeodactylum	tricornutum	140212	Pseudkirchneriella	subcapitata
13_M56_Alfred Burian	19	C18:3w3	1826.9	19.126	-40.431	A		Phae 1.1	algae	diatom	M	-26.33934676		Phaeodactylum	tricornutum	140212	Pseudkirchneriella	subcapitata
13_M56_Alfred Burian	20	C18:4w3	1921.3	1.14	-49.438	A		Phae 1.1	algae	diatom	M	-26.33934676		Phaeodactylum	tricornutum	140212	Pseudkirchneriella	subcapitata
13_M56_Alfred Burian	21	C21:0	1990.9	10.57	-33.336	A		Phae 1.1	algae	diatom	M	-26.33934676		Phaeodactylum	tricornutum	140212	Pseudkirchneriella	subcapitata
13_M56_Alfred Burian	22	C20:3w3+C20:4w6+C22:0	2141.6	1.571	-45.097	A		Phae 1.1	algae	diatom	M	-26.33934676		Phaeodactylum	tricornutum	140212	Pseudkirchneriella	subcapitata
13_M56_Alfred Burian	24	C20:5w3	2268.5	9.246	-41.158	A		Phae 1.1	algae	diatom	M	-26.33934676		Phaeodactylum	tricornutum	140212	Pseudkirchneriella	subcapitata
13_M56_Alfred Burian		C22:5w3	2503	0.6	-48.77	B		Phae 1.1	algae	diatom	M	-26.33934676		Phaeodactylum	tricornutum	140212	Pseudkirchneriella	subcapitata
15_M22_Alfred Burian	5	C16:0	1078.2	12.219	-32.289	A		Leptolyng 2.1	algae	cyano	M	-19.05753679		Leptolyngbia		140212
15_M22_Alfred Burian	6	C16:1w9/7	1166.4	8.751	-33.444	T	1	Leptolyng 2.1	algae	cyano	M	-19.05753679		Leptolyngbia		140212
15_M22_Alfred Burian	7	C17:0	1253.2	2.604	-37.129	A		Leptolyng 2.1	algae	cyano	M	-19.05753679		Leptolyngbia		140212
15_M22_Alfred Burian		C18:0	1437	0.6	-35.9	A		Leptolyng 2.1	algae	cyano	M	-19.05753679		Leptolyngbia		140212
15_M22_Alfred Burian	8	C18:1w9c	1515	1.291	-27.737	B		Leptolyng 2.1	algae	cyano	M	-19.05753679		Leptolyngbia		140212
15_M22_Alfred Burian	9	C18:1w7c	1532.8	4.158	-27.809	A		Leptolyng 2.1	algae	cyano	M	-19.05753679		Leptolyngbia		140212
15_M22_Alfred Burian		C18:1w5	1587	0.5	-31.8	A		Leptolyng 2.1	algae	cyano	M	-19.05753679		Leptolyngbia		140212
15_M22_Alfred Burian	10	C19:0	1631.5	9.35	-35.671	A		Leptolyng 2.1	algae	cyano	M	-19.05753679		Leptolyngbia		140212
15_M22_Alfred Burian	11	C18:2w6c	1657.6	5.351	-32.656	A		Leptolyng 2.1	algae	cyano	M	-19.05753679		Leptolyngbia		140212
15_M22_Alfred Burian	12	C18:3w3	1828.5	12.707	-36.091	A		Leptolyng 2.1	algae	cyano	M	-19.05753679		Leptolyngbia		140212
15_M22_Alfred Burian	13	C21:0	1992.8	9.452	-32.676	A		Leptolyng 2.1	algae	cyano	M	-19.05753679		Leptolyngbia		140212
15_M22_Alfred Burian	14	C23:0	2263.3	1.601	-35.371	A		Leptolyng 2.1	algae	cyano	M	-19.05753679		Leptolyngbia		140212
16_M64_Alfred Burian	5	C16:0	1077.2	16.888	-35.56	A		Ana Kiel B+A	algae	cyano	T	-19.34		Anabaena	Kiel	140212
16_M64_Alfred Burian	6	C16:1w9/7	1163.9	8.136	-31.519	T	1	Ana Kiel B+A	algae	cyano	T	-19.34		Anabaena	Kiel	140212
16_M64_Alfred Burian	7	C17:0	1250.9	2.964	-36.393	E		Ana Kiel B+A	algae	cyano	T	-19.34		Anabaena	Kiel	140212
16_M64_Alfred Burian		C16:2w7	1263	0.77	-26.87	E		Ana Kiel B+A	algae	cyano	T	-19.34		Anabaena	Kiel	140212
16_M64_Alfred Burian	8	C16:2w7/C17	1436	1.385	-34.68	T	E	Ana Kiel B+A	algae	cyano	T	-19.34		Anabaena	Kiel	140212
16_M64_Alfred Burian	8	C18:0	1436	2.155	-33.586	A		Ana Kiel B+A	algae	cyano	T	-19.34		Anabaena	Kiel	140212
16_M64_Alfred Burian	9	C18:1w9c	1513.8	4.001	-36.813	B		Ana Kiel B+A	algae	cyano	T	-19.34		Anabaena	Kiel	140212
16_M64_Alfred Burian	10	C18:1w7c	1532.4	8.345	-28.229	B		Ana Kiel B+A	algae	cyano	T	-19.34		Anabaena	Kiel	140212
16_M64_Alfred Burian	11	C19:0	1627.3	8.502	-36.66	A		Ana Kiel B+A	algae	cyano	T	-19.34		Anabaena	Kiel	140212
16_M64_Alfred Burian	12	C18:2w6c	1654.9	5.945	-34.611	A		Ana Kiel B+A	algae	cyano	T	-19.34		Anabaena	Kiel	140212
16_M64_Alfred Burian	13	C18:3w3	1823.7	7.129	-33.005	A		Ana Kiel B+A	algae	cyano	T	-19.34		Anabaena	Kiel	140212
16_M64_Alfred Burian	14	C21:0	1989.3	8.313	-33.889	A		Ana Kiel B+A	algae	cyano	T	-19.34		Anabaena	Kiel	140212
19_M46_Alfred Burian	5	C14:0	752	10.053	-28.474	A		E. Hux naked 1.1	algae	hapto	M	-18.06304312		Emiliana	huxleyi naked	140212
19_M46_Alfred Burian	6	C14:1	826.2	1.339	-26.042	A		E. Hux naked 1.1	algae	hapto	M	-18.06304312		Emiliana	huxleyi naked	140212
19_M46_Alfred Burian	7	C16:0	1072.4	3.446	-29.903	A		E. Hux naked 1.1	algae	hapto	M	-18.06304312		Emiliana	huxleyi naked	140212
19_M46_Alfred Burian		C16:1w9/7	1160	0.4	-28.5	T	1	E. Hux naked 1.1	algae	hapto	M	-18.06304312		Emiliana	huxleyi naked	140212
19_M46_Alfred Burian	8	C17:0	1250	2.302	-34.851	A		E. Hux naked 1.1	algae	hapto	M	-18.06304312		Emiliana	huxleyi naked	140212
19_M46_Alfred Burian		C18:0	1434	0.4	-30.91	A		E. Hux naked 1.1	algae	hapto	M	-18.06304312		Emiliana	huxleyi naked	140212
19_M46_Alfred Burian		C16:4w1	1460	0.36	-32.7	A		E. Hux naked 1.1	algae	hapto	M	-18.06304312		Emiliana	huxleyi naked	140212
19_M46_Alfred Burian	9	C18:1w9c	1513.8	5.123	-28.644	E		E. Hux naked 1.1	algae	hapto	M	-18.06304312		Emiliana	huxleyi naked	140212
19_M46_Alfred Burian	10	C18:1w7c	1529.5	2.903	-27.049	E		E. Hux naked 1.1	algae	hapto	M	-18.06304312		Emiliana	huxleyi naked	140212
19_M46_Alfred Burian		C18:1w7c/9		8.026	-28.03	T	E	E. Hux naked 1.1	algae	hapto	M	-18.06304312		Emiliana	huxleyi naked	140212
19_M46_Alfred Burian	11	C19:0	1624.3	4.745	-36.015	A		E. Hux naked 1.1	algae	hapto	M	-18.06304312		Emiliana	huxleyi naked	140212
19_M46_Alfred Burian	12	C18:2w6c	1652.4	1.029	-31.669	A		E. Hux naked 1.1	algae	hapto	M	-18.06304312		Emiliana	huxleyi naked	140212
19_M46_Alfred Burian	13	C18:3w3	1821.6	2.319	-31.251	A		E. Hux naked 1.1	algae	hapto	M	-18.06304312		Emiliana	huxleyi naked	140212
19_M46_Alfred Burian	14	C18:4w3	1922.8	6.427	-31.27	A		E. Hux naked 1.1	algae	hapto	M	-18.06304312		Emiliana	huxleyi naked	140212
19_M46_Alfred Burian	15	C21:0	1986.8	4.392	-34.189	A		E. Hux naked 1.1	algae	hapto	M	-18.06304312		Emiliana	huxleyi naked	140212
19_M46_Alfred Burian	16	C18:5w3	2036.3	5.808	-33.484	A		E. Hux naked 1.1	algae	hapto	M	-18.06304312		Emiliana	huxleyi naked	140212
19_M46_Alfred Burian	17	C22:0	2149.8	1.972	-36.317	A		E. Hux naked 1.1	algae	hapto	M	-18.06304312		Emiliana	huxleyi naked	140212
19_M46_Alfred Burian	18	C20:5w3	2261.6	1.119	-35.702	A		E. Hux naked 1.1	algae	hapto	M	-18.06304312		Emiliana	huxleyi naked	140212
19_M46_Alfred Burian	19	C22:6w3	2548.1	17.232	-28.863	A		E. Hux naked 1.1	algae	hapto	M	-18.06304312		Emiliana	huxleyi naked	140212
11_M29_Alfred Burian	5	C16:0	1087	52.175	-30.902	B		Chlamy 1.1	algae	green	M	-20.35215191		Chlamydomonas	reinhardtii	140213
11_M29_Alfred Burian	6	C16:1w13	1149.7	1.097	-30.207	A		Chlamy 1.1	algae	green	M	-20.35215191		Chlamydomonas	reinhardtii	140213
11_M29_Alfred Burian	7	C16:1w9/7	1172.9	6.457	-31.673	T	1	Chlamy 1.1	algae	green	M	-20.35215191		Chlamydomonas	reinhardtii	140213
11_M29_Alfred Burian	8	C16:1w5	1216	0.841	-34.481	A		Chlamy 1.1	algae	green	M	-20.35215191		Chlamydomonas	reinhardtii	140213
11_M29_Alfred Burian	9	C17:0	1255.3	2.573	-36.792	A		Chlamy 1.1	algae	green	M	-20.35215191		Chlamydomonas	reinhardtii	140213
11_M29_Alfred Burian	10	C16:2w6	1281.8	2.092	-32.775	A		Chlamy 1.1	algae	green	M	-20.35215191		Chlamydomonas	reinhardtii	140213
11_M29_Alfred Burian	11	C16:4w3	1447.3	9.211	-31.888	A		Chlamy 1.1	algae	green	M	-20.35215191		Chlamydomonas	reinhardtii	140213
11_M29_Alfred Burian	12	C18:1w9c	1515.3	8.865	-32.624	E		Chlamy 1.1	algae	green	M	-20.35215191		Chlamydomonas	reinhardtii	140213
11_M29_Alfred Burian	13	C18:1w7c	1538.7	14.53	-30.296	E		Chlamy 1.1	algae	green	M	-20.35215191		Chlamydomonas	reinhardtii	140213
11_M29_Alfred Burian	13	C18:1w7c/9	1538.7	23.395	-31.3	T	E	Chlamy 1.1	algae	green	M	-20.35215191		Chlamydomonas	reinhardtii	140213
11_M29_Alfred Burian	14	C19:0	1633.3	4.745	-38.778	A		Chlamy 1.1	algae	green	M	-20.35215191		Chlamydomonas	reinhardtii	140213
11_M29_Alfred Burian	15	C18:2w6c	1662.2	13.905	-32.479	A		Chlamy 1.1	algae	green	M	-20.35215191		Chlamydomonas	reinhardtii	140213
11_M29_Alfred Burian	16	C18:2w4	1723.4	16.474	-33.246	A		Chlamy 1.1	algae	green	M	-20.35215191		Chlamydomonas	reinhardtii	140213
11_M29_Alfred Burian	17	C18:3w3	1835.2	38.849	-32.541	A		Chlamy 1.1	algae	green	M	-20.35215191		Chlamydomonas	reinhardtii	140213
11_M29_Alfred Burian	18	C20:1w9	1893.7	6.386	-34.826	A		Chlamy 1.1	algae	green	M	-20.35215191		Chlamydomonas	reinhardtii	140213
11_M29_Alfred Burian	19	C21:0	1990.9	4.713	-35.545	A		Chlamy 1.1	algae	green	M	-20.35215191		Chlamydomonas	reinhardtii	140213
11_M29_Alfred Burian	20	C23:0	2264.1	1.336	-36.544	A		Chlamy 1.1	algae	green	M	-20.35215191		Chlamydomonas	reinhardtii	140213
20_M44_Alfred Burian	5	C14:0	753.2	15.299	-27.972	A		Gcapsa 1.1	algae	hapto	M	-11.3776097		Gephyrocapsa	oceanica	140213
20_M44_Alfred Burian	7	C16:0	1075.1	8.32	-30.182	A		Gcapsa 1.1	algae	hapto	M	-11.3776097		Gephyrocapsa	oceanica	140213
20_M44_Alfred Burian	8	C16:1w9/7	1161.6	1.51	-30.293	T	1	Gcapsa 1.1	algae	hapto	M	-11.3776097		Gephyrocapsa	oceanica	140213
20_M44_Alfred Burian	9	C17:0	1252.1	4.321	-37.05	B		Gcapsa 1.1	algae	hapto	M	-11.3776097		Gephyrocapsa	oceanica	140213
20_M44_Alfred Burian	10	C18:0	1438.1	2.247	-31.666	A		Gcapsa 1.1	algae	hapto	M	-11.3776097		Gephyrocapsa	oceanica	140213
20_M44_Alfred Burian	11	C18:1w9c	1517.1	10.085	-29.966	E		Gcapsa 1.1	algae	hapto	M	-11.3776097		Gephyrocapsa	oceanica	140213
20_M44_Alfred Burian	12	C18:1w7c	1532.4	5.828	-26.63	E		Gcapsa 1.1	algae	hapto	M	-11.3776097		Gephyrocapsa	oceanica	140213
20_M44_Alfred Burian		C18:1w7c/9		15.913	-28.6	T	E	Gcapsa 1.1	algae	hapto	M	-11.3776097		Gephyrocapsa	oceanica	140213
20_M44_Alfred Burian		C18:1w5	1586	0.5	-36.9	C		Gcapsa 1.1	algae	hapto	M	-11.3776097		Gephyrocapsa	oceanica	140213
20_M44_Alfred Burian	13	C18:2w6c	1654	3.398	-30.716	A		Gcapsa 1.1	algae	hapto	M	-11.3776097		Gephyrocapsa	oceanica	140213
20_M44_Alfred Burian	14	C18:3w3	1821.4	1.27	-31.738	A		Gcapsa 1.1	algae	hapto	M	-11.3776097		Gephyrocapsa	oceanica	140213
20_M44_Alfred Burian		C18:4w3	1921	0.95	-33.75	A		Gcapsa 1.1	algae	hapto	M	-11.3776097		Gephyrocapsa	oceanica	140213
20_M44_Alfred Burian	15	C21:0	1993.9	15.491	-32.63	A		Gcapsa 1.1	algae	hapto	M	-11.3776097		Gephyrocapsa	oceanica	140213
20_M44_Alfred Burian		C18:5w3	2035	0.35	-29.8	A		Gcapsa 1.1	algae	hapto	M	-11.3776097		Gephyrocapsa	oceanica	140213
20_M44_Alfred Burian		C22:0	2133	1	-29.99	A		Gcapsa 1.1	algae	hapto	M	-11.3776097		Gephyrocapsa	oceanica	140213
20_M44_Alfred Burian	16	C23:0	2263.9	2.813	-35.941	A		Gcapsa 1.1	algae	hapto	M	-11.3776097		Gephyrocapsa	oceanica	140213
20_M44_Alfred Burian	17	C22:5w6	2439.2	2.228	-29.555	A		Gcapsa 1.1	algae	hapto	M	-11.3776097		Gephyrocapsa	oceanica	140213
20_M44_Alfred Burian	18	C22:6w3	2546.5	7.264	-30.638	A		Gcapsa 1.1	algae	hapto	M	-11.3776097		Gephyrocapsa	oceanica	140213
23_M51_Alfred Burian	5	C16:0	1077.8	17.462	-35.716	A		Tetra 2.1	algae	green	M	-22.91531202		Tetraselmis	suecica	140213
23_M51_Alfred Burian		C16:1w13	1145	0.49	-34.3	A		Tetra 2.1	algae	green	M	-22.91531202		Tetraselmis	suecica	140213
23_M51_Alfred Burian		C16:1w9/7	1162	1.4	-33.6	F		Tetra 2.1	algae	green	M	-22.91531202		Tetraselmis	suecica	140213
23_M51_Alfred Burian	6	C17:0	1251.7	2.913	-36.25	A		Tetra 2.1	algae	green	M	-22.91531202		Tetraselmis	suecica	140213
23_M51_Alfred Burian		C18:0	1436	0.73	-34.1	E		Tetra 2.1	algae	green	M	-22.91531202		Tetraselmis	suecica	140213
23_M51_Alfred Burian		C16:4w3	1443	1.06	-42.2	E		Tetra 2.1	algae	green	M	-22.91531202		Tetraselmis	suecica	140213
23_M51_Alfred Burian		C16:4w3/C18:0		1.79	-38.8	T	E	Tetra 2.1	algae	green	M	-22.91531202		Tetraselmis	suecica	140213
23_M51_Alfred Burian	7	C18:1w9c	1512.5	10.818	-39.015	E		Tetra 2.1	algae	green	M	-22.91531202		Tetraselmis	suecica	140213
23_M51_Alfred Burian	8	C18:1w7c	1530.5	3.481	-35.645	E		Tetra 2.1	algae	green	M	-22.91531202		Tetraselmis	suecica	140213
23_M51_Alfred Burian		C18:1w7c/9		14.299	-38.197	T	E	Tetra 2.1	algae	green	M	-22.91531202		Tetraselmis	suecica	140213
23_M51_Alfred Burian	9	C19:0	1628.9	9.198	-36.533	A		Tetra 2.1	algae	green	M	-22.91531202		Tetraselmis	suecica	140213
23_M51_Alfred Burian	10	C18:2w6c	1654	2.816	-39.245	A		Tetra 2.1	algae	green	M	-22.91531202		Tetraselmis	suecica	140213
23_M51_Alfred Burian	11	C18:3w6	1751.4	2.251	-38.203	A		Tetra 2.1	algae	green	M	-22.91531202		Tetraselmis	suecica	140213
23_M51_Alfred Burian	12	C18:3w3	1825.2	10.421	-42.101	A		Tetra 2.1	algae	green	M	-22.91531202		Tetraselmis	suecica	140213
23_M51_Alfred Burian	13	C20:1w9	1882.7	1.044	-44.729	A		Tetra 2.1	algae	green	M	-22.91531202		Tetraselmis	suecica	140213
23_M51_Alfred Burian	14	C18:4w3	1922.8	4.218	-43.805	A		Tetra 2.1	algae	green	M	-22.91531202		Tetraselmis	suecica	140213
23_M51_Alfred Burian	15	C21:0	1991.6	9.638	-34.167	A		Tetra 2.1	algae	green	M	-22.91531202		Tetraselmis	suecica	140213
23_M51_Alfred Burian	16	C20:5w3	2268.5	8.464	-36.809	A		Tetra 2.1	algae	green	M	-22.91531202		Tetraselmis	suecica	140213
21_M50_Alfred Burian	5	C16:0	1080.9	27.241	-36.14	A		Tetra 1.1	algae	green	M	-22.91531202		Tetraselmis	suecica	140213
21_M50_Alfred Burian		C16:1w13	1146	0.6	-43.5	C		Tetra 1.1	algae	green	M	-22.91531202		Tetraselmis	suecica	140213
21_M50_Alfred Burian	6	C16:1w9/7	1167.9	2.552	-36.161	T	1	Tetra 1.1	algae	green	M	-22.91531202		Tetraselmis	suecica	140213
21_M50_Alfred Burian	7	C17:0	1253.6	4.697	-36.846	A		Tetra 1.1	algae	green	M	-22.91531202		Tetraselmis	suecica	140213
21_M50_Alfred Burian	8	C16:4w3	1444.2	2.663	-39.031	B		Tetra 1.1	algae	green	M	-22.91531202		Tetraselmis	suecica	140213
21_M50_Alfred Burian	9	C18:1w9c	1513.6	18.016	-39.149	E		Tetra 1.1	algae	green	M	-22.91531202		Tetraselmis	suecica	140213
21_M50_Alfred Burian	10	C18:1w7c	1532.6	6.016	-35.773	E		Tetra 1.1	algae	green	M	-22.91531202		Tetraselmis	suecica	140213
21_M50_Alfred Burian		C18:1w7c/9		24.032	-38.37	T	E	Tetra 1.1	algae	green	M	-22.91531202		Tetraselmis	suecica	140213
21_M50_Alfred Burian	11	C19:0	1631.5	10.103	-36.972	A		Tetra 1.1	algae	green	M	-22.91531202		Tetraselmis	suecica	140213
21_M50_Alfred Burian	12	C18:2w6c	1655.7	5.19	-36.221	A		Tetra 1.1	algae	green	M	-22.91531202		Tetraselmis	suecica	140213
21_M50_Alfred Burian	13	C18:3w6	1752.5	3.467	-38.352	A		Tetra 1.1	algae	green	M	-22.91531202		Tetraselmis	suecica	140213
21_M50_Alfred Burian	14	C18:3w3	1828.3	19.571	-41.176	A		Tetra 1.1	algae	green	M	-22.91531202		Tetraselmis	suecica	140213
21_M50_Alfred Burian	15	C20:1w9	1884.1	2.014	-42.912	A		Tetra 1.1	algae	green	M	-22.91531202		Tetraselmis	suecica	140213
21_M50_Alfred Burian	16	C18:4w3	1924.5	6.884	-41.98	A		Tetra 1.1	algae	green	M	-22.91531202		Tetraselmis	suecica	140213
21_M50_Alfred Burian	17	C21:0	1993.4	10.895	-33.984	A		Tetra 1.1	algae	green	M	-22.91531202		Tetraselmis	suecica	140213
21_M50_Alfred Burian		C18:5w3	2035	0.5	-49.39	C		Tetra 1.1	algae	green	M	-22.91531202		Tetraselmis	suecica	140213
21_M50_Alfred Burian		C20:4w3	2217	0.5	-46.48	C		Tetra 1.1	algae	green	M	-22.91531202		Tetraselmis	suecica	140213
21_M50_Alfred Burian	18	C20:5w3	2269.7	13.108	-37.366	C		Tetra 1.1	algae	green	M	-22.91531202		Tetraselmis	suecica	140213
5_15M_Alfred Burian	5	C16:0	1074.9	11.632	-27.777	A		Anab vir 1.1	algae	cyano	M	-14.18		Anabaena	vulgaris	140211
5_15M_Alfred Burian	6	C16:1w9/7	1163.3	7.654	-30.592	T	1	Anab vir 1.1	algae	cyano	M	-14.18		Anabaena	vulgaris	140211
5_15M_Alfred Burian	7	C17:0	1249.8	2.464	-36.462	A		Anab vir 1.1	algae	cyano	M	-14.18		Anabaena	vulgaris	140211
5_15M_Alfred Burian	8	C16:2w4	1319.6	1.181	-34.459	A		Anab vir 1.1	algae	cyano	M	-14.18		Anabaena	vulgaris	140211
5_15M_Alfred Burian		C18:0	1433	0.4	-35.1	B		Anab vir 1.1	algae	cyano	M	-14.18		Anabaena	vulgaris	140211
5_15M_Alfred Burian		C16:4w1	1460	0.3	-39.9	B		Anab vir 1.1	algae	cyano	M	-14.18		Anabaena	vulgaris	140211
5_15M_Alfred Burian	9	C18:1w9c	1511.3	1.224	-27.146	A		Anab vir 1.1	algae	cyano	M	-14.18		Anabaena	vulgaris	140211
5_15M_Alfred Burian	10	C18:1w7c	1527.6	1.377	-24.88	A		Anab vir 1.1	algae	cyano	M	-14.18		Anabaena	vulgaris	140211
5_15M_Alfred Burian	11	C19:0	1623.9	4.346	-36.361	A		Anab vir 1.1	algae	cyano	M	-14.18		Anabaena	vulgaris	140211
5_15M_Alfred Burian	12	C18:2w6c	1652.6	2.624	-29.29	A		Anab vir 1.1	algae	cyano	M	-14.18		Anabaena	vulgaris	140211
5_15M_Alfred Burian	13	C18:3w3	1825.6	14.64	-31.325	A		Anab vir 1.1	algae	cyano	M	-14.18		Anabaena	vulgaris	140211
5_15M_Alfred Burian	14	C21:0	1988.8	9.555	-32.601	A		Anab vir 1.1	algae	cyano	M	-14.18		Anabaena	vulgaris	140211
5_15M_Alfred Burian	15	C23:0	2260.5	2.075	-35.968	A		Anab vir 1.1	algae	cyano	M	-14.18		Anabaena	vulgaris	140211
4_70M_Alfred Burian	6	C16:0	1079.7	24.17	-37.403	A		D. Tert 2nd take 80 ml 1	algae	green	M	-23.82382013		Dunaliella	tertiolecta	140211	Tetraselmis	suecica
4_70M_Alfred Burian	7	C16:1w9/7	1168.7	4.86	-36.637	T	1	D. Tert 2nd take 80 ml 1	algae	green	M	-23.82382013		Dunaliella	tertiolecta	140211	Tetraselmis	suecica
4_70M_Alfred Burian	8	C17:0	1252.5	3.742	-35.864	A		D. Tert 2nd take 80 ml 1	algae	green	M	-23.82382013		Dunaliella	tertiolecta	140211	Tetraselmis	suecica
4_70M_Alfred Burian	9	C16:2w6	1278.2	0.952	-38.402	A		D. Tert 2nd take 80 ml 1	algae	green	M	-23.82382013		Dunaliella	tertiolecta	140211	Tetraselmis	suecica
4_70M_Alfred Burian	10	C16:4w3	1445.4	6.291	-37.609	B		D. Tert 2nd take 80 ml 1	algae	green	M	-23.82382013		Dunaliella	tertiolecta	140211	Tetraselmis	suecica
4_70M_Alfred Burian	11	C18:1w9c	1514.6	17.371	-41.444	E		D. Tert 2nd take 80 ml 1	algae	green	M	-23.82382013		Dunaliella	tertiolecta	140211	Tetraselmis	suecica
4_70M_Alfred Burian	12	C18:1w7c	1529.9	2.383	-31.393	E		D. Tert 2nd take 80 ml 1	algae	green	M	-23.82382013		Dunaliella	tertiolecta	140211	Tetraselmis	suecica
4_70M_Alfred Burian	12	C18:1w7c/9	1529.9	19.754	-40.25	T	E	D. Tert 2nd take 80 ml 1	algae	green	M	-23.82382013		Dunaliella	tertiolecta	140211	Tetraselmis
4_70M_Alfred Burian	13	C19:0	1634	7.748	-36.694	A		D. Tert 2nd take 80 ml 1	algae	green	M	-23.82382013		Dunaliella	tertiolecta	140211	Tetraselmis	suecica
4_70M_Alfred Burian	14	C18:2w6c	1654.4	1.635	-40.33	A		D. Tert 2nd take 80 ml 1	algae	green	M	-23.82382013		Dunaliella	tertiolecta	140211	Tetraselmis	suecica
4_70M_Alfred Burian	15	C18:3w6	1752.5	4.137	-43.502	A		D. Tert 2nd take 80 ml 1	algae	green	M	-23.82382013		Dunaliella	tertiolecta	140211	Tetraselmis	suecica
4_70M_Alfred Burian	16	C18:3w3	1837.1	72.898	-39.818	A		D. Tert 2nd take 80 ml 1	algae	green	M	-23.82382013		Dunaliella	tertiolecta	140211	Tetraselmis	suecica
4_70M_Alfred Burian	17	C18:4w3	1923.6	3.2	-45.86	A		D. Tert 2nd take 80 ml 1	algae	green	M	-23.82382013		Dunaliella	tertiolecta	140211	Tetraselmis	suecica
4_70M_Alfred Burian	18	C21:0	1988.4	6.522	-34.256	A		D. Tert 2nd take 80 ml 1	algae	green	M	-23.82382013		Dunaliella	tertiolecta	140211	Tetraselmis	suecica
4_70M_Alfred Burian	19	C23:0	2260.1	1	-37.303	A		D. Tert 2nd take 80 ml 1	algae	green	M	-23.82382013		Dunaliella	tertiolecta	140211	Tetraselmis	suecica
9_10M_Alfred Burian	6	C16:0	1083	34.405	-24.508	A		Seleneastrum old	algae	green	M	-15.55		Selenastrum		140211
9_10M_Alfred Burian	7	C16:1w13	1147.6	0.969	-25.805	A		Seleneastrum old	algae	green	M	-15.55		Selenastrum		140211
9_10M_Alfred Burian	8	C16:1w9/7	1170.6	4.935	-24.492	T	1	Seleneastrum old	algae	green	M	-15.55		Selenastrum		140211
9_10M_Alfred Burian	9	C17:0	1253.8	3.794	-34.656	A		Seleneastrum old	algae	green	M	-15.55		Selenastrum		140211
9_10M_Alfred Burian	10	C18:0	1445.9	3.12	-24.476	B		Seleneastrum old	algae	green	M	-15.55		Selenastrum		140211
9_10M_Alfred Burian	11	C18:1w9c	1515.9	30.7	-15.228	E		Seleneastrum old	algae	green	M	-15.55		Selenastrum		140211
9_10M_Alfred Burian	13	C18:1w7c	1532.8	1.919	-25.495	E		Seleneastrum old	algae	green	M	-15.55		Selenastrum		140211
9_10M_Alfred Burian		C18:1w7c/9		32.619	-24.09	T	E	Seleneastrum old	algae	green	M	-15.55		Selenastrum		140211
9_10M_Alfred Burian	14	C19:0	1632.5	8.473	-35.964	A		Seleneastrum old	algae	green	M	-15.55		Selenastrum		140211
9_10M_Alfred Burian	15	C18:2w6c	1660.5	13.962	-23.244	A		Seleneastrum old	algae	green	M	-15.55		Selenastrum		140211
9_10M_Alfred Burian	16	C18:3w3	1833.1	32.525	-24.504	A		Seleneastrum old	algae	green	M	-15.55		Selenastrum		140211
9_10M_Alfred Burian	17	C18:4w3	1926.6	7.454	-27.879	A		Seleneastrum old	algae	green	M	-15.55		Selenastrum		140211
9_10M_Alfred Burian	18	C21:0	1990.7	7.851	-34.042	A		Seleneastrum old	algae	green	M	-15.55		Selenastrum		140211
9_10M_Alfred Burian	19	C23:0	2269.5	13.374	-35.088	A		Seleneastrum old	algae	green	M	-15.55		Selenastrum		140211
24_M41_Alfred Burian	5	C16:0	1078.9	19.06	-25.1	A		Haem 1.1	algae	green	M	-14.44385996		Haematococcus	pluvialis	140213
24_M41_Alfred Burian	6	C16:1w9/7	1162.9	2.897	-23.632	T	1	Haem 1.1	algae	green	M	-14.44385996		Haematococcus	pluvialis	140213
24_M41_Alfred Burian	7	C17:0	1252.5	2.555	-35.657	A		Haem 1.1	algae	green	M	-14.44385996		Haematococcus	pluvialis	140213
24_M41_Alfred Burian		C16:2w6	1278	0.5	-24.7	C		Haem 1.1	algae	green	M	-14.44385996		Haematococcus	pluvialis	140213
24_M41_Alfred Burian		C16:3w4	1342	0.35	-27.8	C		Haem 1.1	algae	green	M	-14.44385996		Haematococcus	pluvialis	140213
24_M41_Alfred Burian	8	C18:0	1437.1	1.003	-27.29	E		Haem 1.1	algae	green	M	-14.44385996		Haematococcus	pluvialis	140213
24_M41_Alfred Burian	9	C16:4w3	1444.4	2.596	-24.61	E		Haem 1.1	algae	green	M	-14.44385996		Haematococcus	pluvialis	140213
24_M41_Alfred Burian		C16:4w3/C18:0		3.599	-26.5	T	E	Haem 1.1	algae	green	M	-14.44385996		Haematococcus	pluvialis	140213
24_M41_Alfred Burian	10	C18:1w9c	1513.2	9.845	-26.759	E		Haem 1.1	algae	green	M	-14.44385996		Haematococcus	pluvialis	140213
24_M41_Alfred Burian	11	C18:1w7c	1529.9	1.711	-21.041	E		Haem 1.1	algae	green	M	-14.44385996		Haematococcus	pluvialis	140213
24_M41_Alfred Burian		C18:1w7c/9		11.556	-25.8	T	E	Haem 1.1	algae	green	M	-14.44385996		Haematococcus	pluvialis	140213
24_M41_Alfred Burian	12	C19:0	1628.7	5.838	-37.495	A		Haem 1.1	algae	green	M	-14.44385996		Haematococcus	pluvialis	140213
24_M41_Alfred Burian	13	C18:2w6c	1656.3	8.067	-26.489	A		Haem 1.1	algae	green	M	-14.44385996		Haematococcus	pluvialis	140213
24_M41_Alfred Burian	14	C18:3w6	1751.8	2.087	-32.407	A		Haem 1.1	algae	green	M	-14.44385996		Haematococcus	pluvialis	140213
24_M41_Alfred Burian	15	C18:3w3	1829	22.776	-26.789	A		Haem 1.1	algae	green	M	-14.44385996		Haematococcus	pluvialis	140213
24_M41_Alfred Burian	16	C18:4w3	1923.2	3.284	-32.599	A		Haem 1.1	algae	green	M	-14.44385996		Haematococcus	pluvialis	140213
24_M41_Alfred Burian	17	C21:0	1989.7	6.619	-34.827	A		Haem 1.1	algae	green	M	-14.44385996		Haematococcus	pluvialis	140213
24_M41_Alfred Burian		C20:3w3+C20:4w6+C22:0	2142	0.8	-32.08	A		Haem 1.1	algae	green	M	-14.44385996		Haematococcus	pluvialis	140213
24_M41_Alfred Burian	19	C20:5w3	2266.8	0.951	-26.287	A		Haem 1.1	algae	green	M	-14.44385996		Haematococcus	pluvialis	140213
18_M61_Alfred Burian	5	C14:0	751.6	6.289	-24.97	A		Chaet 1.1	algae	diatom	M	-14.38		Chaetocerus	old	140213	Ana Kiel 1.1 B+A	algae	cyano	M
18_M61_Alfred Burian	6	C14:1	827	3.324	-22.453	A		Chaet 1.1	algae	diatom	M	-14.38		Chaetocerus	old	140213	Ana Kiel 1.1 B+A	algae	cyano	M
18_M61_Alfred Burian	7	C16:0	1073.4	3.824	-25.154	A		Chaet 1.1	algae	diatom	M	-14.38		Chaetocerus	old	140213	Ana Kiel 1.1 B+A	algae	cyano	M
18_M61_Alfred Burian	8	C16:1w9/7	1162.2	3.507	-25.323	T	1	Chaet 1.1	algae	diatom	M	-14.38		Chaetocerus	old	140213	Ana Kiel 1.1 B+A	algae	cyano	M
18_M61_Alfred Burian	9	C17:0	1254	6.507	-36.7	A		Chaet 1.1	algae	diatom	M	-14.38		Chaetocerus	old	140213	Ana Kiel 1.1 B+A	algae	cyano	M
18_M61_Alfred Burian		C16:2w4	1320	0.6	-28.9	A		Chaet 1.1	algae	diatom	M	-14.38		Chaetocerus	old	140213	Ana Kiel 1.1 B+A	algae	cyano	M
18_M61_Alfred Burian	10	C18:0	1435.8	0.974	-31.3	A		Chaet 1.1	algae	diatom	M	-14.38		Chaetocerus	old	140213	Ana Kiel 1.1 B+A	algae	cyano	M
18_M61_Alfred Burian		C18:1w9c	1512	0.4	-39.5	F		Chaet 1.1	algae	diatom	M	-14.38		Chaetocerus	old	140213	Ana Kiel 1.1 B+A	algae	cyano	M
18_M61_Alfred Burian	11	C18:1w7c	1531.1	4.808	-23.971	A		Chaet 1.1	algae	diatom	M	-14.38		Chaetocerus	old	140213	Ana Kiel 1.1 B+A	algae	cyano	M
18_M61_Alfred Burian	12	C18:1w5	1569.4	0.961	-32.407	A		Chaet 1.1	algae	diatom	M	-14.38		Chaetocerus	old	140213	Ana Kiel 1.1 B+A	algae	cyano	M
18_M61_Alfred Burian	13	C19:0	1631.7	16.876	-36.185	A		Chaet 1.1	algae	diatom	M	-14.38		Chaetocerus	old	140213	Ana Kiel 1.1 B+A	algae	cyano	M
18_M61_Alfred Burian	14	C21:0	1993.9	14.274	-33.985	A		Chaet 1.1	algae	diatom	M	-14.38		Chaetocerus	old	140213	Ana Kiel 1.1 B+A	algae	cyano	M
18_M61_Alfred Burian	16	C23:0	2267	1.146	-11.753	F		Chaet 1.1	algae	diatom	M	-14.38		Chaetocerus	old	140213	Ana Kiel 1.1 B+A	algae	cyano	M
22_M23_Alfred Burian	5	C14:0	750.5	1.587	-37.241	A		Phaeod 1.1	algae	diatom	M	-26.33934676		Phaeodactylum	tricornutum	140213
22_M23_Alfred Burian	6	C16:0	1074.3	5.657	-34.855	A		Phaeod 1.1	algae	diatom	M	-26.33934676		Phaeodactylum	tricornutum	140213
22_M23_Alfred Burian	7	C16:1w9/7	1163.1	5.378	-37.902	T	1	Phaeod 1.1	algae	diatom	M	-26.33934676		Phaeodactylum	tricornutum	140213
22_M23_Alfred Burian	8	C17:0	1252.5	3.719	-37.1	B		Phaeod 1.1	algae	diatom	M	-26.33934676		Phaeodactylum	tricornutum	140213
22_M23_Alfred Burian	9	C16:2w4	1320.5	1.071	-39.457	A		Phaeod 1.1	algae	diatom	M	-26.33934676		Phaeodactylum	tricornutum	140213
22_M23_Alfred Burian	10	C16:3w3	1424.3	3.765	-40.42	E		Phaeod 1.1	algae	diatom	M	-26.33934676		Phaeodactylum	tricornutum	140213
22_M23_Alfred Burian	11	C18:0	1435	1.258	-32.444	E		Phaeod 1.1	algae	diatom	M	-26.33934676		Phaeodactylum	tricornutum	140213
22_M23_Alfred Burian	12	C18:1w9c	1512.5	1.199	-34.044	A		Phaeod 1.1	algae	diatom	M	-26.33934676		Phaeodactylum	tricornutum	140213
22_M23_Alfred Burian	13	C19:0	1628.3	10.356	-35.613	A		Phaeod 1.1	algae	diatom	M	-26.33934676		Phaeodactylum	tricornutum	140213
22_M23_Alfred Burian	14	C18:2w6c	1653	1.077	-38.1	B		Phaeod 1.1	algae	diatom	M	-26.33934676		Phaeodactylum	tricornutum	140213
22_M23_Alfred Burian		C18:3w6	1750	0.55	-47.2	C		Phaeod 1.1	algae	diatom	M	-26.33934676		Phaeodactylum	tricornutum	140213
22_M23_Alfred Burian	15	C21:0	1991.8	9.802	-32.707	A		Phaeod 1.1	algae	diatom	M	-26.33934676		Phaeodactylum	tricornutum	140213
22_M23_Alfred Burian	16	C20:3w3+C20:4w6+C22:0	2142	0.794	-47.625	A		Phaeod 1.1	algae	diatom	M	-26.33934676		Phaeodactylum	tricornutum	140213
22_M23_Alfred Burian	17	C23:0	2268.1	5.793	-38.607	A		Phaeod 1.1	algae	diatom	M	-26.33934676		Phaeodactylum	tricornutum	140213
22_M23_Alfred Burian		C22:5w3	2503	0.55	-45.3	A		Phaeod 1.1	algae	diatom	M	-26.33934676		Phaeodactylum	tricornutum	140213
32_M53_Alfred Burian	5	C14:0	750.7	1.988	-24.132	A		Navi 2.1	algae	diatom	M	-14.62348355		Navicula	pelliculosa	140213
32_M53_Alfred Burian	6	C16:0	1078.4	12.695	-24.5	B		Navi 2.1	algae	diatom	M	-14.62348355		Navicula	pelliculosa	140213
32_M53_Alfred Burian	7	C16:1w9/7	1171	34.614	-23.777	T	1	Navi 2.1	algae	diatom	M	-14.62348355		Navicula	pelliculosa	140213
32_M53_Alfred Burian	8	C17:0	1268	2.457	-27.758	A		Navi 2.1	algae	diatom	M	-14.62348355		Navicula	pelliculosa	140213
32_M53_Alfred Burian	9	C16:2w4	1321.5	2.256	-28.206	A		Navi 2.1	algae	diatom	M	-14.62348355		Navicula	pelliculosa	140213
32_M53_Alfred Burian	10	C16:3w3	1425	4.82	-29.501	E		Navi 2.1	algae	diatom	M	-14.62348355		Navicula	pelliculosa	140213
32_M53_Alfred Burian	11	C18:0	1436	1.416	-26.582	E		Navi 2.1	algae	diatom	M	-14.62348355		Navicula	pelliculosa	140213
32_M53_Alfred Burian		C18:1w7c/9		6.236	-28.977	T	E	Navi 2.1	algae	diatom	M	-14.62348355		Navicula	pelliculosa	140213
32_M53_Alfred Burian	12	C18:1w9c	1513.4	1.564	-31.407	A		Navi 2.1	algae	diatom	M	-14.62348355		Navicula	pelliculosa	140213
32_M53_Alfred Burian	13	C18:1w5	1569.4	1.314	-36.225	A		Navi 2.1	algae	diatom	M	-14.62348355		Navicula	pelliculosa	140213
32_M53_Alfred Burian	14	C19:0	1628.9	9.765	-36.419	A		Navi 2.1	algae	diatom	M	-14.62348355		Navicula	pelliculosa	140213
32_M53_Alfred Burian	15	C21:0	1993.2	9.281	-33.776	A		Navi 2.1	algae	diatom	M	-14.62348355		Navicula	pelliculosa	140213
32_M53_Alfred Burian	16	C20:3w6	2078.5	1.083	-37.827	A		Navi 2.1	algae	diatom	M	-14.62348355		Navicula	pelliculosa	140213
32_M53_Alfred Burian		C20:3w3+C20:4w6+C22:0	2142	0.433	-48.99	B		Navi 2.1	algae	diatom	M	-14.62348355		Navicula	pelliculosa	140213
32_M53_Alfred Burian	17	C20:5w3	2270.4	14.276	-27.377	A		Navi 2.1	algae	diatom	M	-14.62348355		Navicula	pelliculosa	140214
40_M52_Alfred Burian	5	C14:0	751.8	5.312	-23.721	A		Navi 1.1	algae	diatom	M	-14.62348355		Navicula	pelliculosa	140214
40_M52_Alfred Burian	6	C16:0	1083	25.718	-24.083	A		Navi 1.1	algae	diatom	M	-14.62348355		Navicula	pelliculosa	140214
40_M52_Alfred Burian	7	C16:1w9/7	1175.4	56.063	-23.817	T	1	Navi 1.1	algae	diatom	M	-14.62348355		Navicula	pelliculosa	140214
40_M52_Alfred Burian	8	C16:2w7	1253.4	1.918	-41.249	A		Navi 1.1	algae	diatom	M	-14.62348355		Navicula	pelliculosa	140214
40_M52_Alfred Burian	9	C17:0	1269.7	3.766	-28.325	A		Navi 1.1	algae	diatom	M	-14.62348355		Navicula	pelliculosa	140214
40_M52_Alfred Burian	10	C16:2w4	1323	3.58	-30.358	A		Navi 1.1	algae	diatom	M	-14.62348355		Navicula	pelliculosa	140214
40_M52_Alfred Burian	11	C16:3w3	1425.4	3.751	-32.263	A		Navi 1.1	algae	diatom	M	-14.62348355		Navicula	pelliculosa	140214
40_M52_Alfred Burian	12	C18:1w9c	1513.8	1.507	-23.958	A		Navi 1.1	algae	diatom	M	-14.62348355		Navicula	pelliculosa	140214
40_M52_Alfred Burian	13	C18:1w7c	1530.1	1.517	-30	D		Navi 1.1	algae	diatom	M	-14.62348355		Navicula	pelliculosa	140214
40_M52_Alfred Burian	14	C18:1w5	1569.8	1.073	-24.432	A		Navi 1.1	algae	diatom	M	-14.62348355		Navicula	pelliculosa	140214
40_M52_Alfred Burian	15	C19:0	1630	13.846	-35.727	D		Navi 1.1	algae	diatom	M	-14.62348355		Navicula	pelliculosa	140214
40_M52_Alfred Burian	16	C18:2w6c	1653.4	7.211	-41.282	D		Navi 1.1	algae	diatom	M	-14.62348355		Navicula	pelliculosa	140214
40_M52_Alfred Burian		C20:3w6	2089	0.7	-44.9	B		Navi 1.1	algae	diatom	M	-14.62348355		Navicula	pelliculosa	140214
40_M52_Alfred Burian	19	C20:3w3+C20:4w6+C22:0	2143.5	3.666	-30.788	A		Navi 1.1	algae	diatom	M	-14.62348355		Navicula	pelliculosa	140214
40_M52_Alfred Burian	20	C22:1w9	2189.7	1.017	-30.348	A		Navi 1.1	algae	diatom	M	-14.62348355		Navicula	pelliculosa	140214
40_M52_Alfred Burian	21	C20:5w3	2274.5	44.642	-25.401	B		Navi 1.1	algae	diatom	M	-14.62348355		Navicula	pelliculosa	140214
40_M52_Alfred Burian	22	C22:5w3	2504.2	1.497	-24.998	A		Navi 1.1	algae	diatom	M	-14.62348355		Navicula	pelliculosa	140214
30_M20_Alfred Burian	5	C16:0	1075.1	8.015	-32.947	F								Not_iden_rmv	Not_iden_rmv	140214	Synechocystis
30_M20_Alfred Burian	6	C17:0	1250.4	1.097	-33.985	F								Not_iden_rmv	Not_iden_rmv	140214	Synechocystis
30_M20_Alfred Burian	7	C18:0	1434.8	0.985	-30.632	F								Not_iden_rmv	Not_iden_rmv	140214	Synechocystis
30_M20_Alfred Burian	8	C19:0	1623.9	3.525	-34.558	F								Not_iden_rmv	Not_iden_rmv	140214	Synechocystis
30_M20_Alfred Burian	9	C21:0	1987.4	3.683	-31.621	F								Not_iden_rmv	Not_iden_rmv	140214	Synechocystis
30_M20_Alfred Burian	10	C24:1w9	2429	0.831	-32.613	F								Not_iden_rmv	Not_iden_rmv	140214	Synechocystis
30_M20_Alfred Burian		C22:6w3	2543	0.37	-30.2	F								Not_iden_rmv	Not_iden_rmv	140214	Synechocystis
33_M48_Alfred Burian	6	C16:0	1075.1	7.778	-29.709	B		Scen 1.1	algae	green	M	-20.1967998		Scenedesmus		140214
33_M48_Alfred Burian		C16:1w13	1145	0.4	-30.03	A		Scen 1.1	algae	green	M	-20.1967998		Scenedesmus		140214
33_M48_Alfred Burian	7	C16:1w9/7	1167.3	1.193	-30.271	T	1	Scen 1.1	algae	green	M	-20.1967998		Scenedesmus		140214
33_M48_Alfred Burian	8	C17:0	1253.8	6.064	-35.274	A		Scen 1.1	algae	green	M	-20.1967998		Scenedesmus		140214
33_M48_Alfred Burian	9	C18:0	1436.2	0.93	-26.972	B		Scen 1.1	algae	green	M	-20.1967998		Scenedesmus		140214
33_M48_Alfred Burian	10	C18:1w9c	1514	5.03	-27.977	E		Scen 1.1	algae	green	M	-20.1967998		Scenedesmus		140214
33_M48_Alfred Burian	11	C18:1w7c	1529.5	1.146	-16.15	E		Scen 1.1	algae	green	M	-20.1967998		Scenedesmus		140214
33_M48_Alfred Burian		C18:1w7c/9		6.176	-25.788	T	E	Scen 1.1	algae	green	M	-20.1967998		Scenedesmus		140214
33_M48_Alfred Burian	12	C19:0	1631.7	15.445	-34.455	A		Scen 1.1	algae	green	M	-20.1967998		Scenedesmus		140214
33_M48_Alfred Burian	13	C18:2w6c	1653.6	0.925	-14.475	B		Scen 1.1	algae	green	M	-20.1967998		Scenedesmus		140214
33_M48_Alfred Burian	14	C18:3w3	1822.7	3.078	-31.808	A		Scen 1.1	algae	green	M	-20.1967998		Scenedesmus		140214
33_M48_Alfred Burian	15	C21:0	1995.1	16.34	-31.911	A		Scen 1.1	algae	green	M	-20.1967998		Scenedesmus		140214
33_M48_Alfred Burian	16	C23:0	2264.3	3.084	-34.581	A		Scen 1.1	algae	green	M	-20.1967998		Scenedesmus		140214
36_M28_Alfred Burian	5	C16:0	1074.7	6.545	-35.98	A		Nodularia 2.1.2	algae	cyano	M	-26.20996838		Nodularia	spumigena	140214
36_M28_Alfred Burian	6	C16:1w9/7	1162	1.454	-35.426	T	1	Nodularia 2.1.2	algae	cyano	M	-26.20996838		Nodularia	spumigena	140214
36_M28_Alfred Burian	7	C17:0	1251.9	2.921	-34.85	A		Nodularia 2.1.2	algae	cyano	M	-26.20996838		Nodularia	spumigena	140214
36_M28_Alfred Burian	8	C18:0	1436	1.287	-31.281	A		Nodularia 2.1.2	algae	cyano	M	-26.20996838		Nodularia	spumigena	140214
36_M28_Alfred Burian	9	C18:1w9c	1513	1.384	-25.159	A		Nodularia 2.1.2	algae	cyano	M	-26.20996838		Nodularia	spumigena	140214
36_M28_Alfred Burian	10	C18:1w7c	1529	0.933	-16.7	D		Nodularia 2.1.2	algae	cyano	M	-26.20996838		Nodularia	spumigena	140214
36_M28_Alfred Burian	11	C19:0	1631.5	16.711	-33.949	D		Nodularia 2.1.2	algae	cyano	M	-26.20996838		Nodularia	spumigena	140214
36_M28_Alfred Burian	12	C18:2w6c	1653.2	7.568	-24.177	D		Nodularia 2.1.2	algae	cyano	M	-26.20996838		Nodularia	spumigena	140214
36_M28_Alfred Burian	13	C18:3w6	1762.3	58.915	-54.681	D		Nodularia 2.1.2	algae	cyano	M	-26.20996838		Nodularia	spumigena	140214
36_M28_Alfred Burian	14	C20:3w3+C20:4w6+C22:0	1822.9	3.145	-40.585	F		Nodularia 2.1.2	algae	cyano	M	-26.20996838		Nodularia	spumigena	140214
36_M28_Alfred Burian	15	C18:4w3	1923	4.986	-40.114	A		Nodularia 2.1.2	algae	cyano	M	-26.20996838		Nodularia	spumigena	140214
36_M28_Alfred Burian	16	C21:0	1994.3	13.771	-33.325	A		Nodularia 2.1.2	algae	cyano	M	-26.20996838		Nodularia	spumigena	140214
36_M28_Alfred Burian	17	C23:0	2263.1	1.263	-36.336	A		Nodularia 2.1.2	algae	cyano	M	-26.20996838		Nodularia	spumigena	140214
45_M18_Alfred Burian	5	C14:0	750.5	1.128	-38.015	A		Synechococc 2.1	algae	cyano	M	-29.42027135		Synechococcus		140217
45_M18_Alfred Burian	6	C14:1	847.1	1.765	-38.49	A		Synechococc 2.1	algae	cyano	M	-29.42027135		Synechococcus		140217
45_M18_Alfred Burian	7	C16:0	1077.8	13.614	-40.526	A		Synechococc 2.1	algae	cyano	M	-29.42027135		Synechococcus		140217
45_M18_Alfred Burian	8	C16:1w9/7	1165.2	8.982	-42.302	T	1	Synechococc 2.1	algae	cyano	M	-29.42027135		Synechococcus		140217
45_M18_Alfred Burian	9	C17:0	1252.1	2.264	-40.431	A		Synechococc 2.1	algae	cyano	M	-29.42027135		Synechococcus		140217
45_M18_Alfred Burian		C18:1w9c	1512	0.39	-29.989	C		Synechococc 2.1	algae	cyano	M	-29.42027135		Synechococcus		140217
45_M18_Alfred Burian	10	C18:1w7c	1530.7	3.225	-39.097	A		Synechococc 2.1	algae	cyano	M	-29.42027135		Synechococcus		140217
45_M18_Alfred Burian	11	C19:0	1628.7	9.134	-36.61	A		Synechococc 2.1	algae	cyano	M	-29.42027135		Synechococcus		140217
45_M18_Alfred Burian	12	C21:0	1992.4	9.147	-33.487	A		Synechococc 2.1	algae	cyano	M	-29.42027135		Synechococcus		140217
45_M18_Alfred Burian	13	C23:0	2263.9	1.807	-35.781	A		Synechococc 2.1	algae	cyano	M	-29.42027135		Synechococcus		140217
25_M67_Alfred Burian	5	C16:0	1087.8	53.886	-44.453	B		D. Sal 1.1	algae	green	M	-32.28708064		Dunaliella	salina	140214
25_M67_Alfred Burian	6	C16:1w9/7	1174.8	9.794	-45.494	T	1	D. Sal 1.1	algae	green	M	-32.28708064		Dunaliella	salina	140214
25_M67_Alfred Burian	7	C17:0	1258	4.418	-39.049	A		D. Sal 1.1	algae	green	M	-32.28708064		Dunaliella	salina	140214
25_M67_Alfred Burian	8	C16:2w6	1285.3	14.106	-39.831	A		D. Sal 1.1	algae	green	M	-32.28708064		Dunaliella	salina	140214
25_M67_Alfred Burian	9	C16:3w4	1345.8	3.804	-52.669	B		D. Sal 1.1	algae	green	M	-32.28708064		Dunaliella	salina	140214
25_M67_Alfred Burian	10	C16:4w3	1449.8	13.125	-44.653	A		D. Sal 1.1	algae	green	M	-32.28708064		Dunaliella	salina	140214
25_M67_Alfred Burian	11	C18:1w9c	1516.9	21.193	-44.555	E		D. Sal 1.1	algae	green	M	-32.28708064		Dunaliella	salina	140214
25_M67_Alfred Burian	12	C18:1w7c	1539.5	6.525	-42.074	E		D. Sal 1.1	algae	green	M	-32.28708064		Dunaliella	salina	140214
25_M67_Alfred Burian	16	C18:1w7c/9		27.718	-44.09	T	E	D. Sal 1.1	algae	green	M	-32.28708064		Dunaliella	salina	140214
25_M67_Alfred Burian	13	C18:2w6t	1624.8	2.121	-51.583	D		D. Sal 1.1	algae	green	M	-32.28708064		Dunaliella	salina	140214
25_M67_Alfred Burian	14	C19:0	1642.9	10.466	-37.097	D		D. Sal 1.1	algae	green	M	-32.28708064		Dunaliella	salina	140214
25_M67_Alfred Burian	15	C18:2w6c	1669.1	43.989	-40.1	B		D. Sal 1.1	algae	green	M	-32.28708064		Dunaliella	salina	140214
25_M67_Alfred Burian	16	C18:3w6	1762.7	24.492	-56.294	B		D. Sal 1.1	algae	green	M	-32.28708064		Dunaliella	salina	140214
25_M67_Alfred Burian	17	C18:3w3	1843	83.894	-49.325	A		D. Sal 1.1	algae	green	M	-32.28708064		Dunaliella	salina	140214
25_M67_Alfred Burian	18	C18:4w3	1927.4	1.642	-63.847	B		D. Sal 1.1	algae	green	M	-32.28708064		Dunaliella	salina	140214
25_M67_Alfred Burian	19	C21:0	2000.3	19.189	-34.485	A		D. Sal 1.1	algae	green	M	-32.28708064		Dunaliella	salina	140214
25_M67_Alfred Burian	20	C23:0	2266.8	2.831	-37.403	A		D. Sal 1.1	algae	green	M	-32.28708064		Dunaliella	salina	140214
26_M55_Alfred Burian	10	C16:0	1085.8	52.875	-26.629	A		Anabaenopsis 2.1	algae	cyano	M	-14.74153671		Anabaenopsis	elenkinii	140214
26_M55_Alfred Burian	11	C16:1w9/7	1164.5	2.763	-29.125	T	1	Anabaenopsis 2.1	algae	cyano	M	-14.74153671		Anabaenopsis	elenkinii	140214
26_M55_Alfred Burian	12	C16:1w5	1190	7.186	-30.098	A		Anabaenopsis 2.1	algae	cyano	M	-14.74153671		Anabaenopsis	elenkinii	140214
26_M55_Alfred Burian	13	C18:0	1443.6	12.479	-24.141	A		Anabaenopsis 2.1	algae	cyano	M	-14.74153671		Anabaenopsis	elenkinii	140214
26_M55_Alfred Burian		C18:1w9c	1514	1.1	-30.07	A		Anabaenopsis 2.1	algae	cyano	M	-14.74153671		Anabaenopsis	elenkinii	140214
26_M55_Alfred Burian	14	C18:1w7c	1531.3	1.437	-26.5	A		Anabaenopsis 2.1	algae	cyano	M	-14.74153671		Anabaenopsis	elenkinii	140214
26_M55_Alfred Burian	15	C19:0	1628.3	3.479	-38.288	A		Anabaenopsis 2.1	algae	cyano	M	-14.74153671		Anabaenopsis	elenkinii	140214
26_M55_Alfred Burian	16	C18:2w6c	1655.7	5.197	-25.984	A		Anabaenopsis 2.1	algae	cyano	M	-14.74153671		Anabaenopsis	elenkinii	140214
26_M55_Alfred Burian	17	C18:3w6	1752.5	4.342	-30.886	A		Anabaenopsis 2.1	algae	cyano	M	-14.74153671		Anabaenopsis	elenkinii	140214
26_M55_Alfred Burian	18	C18:3w3	1828.8	22.664	-29.121	A		Anabaenopsis 2.1	algae	cyano	M	-14.74153671		Anabaenopsis	elenkinii	140214
26_M55_Alfred Burian	19	C18:4w3	1927.8	23.526	-33.101	A		Anabaenopsis 2.1	algae	cyano	M	-14.74153671		Anabaenopsis	elenkinii	140214
26_M55_Alfred Burian	20	C21:0	1989.1	5.291	-37.002	A		Anabaenopsis 2.1	algae	cyano	M	-14.74153671		Anabaenopsis	elenkinii	140214
27_M62_Alfred Burian	5	C16:0	1078.2	16.655	-26.9	B		Mono 1.1	algae	green	M	-16.15226246		Monoraphidium		140214
27_M62_Alfred Burian		C16:1w13	1145	0.8	-27.8	B		Mono 1.1	algae	green	M	-16.15226246		Monoraphidium		140214
27_M62_Alfred Burian	6	C16:1w9/7	1169.8	6.63	-26.845	T	1	Mono 1.1	algae	green	M	-16.15226246		Monoraphidium		140214
27_M62_Alfred Burian	7	C17:0	1253	3.244	-35.548	A		Mono 1.1	algae	green	M	-16.15226246		Monoraphidium		140214
27_M62_Alfred Burian	8	C16:2w6	1278.2	1.022	-27.632	A		Mono 1.1	algae	green	M	-16.15226246		Monoraphidium		140214
27_M62_Alfred Burian	9	C16:4w3	1443.8	2.565	-28.327	B		Mono 1.1	algae	green	M	-16.15226246		Monoraphidium		140214
27_M62_Alfred Burian	10	C18:1w9c	1514.2	26.178	-26.994	E		Mono 1.1	algae	green	M	-16.15226246		Monoraphidium		140214
27_M62_Alfred Burian	11	C18:1w7c	1531.1	2.354	-24.651	E		Mono 1.1	algae	green	M	-16.15226246		Monoraphidium		140214
27_M62_Alfred Burian		C18:1w7c/9		28.532	-26.8	T	E	Mono 1.1	algae	green	M	-16.15226246		Monoraphidium		140214
27_M62_Alfred Burian	12	C19:0	1632.5	10.048	-37.156	A		Mono 1.1	algae	green	M	-16.15226246		Monoraphidium		140214
27_M62_Alfred Burian	13	C18:2w6c	1656.5	8.461	-26.195	B		Mono 1.1	algae	green	M	-16.15226246		Monoraphidium		140214
27_M62_Alfred Burian	14	C18:3w3	1831	35.102	-28.199	A		Mono 1.1	algae	green	M	-16.15226246		Monoraphidium		140214
27_M62_Alfred Burian	15	C18:4w3	1923.8	5.287	-31.925	A		Mono 1.1	algae	green	M	-16.15226246		Monoraphidium		140214
27_M62_Alfred Burian	16	C21:0	1992.4	10.488	-35.256	A		Mono 1.1	algae	green	M	-16.15226246		Monoraphidium		140214
27_M62_Alfred Burian	17	C24:0	2379.9	3.974	-27.153	A		Mono 1.1	algae	green	M	-16.15226246		Monoraphidium		140214
28_M47_Alfred Burian	5	C14:0	754.3	19.281	-28.573	A		E. Hux naked 2.1	algae	hapto	M	-18.06304312		Emiliana	huxleyi naked	140214
28_M47_Alfred Burian	6	C14:1	827.4	3.169	-26.385	A		E. Hux naked 2.1	algae	hapto	M	-18.06304312		Emiliana	huxleyi naked	140214
28_M47_Alfred Burian	8	C16:0	1074.7	6.55	-30.225	A		E. Hux naked 2.1	algae	hapto	M	-18.06304312		Emiliana	huxleyi naked	140214
28_M47_Alfred Burian	9	C17:0	1253	5.4	-34.848	A		E. Hux naked 2.1	algae	hapto	M	-18.06304312		Emiliana	huxleyi naked	140214
28_M47_Alfred Burian		C18:0	1438	0.98	-32.2	B		E. Hux naked 2.1	algae	hapto	M	-18.06304312		Emiliana	huxleyi naked	140214
28_M47_Alfred Burian		C16:4w1	1464	0.6	-35.1	B		E. Hux naked 2.1	algae	hapto	M	-18.06304312		Emiliana	huxleyi naked	140214
28_M47_Alfred Burian	10	C18:1w9c	1517.1	9.534	-29.175	E		E. Hux naked 2.1	algae	hapto	M	-18.06304312		Emiliana	huxleyi naked	140214
28_M47_Alfred Burian	11	C18:1w7c	1532.4	5.564	-28.017	E		E. Hux naked 2.1	algae	hapto	M	-18.06304312		Emiliana	huxleyi naked	140214
28_M47_Alfred Burian		C18:1w7c/9		15.098	-28.66	T	E	E. Hux naked 2.1	algae	hapto	M	-18.06304312		Emiliana	huxleyi naked	140214
28_M47_Alfred Burian	12	C19:0	1630.6	10.46	-36.561	A		E. Hux naked 2.1	algae	hapto	M	-18.06304312		Emiliana	huxleyi naked	140214
28_M47_Alfred Burian	13	C18:2w6c	1654	2.253	-30.887	A		E. Hux naked 2.1	algae	hapto	M	-18.06304312		Emiliana	huxleyi naked	140214
28_M47_Alfred Burian		C18:3w6	1751	0.4	-38.72	B		E. Hux naked 2.1	algae	hapto	M	-18.06304312		Emiliana	huxleyi naked	140214
28_M47_Alfred Burian	14	C18:3w3	1823.3	4.565	-32.002	A		E. Hux naked 2.1	algae	hapto	M	-18.06304312		Emiliana	huxleyi naked	140214
28_M47_Alfred Burian	15	C18:4w3	1924.9	12.125	-32.268	A		E. Hux naked 2.1	algae	hapto	M	-18.06304312		Emiliana	huxleyi naked	140214
28_M47_Alfred Burian	16	C21:0	1992.8	10.145	-34.737	A		E. Hux naked 2.1	algae	hapto	M	-18.06304312		Emiliana	huxleyi naked	140214
28_M47_Alfred Burian	17	C18:5w3	2038.4	12.908	-33.337	A		E. Hux naked 2.1	algae	hapto	M	-18.06304312		Emiliana	huxleyi naked	140214
28_M47_Alfred Burian	18	C22:0	2150.6	2.641	-36.506	A		E. Hux naked 2.1	algae	hapto	M	-18.06304312		Emiliana	huxleyi naked	140214
28_M47_Alfred Burian	19	C20:5w3	2266.8	4.759	-36.03	A		E. Hux naked 2.1	algae	hapto	M	-18.06304312		Emiliana	huxleyi naked	140214
28_M47_Alfred Burian	20	C22:6w3	2550.2	28.884	-28.609	A		E. Hux naked 2.1	algae	hapto	M	-18.06304312		Emiliana	huxleyi naked	140214
37_M68_Alfred Burian	5	C14:0	751.8	5.139	-28.046	A		T. Weis 2.1	algae	diatom	M	-18.36094371		Thalassiosira	weissflogii	140214
37_M68_Alfred Burian	8	C16:0	1078.6	16.443	-27.567	B		T. Weis 2.1	algae	diatom	M	-18.36094371		Thalassiosira	weissflogii	140214
37_M68_Alfred Burian	9	C16:1w9/7	1166.8	14.069	-27.672	T	1	T. Weis 2.1	algae	diatom	M	-18.36094371		Thalassiosira	weissflogii	140214
37_M68_Alfred Burian	10	C16:1w5	1187.7	1.654	-25.855	B		T. Weis 2.1	algae	diatom	M	-18.36094371		Thalassiosira	weissflogii	140214
37_M68_Alfred Burian	11	C17:0	1253.2	2.336	-39.416	A		T. Weis 2.1	algae	diatom	M	-18.36094371		Thalassiosira	weissflogii	140214
37_M68_Alfred Burian	12	C16:2w4	1323.2	8.618	-29.441	B		T. Weis 2.1	algae	diatom	M	-18.36094371		Thalassiosira	weissflogii	140214
37_M68_Alfred Burian	13	C16:3w3	1425.2	4.859	-33.161	A		T. Weis 2.1	algae	diatom	M	-18.36094371		Thalassiosira	weissflogii	140214
37_M68_Alfred Burian	14	C16:4w1	1464.5	1.381	-29.471	A		T. Weis 2.1	algae	diatom	M	-18.36094371		Thalassiosira	weissflogii	140214
37_M68_Alfred Burian	15	C18:1w7c	1534.7	10.65	-26.685	A		T. Weis 2.1	algae	diatom	M	-18.36094371		Thalassiosira	weissflogii	140214
37_M68_Alfred Burian	16	C19:0	1629.2	8.351	-36.94	A		T. Weis 2.1	algae	diatom	M	-18.36094371		Thalassiosira	weissflogii	140214
37_M68_Alfred Burian	17	C18:2w6c	1654.4	1.523	-36.027	A		T. Weis 2.1	algae	diatom	M	-18.36094371		Thalassiosira	weissflogii	140214
37_M68_Alfred Burian		C18:3w3	1822	0.8	-40.2	C		T. Weis 2.1	algae	diatom	M	-18.36094371		Thalassiosira	weissflogii	140214
37_M68_Alfred Burian	18	C18:4w3	1922.4	1.64	-38.3	A		T. Weis 2.1	algae	diatom	M	-18.36094371		Thalassiosira	weissflogii	140214
37_M68_Alfred Burian	19	C21:0	1998	18.696	-32.968	A		T. Weis 2.1	algae	diatom	M	-18.36094371		Thalassiosira	weissflogii	140214
37_M68_Alfred Burian	20	C20:5w3	2270.6	21.223	-31.272	A		T. Weis 2.1	algae	diatom	M	-18.36094371		Thalassiosira	weissflogii	140214
37_M68_Alfred Burian	21	C22:6w3	2545.6	4.333	-32.376	A		T. Weis 2.1	algae	diatom	M	-18.36094371		Thalassiosira	weissflogii	140214
34_M09_Alfred Burian	5	C16:0	1073.8	4.572	-29.317	A		Chlor eme 3.1	algae	green	M	-16.48		Chlorella	emersonii	140214
34_M09_Alfred Burian		C16:1w9/7	1166	0.66	-26.9	T	1	Chlor eme 3.1	algae	green	M	-16.48		Chlorella	emersonii	140214
34_M09_Alfred Burian	6	C17:0	1252.7	3.92	-35.235	B		Chlor eme 3.1	algae	green	M	-16.48		Chlorella	emersonii	140214
34_M09_Alfred Burian	7	C16:4w3	1438.5	5.237	-30.109	B		Chlor eme 3.1	algae	green	M	-16.48		Chlorella	emersonii	140214
34_M09_Alfred Burian	8	C18:1w9c	1512.5	8.77	-26.851	B		Chlor eme 3.1	algae	green	M	-16.48		Chlorella	emersonii	140214
34_M09_Alfred Burian	9	C19:0	1635.8	27.023	-35.39	A		Chlor eme 3.1	algae	green	M	-16.48		Chlorella	emersonii	140214
34_M09_Alfred Burian		C18:2w6c	1653.4	0.6	-30.06	B		Chlor eme 3.1	algae	green	M	-16.48		Chlorella	emersonii	140214
34_M09_Alfred Burian	10	C18:3w3	1822.5	1.99	-28.26	A		Chlor eme 3.1	algae	green	M	-16.48		Chlorella	emersonii	140214
34_M09_Alfred Burian	11	C18:4w3	1922.2	2.033	-29.069	A		Chlor eme 3.1	algae	green	M	-16.48		Chlorella	emersonii	140214
34_M09_Alfred Burian	12	C21:0	1992.8	11.089	-32.368	A		Chlor eme 3.1	algae	green	M	-16.48		Chlorella	emersonii	140214
34_M09_Alfred Burian	13	C23:0	2268.3	3.287	-34.717	A		Chlor eme 3.1	algae	green	M	-16.48		Chlorella	emersonii	140214
34_M09_Alfred Burian	14	C24:1w9	2430.3	8.896	-36.216	A		Chlor eme 3.1	algae	green	M	-16.48		Chlorella	emersonii	140214
38_M43_Alfred Burian	5	C16:0	1076.8	12.754	-26.457	A		C vulg 1.1	algae	green	M	-16.65947576		Chlorella	vulgaris	140217
38_M43_Alfred Burian		C16:1w13	1145	0.415	-27.767	A		C vulg 1.1	algae	green	M	-16.65947576		Chlorella	vulgaris	140217
38_M43_Alfred Burian	6	C16:1w9/7	1167.9	3.357	-25.228	T	1	C vulg 1.1	algae	green	M	-16.65947576		Chlorella	vulgaris	140217
38_M43_Alfred Burian	7	C17:0	1253.2	4.932	-35.435	B		C vulg 1.1	algae	green	M	-16.65947576		Chlorella	vulgaris	140217
38_M43_Alfred Burian		C16:2w6	1277	0.5	-37.3	A		C vulg 1.1	algae	green	M	-16.65947576		Chlorella	vulgaris	140217
38_M43_Alfred Burian	8	C16:4w3	1444.2	2.916	-26.68	B		C vulg 1.1	algae	green	M	-16.65947576		Chlorella	vulgaris	140217
38_M43_Alfred Burian	9	C18:1w9c	1513.8	3.501	-27.335	A		C vulg 1.1	algae	green	M	-16.65947576		Chlorella	vulgaris	140217
38_M43_Alfred Burian		C18:1w7c	1529	0.6	-26.18	A		C vulg 1.1	algae	green	M	-16.65947576		Chlorella	vulgaris	140217
38_M43_Alfred Burian	10	C19:0	1632.7	17.139	-35.692	A		C vulg 1.1	algae	green	M	-16.65947576		Chlorella	vulgaris	140217
38_M43_Alfred Burian	11	C18:2w6c	1654	3.102	-26.266	A		C vulg 1.1	algae	green	M	-16.65947576		Chlorella	vulgaris	140217
38_M43_Alfred Burian	12	C18:3w3	1825	10.813	-24.853	A		C vulg 1.1	algae	green	M	-16.65947576		Chlorella	vulgaris	140217
38_M43_Alfred Burian	13	C21:0	1995.1	16.71	-31.972	A		C vulg 1.1	algae	green	M	-16.65947576		Chlorella	vulgaris	140217
38_M43_Alfred Burian	14	C23:0	2265.1	3.655	-33.227	A		C vulg 1.1	algae	green	M	-16.65947576		Chlorella	vulgaris	140217
38_M43_Alfred Burian		C24:1w9	2428.6	0.34	-41.34	C		C vulg 1.1	algae	green	M	-16.65947576		Chlorella	vulgaris	140217
31_M55_Alfred Burian	5	C16:0	1073.6	4.954	-27.235	F								Anabaenopsis	elenkinii	140217
31_M55_Alfred Burian		C17:0	1250	0.5	-38.2	F								Anabaenopsis	elenkinii	140217
31_M55_Alfred Burian	6	C19:0	1623.3	3.255	-40.425	F								Anabaenopsis	elenkinii	140217
31_M55_Alfred Burian	7	C21:0	1987	3.003	-32.011	F								Anabaenopsis	elenkinii	140217
31_M55_Alfred Burian	8	C24:1w9	2428.6	2.967	-35.599	F								Anabaenopsis	elenkinii	140217
39_M63_Alfred Burian	5	C14:0	752	7.724	-25.483	A		Chaet 2.1	algae	diatom	M	-14.38		Chaetocerus	old	140217
39_M63_Alfred Burian	6	C14:1	827.6	3.559	-22.999	A		Chaet 2.1	algae	diatom	M	-14.38		Chaetocerus	old	140217
39_M63_Alfred Burian	8	C16:0	1074.9	6.01	-30.7	A		Chaet 2.1	algae	diatom	M	-14.38		Chaetocerus	old	140217
39_M63_Alfred Burian	9	C16:1w9/7	1162.9	4.081	-25.085	T	1	Chaet 2.1	algae	diatom	M	-14.38		Chaetocerus	old	140217
39_M63_Alfred Burian	10	C17:0	1254.4	5.909	-38.762	A		Chaet 2.1	algae	diatom	M	-14.38		Chaetocerus	old	140217
39_M63_Alfred Burian		C16:2w4	1320	0.7	-30.1	A		Chaet 2.1	algae	diatom	M	-14.38		Chaetocerus	old	140217
39_M63_Alfred Burian	11	C18:0	1437.7	1.517	-30.862	A		Chaet 2.1	algae	diatom	M	-14.38		Chaetocerus	old	140217
39_M63_Alfred Burian	12	C18:1w9c	1513.6	1.632	-20.898	F		Chaet 2.1	algae	diatom	M	-14.38		Chaetocerus	old	140217
39_M63_Alfred Burian	13	C18:1w7c	1532.6	7.055	-16.934	F		Chaet 2.1	algae	diatom	M	-14.38		Chaetocerus	old	140217
39_M63_Alfred Burian	16	C19:0	1632.3	17.495	-34.747	F		Chaet 2.1	algae	diatom	M	-14.38		Chaetocerus	old	140217
39_M63_Alfred Burian	17	C18:2w6c	1653.4	6.448	-24.678	F		Chaet 2.1	algae	diatom	M	-14.38		Chaetocerus	old	140217
39_M63_Alfred Burian	18	C18:3w6	1759.2	47.596	-60.466	F		Chaet 2.1	algae	diatom	M	-14.38		Chaetocerus	old	140217
39_M63_Alfred Burian	19	C18:3w3	1822.1	0.932	-41.581	C		Chaet 2.1	algae	diatom	M	-14.38		Chaetocerus	old	140217
39_M63_Alfred Burian	20	C21:0	1995.9	14.537	-34.167	A		Chaet 2.1	algae	diatom	M	-14.38		Chaetocerus	old	140217
39_M63_Alfred Burian	21	C23:0	2266.6	4.62	-33.772	A		Chaet 2.1	algae	diatom	M	-14.38		Chaetocerus	old	140217
35_M25_Alfred Burian	5	C16:0	1080.3	23.034	-32.188	A		Nakuru 1.1	algae	cyano	M	-20.39463385		Nakuru		140217
35_M25_Alfred Burian	6	C16:1w9/7	1163.5	2.504	-31.371	T	1	Nakuru 1.1	algae	cyano	M	-20.39463385		Nakuru		140217
35_M25_Alfred Burian	7	C17:0	1252.3	2.241	-37.319	B		Nakuru 1.1	algae	cyano	M	-20.39463385		Nakuru		140217
35_M25_Alfred Burian		C18:0	1436	0.6	-36.2	A		Nakuru 1.1	algae	cyano	M	-20.39463385		Nakuru		140217
35_M25_Alfred Burian	8	C18:1w9c	1514	1.689	-30.42	E		Nakuru 1.1	algae	cyano	M	-20.39463385		Nakuru		140217
35_M25_Alfred Burian	9	C18:1w7c	1531.1	3.356	-25.103	E		Nakuru 1.1	algae	cyano	M	-20.39463385		Nakuru		140217
35_M25_Alfred Burian	9	C18:1w7c/9		5.045	-26.9	T	E	Nakuru 1.1	algae	cyano	M	-20.39463385		Nakuru		140217
35_M25_Alfred Burian	10	C19:0	1628.3	6.84	-35.99	A		Nakuru 1.1	algae	cyano	M	-20.39463385		Nakuru		140217
35_M25_Alfred Burian	11	C18:2w6c	1655.7	6.025	-30.795	A		Nakuru 1.1	algae	cyano	M	-20.39463385		Nakuru		140217
35_M25_Alfred Burian	12	C18:3w6	1753.3	6.191	-33.658	A		Nakuru 1.1	algae	cyano	M	-20.39463385		Nakuru		140217
35_M25_Alfred Burian	13	C18:3w3	1822.7	2.586	-39.007	A		Nakuru 1.1	algae	cyano	M	-20.39463385		Nakuru		140217
35_M25_Alfred Burian	14	C18:4w3	1922	1.358	-44.265	A		Nakuru 1.1	algae	cyano	M	-20.39463385		Nakuru		140217
35_M25_Alfred Burian	15	C21:0	1990.7	6.288	-34.507	A		Nakuru 1.1	algae	cyano	M	-20.39463385		Nakuru		140217
35_M25_Alfred Burian		C20:3w6	2088	0.6	-37.77	A		Nakuru 1.1	algae	cyano	M	-20.39463385		Nakuru		140217
42_M49_Alfred Burian	6	C16:0	1079.5	18.96	-29.686	B		Scen 2.1	algae	green	M	-20.1967998		Scenedesmus		140217
42_M49_Alfred Burian		C16:1w13	1146	0.567	-30.8	A		Scen 2.1	algae	green	M	-20.1967998		Scenedesmus		140217
42_M49_Alfred Burian	7	C16:1w9/7	1169.1	3.26	-32.115	T	1	Scen 2.1	algae	green	M	-20.1967998		Scenedesmus		140217
42_M49_Alfred Burian	8	C17:0	1255.9	8.166	-39.478	B		Scen 2.1	algae	green	M	-20.1967998		Scenedesmus		140217
42_M49_Alfred Burian		C18:0	1438	1.2	-33.3	B		Scen 2.1	algae	green	M	-20.1967998		Scenedesmus		140217
42_M49_Alfred Burian	9	C18:1w9c	1516.7	7.918	-30.841	E		Scen 2.1	algae	green	M	-20.1967998		Scenedesmus		140217
42_M49_Alfred Burian	10	C18:1w7c	1531.1	2.3	-28.26	E		Scen 2.1	algae	green	M	-20.1967998		Scenedesmus		140217
42_M49_Alfred Burian		C18:1w7c/9		10.218	-30.25	T	E	Scen 2.1	algae	green	M	-20.1967998		Scenedesmus		140217
42_M49_Alfred Burian	11	C19:0	1634	17.913	-36.398	A		Scen 2.1	algae	green	M	-20.1967998		Scenedesmus		140217
42_M49_Alfred Burian	12	C18:2w6c	1654.4	1.891	-30.218	A		Scen 2.1	algae	green	M	-20.1967998		Scenedesmus		140217
42_M49_Alfred Burian	13	C18:3w3	1823.7	4.378	-32.989	A		Scen 2.1	algae	green	M	-20.1967998		Scenedesmus		140217
42_M49_Alfred Burian	14	C21:0	1997.2	17.724	-33.189	A		Scen 2.1	algae	green	M	-20.1967998		Scenedesmus		140217
42_M49_Alfred Burian	15	C23:0	2267.4	4.057	-36.557	A		Scen 2.1	algae	green	M	-20.1967998		Scenedesmus		140217
44_M11_Alfred Burian	5	C16:0	1080.9	21.898	-26.095	B		C vulg 3.1	algae	green	M	-16.58084731		Chlorella	vulgaris	140217
44_M11_Alfred Burian	6	C16:1w9/7	1170.4	5.291	-26.171	T	1	C vulg 3.1	algae	green	M	-16.58084731		Chlorella	vulgaris	140217
44_M11_Alfred Burian	7	C17:0	1255.5	5.229	-39.675	B		C vulg 3.1	algae	green	M	-16.58084731		Chlorella	vulgaris	140217
44_M11_Alfred Burian	8	C16:2w6	1279.3	0.839	-30.174	A		C vulg 3.1	algae	green	M	-16.58084731		Chlorella	vulgaris	140217
44_M11_Alfred Burian	9	C16:4w3	1446.3	7.301	-27.369	B		C vulg 3.1	algae	green	M	-16.58084731		Chlorella	vulgaris	140217
44_M11_Alfred Burian	10	C18:1w9c	1517.1	5.772	-28.147	E		C vulg 3.1	algae	green	M	-16.58084731		Chlorella	vulgaris	140217
44_M11_Alfred Burian		C18:1w7c	1531	0.8	-22.1	E		C vulg 3.1	algae	green	M	-16.58084731		Chlorella	vulgaris	140217
44_M11_Alfred Burian		C18:1w7c/9	1531	6.572	-27.145	T	E	C vulg 3.1	algae	green	M	-16.58084731		Chlorella	vulgaris	140217
44_M11_Alfred Burian	11	C19:0	1635.4	15.5	-36.549	A		C vulg 3.1	algae	green	M	-16.58084731		Chlorella	vulgaris	140217
44_M11_Alfred Burian	12	C18:2w6c	1656.5	5.161	-26.673	A		C vulg 3.1	algae	green	M	-16.58084731		Chlorella	vulgaris	140217
44_M11_Alfred Burian	13	C18:3w3	1829.4	19.763	-26.703	A		C vulg 3.1	algae	green	M	-16.58084731		Chlorella	vulgaris	140217
44_M11_Alfred Burian	14	C21:0	2002.8	31.792	-32.456	A		C vulg 3.1	algae	green	M	-16.58084731		Chlorella	vulgaris	140217
44_M11_Alfred Burian	15	C23:0	2267.4	3.877	-35.647	A		C vulg 3.1	algae	green	M	-16.58084731		Chlorella	vulgaris	140217
43_M16_Alfred Burian	5	C16:0	1079.9	17.898	-28.608	B		Anab vir 2.1	algae	cyano	M	-14.18		Anabaena	vulgaris	140217
43_M16_Alfred Burian	6	C16:1w9/7	1166.8	11.959	-30.285	T	1	Anab vir 2.1	algae	cyano	M	-14.18		Anabaena	vulgaris	140217
43_M16_Alfred Burian	7	C17:0	1254	3.828	-38.443	A		Anab vir 2.1	algae	cyano	M	-14.18		Anabaena	vulgaris	140217
43_M16_Alfred Burian	8	C16:2w4	1321.7	2.009	-34.095	A		Anab vir 2.1	algae	cyano	M	-14.18		Anabaena	vulgaris	140217
43_M16_Alfred Burian		C16:4w3	1438	0.9	-37.9	A		Anab vir 2.1	algae	cyano	M	-14.18		Anabaena	vulgaris	140217
43_M16_Alfred Burian		C16:4w1	1461	0.8	-38.04	A		Anab vir 2.1	algae	cyano	M	-14.18		Anabaena	vulgaris	140217
43_M16_Alfred Burian	9	C18:1w9c	1514.8	2.103	-27.1	B		Anab vir 2.1	algae	cyano	M	-14.18		Anabaena	vulgaris	140217
43_M16_Alfred Burian	10	C18:1w7c	1530.9	1.948	-28	B		Anab vir 2.1	algae	cyano	M	-14.18		Anabaena	vulgaris	140217
43_M16_Alfred Burian	11	C19:0	1632.9	13.458	-41.587	D		Anab vir 2.1	algae	cyano	M	-14.18		Anabaena	vulgaris	140217
43_M16_Alfred Burian	12	C18:2w6c	1655.5	8.874	-68.911	D		Anab vir 2.1	algae	cyano	M	-14.18		Anabaena	vulgaris	140217
43_M16_Alfred Burian	13	C18:3w3	1829.2	21.597	-31.781	A		Anab vir 2.1	algae	cyano	M	-14.18		Anabaena	vulgaris	140217
43_M16_Alfred Burian	14	C21:0	1999.1	21.817	-32.91	B		Anab vir 2.1	algae	cyano	M	-14.18		Anabaena	vulgaris	140217
43_M16_Alfred Burian	15	C23:0	2266.4	3.361	-34.135	A		Anab vir 2.1	algae	cyano	M	-14.18		Anabaena	vulgaris	140217
50_M71_Alfred Burian	7	C16:0	1078.2	15.532	-27.893	B		Sel second take 100ml 3	algae	green	M	-15.29683479		Selenastrum		140218
50_M71_Alfred Burian		C16:1w13	1145	0.55	-28.8	A		Sel second take 100ml 3	algae	green	M	-15.29683479		Selenastrum		140218
50_M71_Alfred Burian	8	C16:1w9/7	1168.3	2.961	-26.633	T	1	Sel second take 100ml 3	algae	green	M	-15.29683479		Selenastrum		140218
50_M71_Alfred Burian	9	C17:0	1253.4	3.508	-34.493	A		Sel second take 100ml 3	algae	green	M	-15.29683479		Selenastrum		140218
50_M71_Alfred Burian		C16:4w3	1443	1.2	-29.09	B		Sel second take 100ml 3	algae	green	M	-15.29683479		Selenastrum		140218
50_M71_Alfred Burian	10	C18:1w9c	1513.4	16.574	-26.52	E		Sel second take 100ml 3	algae	green	M	-15.29683479		Selenastrum		140218
50_M71_Alfred Burian		C18:1w7c	1530	0.9	-24.6	E		Sel second take 100ml 3	algae	green	M	-15.29683479		Selenastrum		140218
50_M71_Alfred Burian		C18:1w7c/9		17.474	-26.3	T	E	Sel second take 100ml 3	algae	green	M	-15.29683479		Selenastrum		140218
50_M71_Alfred Burian	11	C19:0	1629.2	6.613	-35.47	A		Sel second take 100ml 3	algae	green	M	-15.29683479		Selenastrum		140218
50_M71_Alfred Burian	12	C18:2w6c	1655.1	4.471	-27.161	A		Sel second take 100ml 3	algae	green	M	-15.29683479		Selenastrum		140218
50_M71_Alfred Burian	13	C18:3w3	1827.9	19.743	-26.61	A		Sel second take 100ml 3	algae	green	M	-15.29683479		Selenastrum		140218
50_M71_Alfred Burian	14	C18:4w3	1922.6	2.826	-28.842	A		Sel second take 100ml 3	algae	green	M	-15.29683479		Selenastrum		140218
50_M71_Alfred Burian	15	C21:0	1992	8.373	-32.7	A		Sel second take 100ml 3	algae	green	M	-15.29683479		Selenastrum		140218
50_M71_Alfred Burian	16	C23:0	2264.3	1.693	-34.538	A		Sel second take 100ml 3	algae	green	M	-15.29683479		Selenastrum		140218
66_T48_Alfred Burian		C14:0	880	0.8	-26.89	A		Scen 1.1	algae	green	T	-20.1967998		Scenedesmus		140219	Anabaena	vulgaris
66_T48_Alfred Burian	7	C16:0	1196.9	5.163	-28.742	A		Scen 1.1	algae	green	T	-20.1967998		Scenedesmus		140219	Anabaena	vulgaris
66_T48_Alfred Burian		C16:1w13	1265	0.28	-29.8	B		Scen 1.1	algae	green	T	-20.1967998		Scenedesmus		140219	Anabaena	vulgaris
66_T48_Alfred Burian		C16:1w9/7	1288	0.5	-27.5	T	1	Scen 1.1	algae	green	T	-20.1967998		Scenedesmus		140219	Anabaena	vulgaris
66_T48_Alfred Burian		C16:3w3	1466	0.38	-27.2	B		Scen 1.1	algae	green	T	-20.1967998		Scenedesmus		140219	Anabaena	vulgaris
66_T48_Alfred Burian		C16:4w3	1557	0.6	-32.1	A		Scen 1.1	algae	green	T	-20.1967998		Scenedesmus		140219	Anabaena	vulgaris
66_T48_Alfred Burian	8	C18:1w9c	1635.2	3.967	-30.028	A		Scen 1.1	algae	green	T	-20.1967998		Scenedesmus		140219	Anabaena	vulgaris
66_T48_Alfred Burian		C18:1w7c	1650	0.5	-28.6	A		Scen 1.1	algae	green	T	-20.1967998		Scenedesmus		140219	Anabaena	vulgaris
66_T48_Alfred Burian	9	C19:0	1744.5	1.296	-32.865	A		Scen 1.1	algae	green	T	-20.1967998		Scenedesmus		140219	Anabaena	vulgaris
66_T48_Alfred Burian		C18:2w6c	1774	0.6	-30.8	A		Scen 1.1	algae	green	T	-20.1967998		Scenedesmus		140219	Anabaena	vulgaris
66_T48_Alfred Burian	10	C18:3w3	1942.9	2.231	-31.101	A		Scen 1.1	algae	green	T	-20.1967998		Scenedesmus		140219	Anabaena	vulgaris
66_T48_Alfred Burian	11	C21:0	2108	1.865	-31.973	A		Scen 1.1	algae	green	T	-20.1967998		Scenedesmus		140219	Anabaena	vulgaris
68_T16_Alfred Burian	8	C16:0	1081.2	21.702	-27.2	B		Anab vir 2.1	algae	cyano	T	-14.18		Anabaena	vulgaris	140219
68_T16_Alfred Burian	9	C16:1w9/7	1168.7	19.129	-29.447	T	1	Anab vir 2.1	algae	cyano	T	-14.18		Anabaena	vulgaris	140219
68_T16_Alfred Burian	10	C16:2w4	1321.9	3.236	-31.372	A		Anab vir 2.1	algae	cyano	T	-14.18		Anabaena	vulgaris	140219
68_T16_Alfred Burian		C16:4w1	1461	0.8	-32.5	A		Anab vir 2.1	algae	cyano	T	-14.18		Anabaena	vulgaris	140219
68_T16_Alfred Burian	11	C18:1w9c	1515	2.012	-24.052	A		Anab vir 2.1	algae	cyano	T	-14.18		Anabaena	vulgaris	140219
68_T16_Alfred Burian	12	C18:1w7c	1531.3	1.676	-25.662	A		Anab vir 2.1	algae	cyano	T	-14.18		Anabaena	vulgaris	140219
68_T16_Alfred Burian	13	C19:0	1627.3	1.448	-34.857	A		Anab vir 2.1	algae	cyano	T	-14.18		Anabaena	vulgaris	140219
68_T16_Alfred Burian	14	C18:2w6c	1656.1	5.968	-26.968	A		Anab vir 2.1	algae	cyano	T	-14.18		Anabaena	vulgaris	140219
68_T16_Alfred Burian	15	C18:3w3	1831.7	36.978	-30.002	A		Anab vir 2.1	algae	cyano	T	-14.18		Anabaena	vulgaris	140219
68_T16_Alfred Burian	16	C21:0	1988	2.045	-33.041	A		Anab vir 2.1	algae	cyano	T	-14.18		Anabaena	vulgaris	140219
67_T11_Alfred Burian	6	C16:0	1077	10.966	-24.867	B		C vulg 1.1	algae	green	T	-16.65947576		Chlorella	vulgaris	140219
67_T11_Alfred Burian		C16:1w13		0.3	-25.7	B		C vulg 1.1	algae	green	T	-16.65947576		Chlorella	vulgaris	140219
67_T11_Alfred Burian	7	C16:1w9/7	1168.3	2.428	-23.536	T	1	C vulg 1.1	algae	green	T	-16.65947576		Chlorella	vulgaris	140219
67_T11_Alfred Burian		C17:0	1248	0.6	-27.6	A		C vulg 1.1	algae	green	T	-16.65947576		Chlorella	vulgaris	140219
67_T11_Alfred Burian		C18:0		2	-17.9	E		C vulg 1.1	algae	green	T	-16.65947576		Chlorella	vulgaris	140219
67_T11_Alfred Burian	8	C16:4w3	1444.4	4.1	-24.9	E		C vulg 1.1	algae	green	T	-16.65947576		Chlorella	vulgaris	140219
67_T11_Alfred Burian	8	C16:4w3/C18:0	1444.4	6.1	-23.867	T	E	C vulg 1.1	algae	green	T	-16.65947576		Chlorella	vulgaris	140219
67_T11_Alfred Burian	9	C18:1w9c	1514	2.44	-26.545	A		C vulg 1.1	algae	green	T	-16.65947576		Chlorella	vulgaris	140219
67_T11_Alfred Burian		C19:0		0.6		D		C vulg 1.1	algae	green	T	-16.65947576		Chlorella	vulgaris	140219
67_T11_Alfred Burian	10	C18:2w6c	1653.6	2.119	-25.778	A		C vulg 1.1	algae	green	T	-16.65947576		Chlorella	vulgaris	140219
67_T11_Alfred Burian	11	C18:3w3	1824.8	9.771	-24.948	A		C vulg 1.1	algae	green	T	-16.65947576		Chlorella	vulgaris	140219
67_T11_Alfred Burian	12	C21:0	1987.4	1.894	-31.429	A		C vulg 1.1	algae	green	T	-16.65947576		Chlorella	vulgaris	140219
10_M63_Alfred Burian	5	C14:0	750.7	1.92	-26.682	A		E. Hux cal 1.1	algae	hapto	M	-10.20975844		Emiliana	huxleyi cal	140213	Chaetocerus	old
10_M63_Alfred Burian	8	C16:0	1073.4	4.24	-30.951	A		E. Hux cal 1.1	algae	hapto	M	-10.20975844		Emiliana	huxleyi cal	140213	Chaetocerus	old
10_M63_Alfred Burian	9	C16:1w9/7	1161.4	0.867	-27.038	T	1	E. Hux cal 1.1	algae	hapto	M	-10.20975844		Emiliana	huxleyi cal	140213	Chaetocerus	old
10_M63_Alfred Burian	10	C17:0	1251.9	3.511	-35.593	A		E. Hux cal 1.1	algae	hapto	M	-10.20975844		Emiliana	huxleyi cal	140213	Chaetocerus	old
10_M63_Alfred Burian	11	C18:0	1436.2	1.971	-31.384	A		E. Hux cal 1.1	algae	hapto	M	-10.20975844		Emiliana	huxleyi cal	140213	Chaetocerus	old
10_M63_Alfred Burian	12	C18:1w9c	1513.2	1.849	-27.502	A		E. Hux cal 1.1	algae	hapto	M	-10.20975844		Emiliana	huxleyi cal	140213	Chaetocerus	old
10_M63_Alfred Burian	13	C18:1w7c	1530.3	3.375	-21.373	A		E. Hux cal 1.1	algae	hapto	M	-10.20975844		Emiliana	huxleyi cal	140213	Chaetocerus	old
10_M63_Alfred Burian	14	C19:0	1627.9	9.438	-36.087	A		E. Hux cal 1.1	algae	hapto	M	-10.20975844		Emiliana	huxleyi cal	140213	Chaetocerus	old
10_M63_Alfred Burian		C18:3w3	1812	0.59	-35.5	A		E. Hux cal 1.1	algae	hapto	M	-10.20975844		Emiliana	huxleyi cal	140213	Chaetocerus	old
10_M63_Alfred Burian	15	C18:4w3	1921.5	1.012	-30.965	A		E. Hux cal 1.1	algae	hapto	M	-10.20975844		Emiliana	huxleyi cal	140213	Chaetocerus	old
10_M63_Alfred Burian	16	C21:0	1992	10.893	-32.902	A		E. Hux cal 1.1	algae	hapto	M	-10.20975844		Emiliana	huxleyi cal	140213	Chaetocerus	old
10_M63_Alfred Burian	17	C20:5w3	2262	1.43	-34.634	A		E. Hux cal 1.1	algae	hapto	M	-10.20975844		Emiliana	huxleyi cal	140213	Chaetocerus	old
10_M63_Alfred Burian	18	C22:6w3	2545.2	0.999	-28.612	A		E. Hux cal 1.1	algae	hapto	M	-10.20975844		Emiliana	huxleyi cal	140213	Chaetocerus	old
86_T67_Alfred Burian	7	C16:0	1075.9	20.834	-43.6	B		D. Sal 1.1	algae	green	T	-32.28708064		Dunaliella	salina	140220
86_T67_Alfred Burian	9	C16:1w9/7	1171.4	3.297	-45.346	T	1	D. Sal 1.1	algae	green	T	-32.28708064		Dunaliella	salina	140220
86_T67_Alfred Burian	10	C16:2w6	1281.6	5.603	-39.421	A		D. Sal 1.1	algae	green	T	-32.28708064		Dunaliella	salina	140220
86_T67_Alfred Burian	11	C16:3w4	1350.1	7.961	-50.44	C		D. Sal 1.1	algae	green	T	-32.28708064		Dunaliella	salina	140220
86_T67_Alfred Burian	13	C16:4w3	1446.5	5.17	-45.258	A		D. Sal 1.1	algae	green	T	-32.28708064		Dunaliella	salina	140220
86_T67_Alfred Burian	14	C18:1w9c	1518.4	35.281	-48.667	E		D. Sal 1.1	algae	green	T	-32.28708064		Dunaliella	salina	140220
86_T67_Alfred Burian	15	C18:1w7c	1535.3	3.609	-42.546	E		D. Sal 1.1	algae	green	T	-32.28708064		Dunaliella	salina	140220
86_T67_Alfred Burian	16	C18:1w7c/9		38.89	-48.044	T	E	D. Sal 1.1	algae	green	T	-32.28708064		Dunaliella	salina	140220
86_T67_Alfred Burian	16	C18:2w6c	1663	22.483	-39.054	A		D. Sal 1.1	algae	green	T	-32.28708064		Dunaliella	salina	140220
86_T67_Alfred Burian	17	C18:3w6	1756.9	10.922	-57.698	A		D. Sal 1.1	algae	green	T	-32.28708064		Dunaliella	salina	140220
86_T67_Alfred Burian	18	C18:3w3	1838.4	68.184	-50.555	A		D. Sal 1.1	algae	green	T	-32.28708064		Dunaliella	salina	140220
86_T67_Alfred Burian	19	C18:4w3	1924.5	0.953	-65.175	B		D. Sal 1.1	algae	green	T	-32.28708064		Dunaliella	salina	140220
86_T67_Alfred Burian	20	C21:0	1989.1	1.469	-36.382	A		D. Sal 1.1	algae	green	T	-32.28708064		Dunaliella	salina	140220
91_T75_Alfred Burian	7	C16:0	1078.2	9.82	-35.143	A		D. Tert 2nd take 80 ml 3	algae	green	T	-21.58846956		Dunaliella	tertiolecta	140220
91_T75_Alfred Burian		C16:1w9/7	1169	1.7	-33.4	T	1	D. Tert 2nd take 80 ml 3	algae	green	T	-21.58846956		Dunaliella	tertiolecta	140220
91_T75_Alfred Burian	8	C16:4w3	1445	2.863	-35.757	B		D. Tert 2nd take 80 ml 3	algae	green	T	-21.58846956		Dunaliella	tertiolecta	140220
91_T75_Alfred Burian	9	C18:1w9c	1515.7	19.128	-40.807	E		D. Tert 2nd take 80 ml 3	algae	green	T	-21.58846956		Dunaliella	tertiolecta	140220
91_T75_Alfred Burian		C18:1w7c	1531	1	-31.5	E		D. Tert 2nd take 80 ml 3	algae	green	T	-21.58846956		Dunaliella	tertiolecta	140220
91_T75_Alfred Burian		C18:1w7c/9		20.128	-40.3	T	E	D. Tert 2nd take 80 ml 3	algae	green	T	-21.58846956		Dunaliella	tertiolecta	140220
91_T75_Alfred Burian	10	C18:2w6c	1655.1	1.032	-37.493	A		D. Tert 2nd take 80 ml 3	algae	green	T	-21.58846956		Dunaliella	tertiolecta	140220
91_T75_Alfred Burian	11	C18:3w6	1752.7	1.912	-45.72	A		D. Tert 2nd take 80 ml 3	algae	green	T	-21.58846956		Dunaliella	tertiolecta	140220
91_T75_Alfred Burian	12	C18:3w3	1832.7	39.387	-39.788	A		D. Tert 2nd take 80 ml 3	algae	green	T	-21.58846956		Dunaliella	tertiolecta	140220
91_T75_Alfred Burian	13	C18:4w3	1923.4	1.743	-50.144	A		D. Tert 2nd take 80 ml 3	algae	green	T	-21.58846956		Dunaliella	tertiolecta	140220
91_T75_Alfred Burian	14	C21:0	1988.8	1.305	-38.28	A		D. Tert 2nd take 80 ml 3	algae	green	T	-21.58846956		Dunaliella	tertiolecta	140220
82_T61_Alfred Burian	9	C16:0	1081.6	21.566	-36.104	C		Ana Kiel 1.1 B+A	algae	cyano	T	-19.34		Anabaena	Kiel	140220	Anabaena	Kiel
82_T61_Alfred Burian	10	C16:1w9/7	1167.7	12.544	-32.515	T	1	Ana Kiel 1.1 B+A	algae	cyano	T	-19.34		Anabaena	Kiel	140220	Anabaena	Kiel
82_T61_Alfred Burian		C16:2w4	1321	0.65	-31.8	A		Ana Kiel 1.1 B+A	algae	cyano	T	-19.34		Anabaena	Kiel	140220	Anabaena	Kiel
82_T61_Alfred Burian	11	C18:0	1442.3	2.31	-34.859	A		Ana Kiel 1.1 B+A	algae	cyano	T	-19.34		Anabaena	Kiel	140220	Anabaena	Kiel
82_T61_Alfred Burian	12	C18:1w9c	1518.2	5.475	-38.674	E		Ana Kiel 1.1 B+A	algae	cyano	T	-19.34		Anabaena	Kiel	140220	Anabaena	Kiel
82_T61_Alfred Burian	13	C18:1w7c	1536.8	11.55	-29.35	E		Ana Kiel 1.1 B+A	algae	cyano	T	-19.34		Anabaena	Kiel	140220	Anabaena	Kiel
82_T61_Alfred Burian	13	C18:1w7c/9	1536.8	17.025	-32.3	T	E	Ana Kiel 1.1 B+A	algae	cyano	T	-19.34		Anabaena	Kiel	140220	Anabaena	Kiel
82_T61_Alfred Burian	14	C19:0	1627.1	1.544	-38.111	A		Ana Kiel 1.1 B+A	algae	cyano	T	-19.34		Anabaena	Kiel	140220	Anabaena	Kiel
82_T61_Alfred Burian	15	C18:2w6c	1658.6	9.388	-36.383	A		Ana Kiel 1.1 B+A	algae	cyano	T	-19.34		Anabaena	Kiel	140220	Anabaena	Kiel
82_T61_Alfred Burian	16	C18:3w3	1826.9	11.989	-33.569	A		Ana Kiel 1.1 B+A	algae	cyano	T	-19.34		Anabaena	Kiel	140220	Anabaena	Kiel
82_T61_Alfred Burian	17	C21:0	1989.7	2.025	-36.965	A		Ana Kiel 1.1 B+A	algae	cyano	T	-19.34		Anabaena	Kiel	140220	Anabaena	Kiel
85_T50_Alfred Burian	7	C16:0	1081.6	21.349	-35.76	B		Tetra 1.1	algae	green	T	-22.91531202		Tetraselmis	pelliculosa	140220
85_T50_Alfred Burian		C16:1w13	1147	0.6	-38.9	A		Tetra 1.1	algae	green	T	-22.91531202		Tetraselmis	pelliculosa	140220
85_T50_Alfred Burian	8	C16:1w9/7	1164.1	0.995	-34.9	T	1	Tetra 1.1	algae	green	T	-22.91531202		Tetraselmis	pelliculosa	140220
85_T50_Alfred Burian	9	C16:4w3	1443.8	2.392	-38.34	A		Tetra 1.1	algae	green	T	-22.91531202		Tetraselmis	pelliculosa	140220
85_T50_Alfred Burian	10	C18:1w9c	1514.6	20.199	-39.492	E		Tetra 1.1	algae	green	T	-22.91531202		Tetraselmis	pelliculosa	140220
85_T50_Alfred Burian	11	C18:1w7c	1533.6	4.018	-36.58	E		Tetra 1.1	algae	green	T	-22.91531202		Tetraselmis	pelliculosa	140220
85_T50_Alfred Burian		C18:1w7c/9		24.217	-39.065	T	E	Tetra 1.1	algae	green	T	-22.91531202		Tetraselmis	pelliculosa	140220
85_T50_Alfred Burian	12	C19:0	1627.5	1.895	-37.293	A		Tetra 1.1	algae	green	T	-22.91531202		Tetraselmis	pelliculosa	140220
85_T50_Alfred Burian	13	C18:2w6c	1655.9	3.323	-39.014	A		Tetra 1.1	algae	green	T	-22.91531202		Tetraselmis	pelliculosa	140220
85_T50_Alfred Burian	14	C18:3w6	1752.9	2.995	-35.589	A		Tetra 1.1	algae	green	T	-22.91531202		Tetraselmis	pelliculosa	140220
85_T50_Alfred Burian	15	C18:3w3	1827.5	14.774	-41.165	A		Tetra 1.1	algae	green	T	-22.91531202		Tetraselmis	pelliculosa	140220
85_T50_Alfred Burian	16	C20:1w9	1886	1.415	-44.813	A		Tetra 1.1	algae	green	T	-22.91531202		Tetraselmis	pelliculosa	140220
85_T50_Alfred Burian	17	C18:4w3	1924.7	7.67	-41.722	A		Tetra 1.1	algae	green	T	-22.91531202		Tetraselmis	pelliculosa	140220
85_T50_Alfred Burian	18	C21:0	1990.3	2.572	-34.961	A		Tetra 1.1	algae	green	T	-22.91531202		Tetraselmis	pelliculosa	140220
85_T50_Alfred Burian	19	C18:5w3	2035.9	1.308	-45.654	A		Tetra 1.1	algae	green	T	-22.91531202		Tetraselmis	pelliculosa	140220
85_T50_Alfred Burian		C20:3w3+C20:4w6+C22:0	2143	0.88	-41.8	A		Tetra 1.1	algae	green	T	-22.91531202		Tetraselmis	pelliculosa	140220
85_T50_Alfred Burian	20	C20:5w3	2268.9	6.85	-38.803	A		Tetra 1.1	algae	green	T	-22.91531202		Tetraselmis	pelliculosa	140220
88_T52_Alfred Burian	5	C14:0	753	3.626	-22.57	A		Navi 2.1	algae	diatom	T	-14.62348355		Navicula	pelliculosa	140220
88_T52_Alfred Burian	7	C16:0	1088.9	39.509	-22.53	A		Navi 2.1	algae	diatom	T	-14.62348355		Navicula	pelliculosa	140220
88_T52_Alfred Burian	8	C16:1w9/7	1180.8	87.101	-23.172	T	1	Navi 2.1	algae	diatom	T	-14.62348355		Navicula	pelliculosa	140220
88_T52_Alfred Burian	9	C16:2w7	1271.3	2.032	-26.481	A		Navi 2.1	algae	diatom	T	-14.62348355		Navicula	pelliculosa	140220
88_T52_Alfred Burian	10	C16:2w4	1324.2	1.837	-33.103	A		Navi 2.1	algae	diatom	T	-14.62348355		Navicula	pelliculosa	140220
88_T52_Alfred Burian	11	C16:3w3	1426.6	2.719	-34.591	A		Navi 2.1	algae	diatom	T	-14.62348355		Navicula	pelliculosa	140220
88_T52_Alfred Burian	13	C18:1w9c	1515.7	1.042	-32.385	A		Navi 2.1	algae	diatom	T	-14.62348355		Navicula	pelliculosa	140220
88_T52_Alfred Burian		C18:1w7c	1532	0.6	-27.45	A		Navi 2.1	algae	diatom	T	-14.62348355		Navicula	pelliculosa	140220
88_T52_Alfred Burian	14	C20:3w3+C20:4w6+C22:0	2143.3	1.236	-31.531	A		Navi 2.1	algae	diatom	T	-14.62348355		Navicula	pelliculosa	140220
88_T52_Alfred Burian	15	C20:5w3	2272.2	22.316	-26.887	A		Navi 2.1	algae	diatom	T	-14.62348355		Navicula	pelliculosa	140220
89_T71_Alfred Burian	8	C16:0	1082.2	20.624	-26.467	C		Sel second take 100ml 3	algae	green	T	-15.29683479		Selenastrum		140220
89_T71_Alfred Burian		C16:1w13	1148	0.78	-27.78	A		Sel second take 100ml 3	algae	green	T	-15.29683479		Selenastrum		140220
89_T71_Alfred Burian	9	C16:1w9/7	1170.6	2.732	-27.36	T	1	Sel second take 100ml 3	algae	green	T	-15.29683479		Selenastrum		140220
89_T71_Alfred Burian	10	C16:1w5	1186.3	1.402	-49.653	A		Sel second take 100ml 3	algae	green	T	-15.29683479		Selenastrum		140220
89_T71_Alfred Burian		C16:2w6	1279	0.5	-27.6	A		Sel second take 100ml 3	algae	green	T	-15.29683479		Selenastrum		140220
89_T71_Alfred Burian	11	C16:4w3	1444.8	2.675	-29.989	A		Sel second take 100ml 3	algae	green	T	-15.29683479		Selenastrum		140220
89_T71_Alfred Burian	12	C18:1w9c	1517.1	31.371	-27.6	C		Sel second take 100ml 3	algae	green	T	-15.29683479		Selenastrum		140220
89_T71_Alfred Burian	14	C19:0	1630.8	2.046	-38.286	A		Sel second take 100ml 3	algae	green	T	-15.29683479		Selenastrum		140220
89_T71_Alfred Burian	15	C18:2w6c	1658.4	6.475	-29.246	A		Sel second take 100ml 3	algae	green	T	-15.29683479		Selenastrum		140220
89_T71_Alfred Burian	16	C18:3w3	1834	41.091	-27.725	A		Sel second take 100ml 3	algae	green	T	-15.29683479		Selenastrum		140220
89_T71_Alfred Burian	17	C18:4w3	1925.7	6.467	-31.927	A		Sel second take 100ml 3	algae	green	T	-15.29683479		Selenastrum		140220
89_T71_Alfred Burian	18	C21:0	1990.9	2.603	-37.768	A		Sel second take 100ml 3	algae	green	T	-15.29683479		Selenastrum		140220
89_T71_Alfred Burian	19	C22:0	2137.7	1.066	-28.614	A		Sel second take 100ml 3	algae	green	T	-15.29683479		Selenastrum		140220
89_T71_Alfred Burian		C24:0	2381	0.7	-30.4	A		Sel second take 100ml 3	algae	green	T	-15.29683479		Selenastrum		140220
90_T72_Alfred Burian	5	C14:0	755.5	17.748	-27.65	A		T. Weis 1.1	algae	diatom	T	-18.36094371		Thalassiosira	weissflogii	140220	?
90_T72_Alfred Burian	7	C16:0	1091.4	57.433	-27.724	A		T. Weis 1.1	algae	diatom	T	-18.36094371		Thalassiosira	weissflogii	140220	?
90_T72_Alfred Burian	8	C16:1w9/7	1180.2	72.009	-28.4	T	1	T. Weis 1.1	algae	diatom	T	-18.36094371		Thalassiosira	weissflogii	140220	?
90_T72_Alfred Burian	10	C16:2w4	1325.3	4.645	-33.587	A		T. Weis 1.1	algae	diatom	T	-18.36094371		Thalassiosira	weissflogii	140220	?
90_T72_Alfred Burian	11	C16:3w3	1427.5	5.851	-35.793	A		T. Weis 1.1	algae	diatom	T	-18.36094371		Thalassiosira	weissflogii	140220	?
90_T72_Alfred Burian		C18:1w9c	1515	0.7	-39.5	E		T. Weis 1.1	algae	diatom	T	-18.36094371		Thalassiosira	weissflogii	140220	?
90_T72_Alfred Burian	12	C18:1w7c	1533.4	2.618	-28.3	E		T. Weis 1.1	algae	diatom	T	-18.36094371		Thalassiosira	weissflogii	140220	?
90_T72_Alfred Burian		C18:1w7c/9		3.318	-30.3	T	E	T. Weis 1.1	algae	diatom	T	-18.36094371		Thalassiosira	weissflogii	140220	?
90_T72_Alfred Burian	13	C18:2w6c	1655.5	1.298	-35.147	A		T. Weis 1.1	algae	diatom	T	-18.36094371		Thalassiosira	weissflogii	140220	?
90_T72_Alfred Burian	14	C18:3w3	1823.5	1.251	-40.138	A		T. Weis 1.1	algae	diatom	T	-18.36094371		Thalassiosira	weissflogii	140220	?
90_T72_Alfred Burian	15	C18:4w3	1924.1	4.387	-34.681	A		T. Weis 1.1	algae	diatom	T	-18.36094371		Thalassiosira	weissflogii	140220	?
90_T72_Alfred Burian	16	C20:5w3	2271	15.103	-33.848	A		T. Weis 1.1	algae	diatom	T	-18.36094371		Thalassiosira	weissflogii	140220	?
90_T72_Alfred Burian	17	C22:6w3	2546	1.758	-27.866	A		T. Weis 1.1	algae	diatom	T	-18.36094371		Thalassiosira	weissflogii	140220	?
51_M13_Alfred Burian	7	C16:0	1080.1	20.169	-34.75	B		Cori 1.1	algae	green	M	-23.74690595		Coricystis	minor	140218
51_M13_Alfred Burian	8	C16:1w13	1146.8	0.937	-34.459	A		Cori 1.1	algae	green	M	-23.74690595		Coricystis	minor	140218
51_M13_Alfred Burian	9	C16:1w9/7	1171.2	9.231	-35.301	T	1	Cori 1.1	algae	green	M	-23.74690595		Coricystis	minor	140218
51_M13_Alfred Burian	10	C17:0	1253.8	2.959	-36.881	A		Cori 1.1	algae	green	M	-23.74690595		Coricystis	minor	140218
51_M13_Alfred Burian	11	C16:2w6	1278.9	1.461	-34.63	A		Cori 1.1	algae	green	M	-23.74690595		Coricystis	minor	140218
51_M13_Alfred Burian	12	C16:4w3	1444.6	4.358	-34.92	B		Cori 1.1	algae	green	M	-23.74690595		Coricystis	minor	140218
51_M13_Alfred Burian	13	C18:1w9c	1513.6	19.676	-35.383	B		Cori 1.1	algae	green	M	-23.74690595		Coricystis	minor	140218
51_M13_Alfred Burian	14	C19:0	1632.3	7.553	-35.336	A		Cori 1.1	algae	green	M	-23.74690595		Coricystis	minor	140218
51_M13_Alfred Burian	15	C18:2w6c	1656.3	6.144	-31.629	A		Cori 1.1	algae	green	M	-23.74690595		Coricystis	minor	140218
51_M13_Alfred Burian	16	C18:3w6	1752	1.838	-42.689	A		Cori 1.1	algae	green	M	-23.74690595		Coricystis	minor	140218
51_M13_Alfred Burian	17	C18:3w3	1831.9	38.477	-36.813	A		Cori 1.1	algae	green	M	-23.74690595		Coricystis	minor	140218
51_M13_Alfred Burian	18	C18:4w3	1924.7	7.887	-41.055	A		Cori 1.1	algae	green	M	-23.74690595		Coricystis	minor	140218
51_M13_Alfred Burian	19	C21:0	1991.4	6.74	-34.335	A		Cori 1.1	algae	green	M	-23.74690595		Coricystis	minor	140218
52_M14_Alfred Burian	6	C16:0	1083.5	34.487	-35.012	B		Cori 2.1	algae	green	M	-23.74690595		Coricystis	minor	140218	Scenedsmus
52_M14_Alfred Burian	7	C16:1w13	1148.2	1.423	-36.082	A		Cori 2.1	algae	green	M	-23.74690595		Coricystis	minor	140218	Scenedsmus
52_M14_Alfred Burian	8	C16:1w9/7	1173.7	13.995	-35.929	T	1	Cori 2.1	algae	green	M	-23.74690595		Coricystis	minor	140218	Scenedsmus
52_M14_Alfred Burian	9	C17:0	1255.7	3.756	-38.73	B		Cori 2.1	algae	green	M	-23.74690595		Coricystis	minor	140218	Scenedsmus
52_M14_Alfred Burian	10	C16:2w6	1280.3	3.126	-37.601	A		Cori 2.1	algae	green	M	-23.74690595		Coricystis	minor	140218	Scenedsmus
52_M14_Alfred Burian	11	C16:4w3	1446.3	7.742	-36.933	A		Cori 2.1	algae	green	M	-23.74690595		Coricystis	minor	140218	Scenedsmus
52_M14_Alfred Burian	12	C18:1w9c	1516.1	33.064	-36.723	E		Cori 2.1	algae	green	M	-23.74690595		Coricystis	minor	140218	Scenedsmus
52_M14_Alfred Burian	13	C18:1w7c	1533.2	2.404	-13.657	E		Cori 2.1	algae	green	M	-23.74690595		Coricystis	minor	140218	Scenedsmus
52_M14_Alfred Burian	13	C18:1w7c/9	1533.2	35.468	-35.2	T	E	Cori 2.1	algae	green	M	-23.74690595		Coricystis	minor	140218	Scenedsmus
52_M14_Alfred Burian	14	C19:0	1636.3	7.247	-35.139	A		Cori 2.1	algae	green	M	-23.74690595		Coricystis	minor	140218	Scenedsmus
52_M14_Alfred Burian	15	C18:2w6c	1659	9.82	-36.3	B		Cori 2.1	algae	green	M	-23.74690595		Coricystis	minor	140218	Scenedsmus
52_M14_Alfred Burian	16	C18:3w6	1753.7	3.005	-40.616	A		Cori 2.1	algae	green	M	-23.74690595		Coricystis	minor	140218	Scenedsmus
52_M14_Alfred Burian	17	C18:3w3	1837.3	66.946	-37.103	A		Cori 2.1	algae	green	M	-23.74690595		Coricystis	minor	140218	Scenedsmus
52_M14_Alfred Burian	18	C18:4w3	1927.2	12.03	-41.688	A		Cori 2.1	algae	green	M	-23.74690595		Coricystis	minor	140218	Scenedsmus
52_M14_Alfred Burian	19	C21:0	1996.8	15.035	-33.674	A		Cori 2.1	algae	green	M	-23.74690595		Coricystis	minor	140218	Scenedsmus
52_M14_Alfred Burian	20	C23:0	2265.4	1.913	-37.171	A		Cori 2.1	algae	green	M	-23.74690595		Coricystis	minor	140218	Scenedsmus
54_M41A_Alfred Burian	5	C16:0	1073.6	2.416	-30.418	A		C eme 1.1	algae	green	M	-16.49892888		Chlorella	emersonii	140218	Haematococcus	pluvialis
54_M41A_Alfred Burian		C16:1w9/7	1167	1	-26.361	T	1	C eme 1.1	algae	green	M	-16.49892888		Chlorella	emersonii	140218	Haematococcus	pluvialis
54_M41A_Alfred Burian	6	C17:0	1253	3.148	-36.733	A		C eme 1.1	algae	green	M	-16.49892888		Chlorella	emersonii	140218	Haematococcus	pluvialis
54_M41A_Alfred Burian	7	C18:1w9c	1512.1	5.226	-26.711	A		C eme 1.1	algae	green	M	-16.49892888		Chlorella	emersonii	140218	Haematococcus	pluvialis
54_M41A_Alfred Burian	8	C19:0	1631.7	13.16	-35.398	A		C eme 1.1	algae	green	M	-16.49892888		Chlorella	emersonii	140218	Haematococcus	pluvialis
54_M41A_Alfred Burian		C18:2w6c	1659	0.6	-30.4	A		C eme 1.1	algae	green	M	-16.49892888		Chlorella	emersonii	140218	Haematococcus	pluvialis
54_M41A_Alfred Burian	9	C18:3w3	1822.7	2.437	-33.016	A		C eme 1.1	algae	green	M	-16.49892888		Chlorella	emersonii	140218	Haematococcus	pluvialis
54_M41A_Alfred Burian	10	C18:4w3	1922.2	1.548	-36.025	A		C eme 1.1	algae	green	M	-16.49892888		Chlorella	emersonii	140218	Haematococcus	pluvialis
54_M41A_Alfred Burian	11	C21:0	1994.7	12.325	-33.362	A		C eme 1.1	algae	green	M	-16.49892888		Chlorella	emersonii	140218	Haematococcus	pluvialis
54_M41A_Alfred Burian	12	C23:0	2263.9	1.195	-33.385	A		C eme 1.1	algae	green	M	-16.49892888		Chlorella	emersonii	140218	Haematococcus	pluvialis
55_T19_Alfred Burian	7	C16:0	1077.2	12.501	-33.152	B		Synechocyst 1.1	algae	cyano	T	-22.07272387		Synechocystis		140218
55_T19_Alfred Burian	8	C16:1w9/7	1162.5	1.379	-34.052	T	1	Synechocyst 1.1	algae	cyano	T	-22.07272387		Synechocystis		140218
55_T19_Alfred Burian		C18:1w7c	1528	0.466	-36.6	A		Synechocyst 1.1	algae	cyano	T	-22.07272387		Synechocystis		140218
55_T19_Alfred Burian		C19:0	1622	0.8	-40.7	A		Synechocyst 1.1	algae	cyano	T	-22.07272387		Synechocystis		140218
55_T19_Alfred Burian	9	C18:2w6c	1653	1.463	-36.131	A		Synechocyst 1.1	algae	cyano	T	-22.07272387		Synechocystis		140218
55_T19_Alfred Burian	10	C18:3w6	1752.3	5.273	-35.554	A		Synechocyst 1.1	algae	cyano	T	-22.07272387		Synechocystis		140218
55_T19_Alfred Burian	11	C18:3w3	1821.6	2.017	-38.252	A		Synechocyst 1.1	algae	cyano	T	-22.07272387		Synechocystis		140218
55_T19_Alfred Burian	12	C18:4w3	1921.3	1.468	-39.401	A		Synechocyst 1.1	algae	cyano	T	-22.07272387		Synechocystis		140218
55_T19_Alfred Burian	13	C21:0	1986.1	1.183	-35.796	A		Synechocyst 1.1	algae	cyano	T	-22.07272387		Synechocystis		140218
56_T44_Alfred Burian	5	C14:0	759.3	1.564	-28.571	A		Scen 2.1	algae	green	T	-20.1967998		Scenedesmus		140218	Gephyrocapsa
56_T44_Alfred Burian	8	C16:0	1077.6	11.865	-29.24	B		Scen 2.1	algae	green	T	-20.1967998		Scenedesmus		140218	Gephyrocapsa
56_T44_Alfred Burian	9	C16:1w9/7	1168.1	1.44	-31.957	T	1	Scen 2.1	algae	green	T	-20.1967998		Scenedesmus		140218	Gephyrocapsa
56_T44_Alfred Burian	10	C16:4w3	1437.9	1.332	-34.905	A		Scen 2.1	algae	green	T	-20.1967998		Scenedesmus		140218	Gephyrocapsa
56_T44_Alfred Burian	11	C18:1w9c	1515.7	6.002	-32.746	E		Scen 2.1	algae	green	T	-20.1967998		Scenedesmus		140218	Gephyrocapsa
56_T44_Alfred Burian	12	C18:1w7c	1530.3	1.175	-26.139	E		Scen 2.1	algae	green	T	-20.1967998		Scenedesmus		140218	Gephyrocapsa
56_T44_Alfred Burian		C18:1w7c/9		2.35	-31.6	T	E	Scen 2.1	algae	green	T	-20.1967998		Scenedesmus		140218	Gephyrocapsa
56_T44_Alfred Burian	13	C19:0	1624.3	1.977	-38.617	A		Scen 2.1	algae	green	T	-20.1967998		Scenedesmus		140218	Gephyrocapsa
56_T44_Alfred Burian		C18:2w6c	1653	0.78	-33.4	A		Scen 2.1	algae	green	T	-20.1967998		Scenedesmus		140218	Gephyrocapsa
56_T44_Alfred Burian	14	C18:3w3	1822.7	3.228	-34.454	A		Scen 2.1	algae	green	T	-20.1967998		Scenedesmus		140218	Gephyrocapsa
56_T44_Alfred Burian	15	C21:0	1988.2	2.685	-34.108	A		Scen 2.1	algae	green	T	-20.1967998		Scenedesmus		140218	Gephyrocapsa
56_T44_Alfred Burian		C20:3w3+C20:4w6+C22:0	2134	0.22	-38.1	A		Scen 2.1	algae	green	T	-20.1967998		Scenedesmus		140218	Gephyrocapsa
57_T18_Alfred Burian	5	C14:0	750.9	1.265	-40.081	C		Synechococc 2.1	algae	cyano	T	-29.42027135		Synechococcus		140218
57_T18_Alfred Burian	6	C14:1	847.5	2.657	-40.482	C		Synechococc 2.1	algae	cyano	T	-29.42027135		Synechococcus		140218
57_T18_Alfred Burian	8	C16:0	1077.2	11.259	-40.725	C		Synechococc 2.1	algae	cyano	T	-29.42027135		Synechococcus		140218
57_T18_Alfred Burian	9	C16:1w9/7	1165	7.653	-43.469	T	1	Synechococc 2.1	algae	cyano	T	-29.42027135		Synechococcus		140218
57_T18_Alfred Burian		C18:0	1435	0.22	-40.825	C		Synechococc 2.1	algae	cyano	T	-29.42027135		Synechococcus		140218
57_T18_Alfred Burian	10	C18:1w7c	1529.9	1.845	-40.396	C		Synechococc 2.1	algae	cyano	T	-29.42027135		Synechococcus		140218
57_T18_Alfred Burian	11	C19:0	1622.9	1.018	-38.702	C		Synechococc 2.1	algae	cyano	T	-29.42027135		Synechococcus		140218
57_T18_Alfred Burian	12	C21:0	1986.8	1.519	-35.203	C		Synechococc 2.1	algae	cyano	T	-29.42027135		Synechococcus		140218
58_T09_Alfred Burian	6	C16:0	1078.6	15.54	-26.344	B		Chlor eme 3.1	algae	green	T	-16.48		Chlorella	emersonii	140218
58_T09_Alfred Burian	7	C16:1w9/7	1168.9	2.573	-30.625	T	1	Chlor eme 3.1	algae	green	T	-16.48		Chlorella	emersonii	140218
58_T09_Alfred Burian	8	C16:4w3	1441.3	5.583	-25.925	A		Chlor eme 3.1	algae	green	T	-16.48		Chlorella	emersonii	140218
58_T09_Alfred Burian	9	C18:1w9c	1514	16.629	-29.634	B		Chlor eme 3.1	algae	green	T	-16.48		Chlorella	emersonii	140218
58_T09_Alfred Burian		C19:0		0.7		D		Chlor eme 3.1	algae	green	T	-16.48		Chlorella	emersonii	140218
58_T09_Alfred Burian	10	C18:2w6c	1655.1	3.261	-30.986	A		Chlor eme 3.1	algae	green	T	-16.48		Chlorella	emersonii	140218
58_T09_Alfred Burian	11	C18:3w3	1830.2	28.378	-29.272	A		Chlor eme 3.1	algae	green	T	-16.48		Chlorella	emersonii	140218
58_T09_Alfred Burian	12	C18:4w3	1923	2.366	-34.66	A		Chlor eme 3.1	algae	green	T	-16.48		Chlorella	emersonii	140218
58_T09_Alfred Burian	13	C21:0	1987.8	2.148	-35.711	A		Chlor eme 3.1	algae	green	T	-16.48		Chlorella	emersonii	140218
59_T21_Alfred Burian	8	C16:0	1079.7	17.614	-31.215	B		Leptolyng 1.1	algae	cyano	T	-18.93673237		Leptolyngbia		140218
59_T21_Alfred Burian	9	C16:1w9/7	1167.3	12.98	-35.976	T	1	Leptolyng 1.1	algae	cyano	T	-18.93673237		Leptolyngbia		140218
59_T21_Alfred Burian		C18:0	1438	0.9	-38.8	A		Leptolyng 1.1	algae	cyano	T	-18.93673237		Leptolyngbia		140218
59_T21_Alfred Burian	10	C18:1w9c	1514.4	1.102	-35.436	E		Leptolyng 1.1	algae	cyano	T	-18.93673237		Leptolyngbia		140218
59_T21_Alfred Burian	11	C18:1w7c	1531.3	2.182	-28.364	E		Leptolyng 1.1	algae	cyano	T	-18.93673237		Leptolyngbia		140218
59_T21_Alfred Burian		C18:1w7c/9		3.284	-30.7	T	E	Leptolyng 1.1	algae	cyano	T	-18.93673237		Leptolyngbia		140218
59_T21_Alfred Burian	12	C19:0	1625.4	1.118	-39.186	A		Leptolyng 1.1	algae	cyano	T	-18.93673237		Leptolyngbia		140218
59_T21_Alfred Burian	13	C18:2w6c	1657	8.11	-34.42	A		Leptolyng 1.1	algae	cyano	T	-18.93673237		Leptolyngbia		140218
59_T21_Alfred Burian	14	C18:3w3	1828.3	18.096	-37.801	A		Leptolyng 1.1	algae	cyano	T	-18.93673237		Leptolyngbia		140218
59_T21_Alfred Burian	15	C21:0	1987.4	1.605	-37.579	A		Leptolyng 1.1	algae	cyano	T	-18.93673237		Leptolyngbia		140218
60_T29_Alfred Burian	6	C16:0	1085.3	47.895	-31.66	C		Chlamy 1.1	algae	green	T	-20.35215191		Chlamydomonas	reinhardtii	140218
60_T29_Alfred Burian	7	C16:1w13	1148.9	1.174	-34.45	A		Chlamy 1.1	algae	green	T	-20.35215191		Chlamydomonas	reinhardtii	140218
60_T29_Alfred Burian	8	C16:1w9/7	1171	3.208	-33.071	T	1	Chlamy 1.1	algae	green	T	-20.35215191		Chlamydomonas	reinhardtii	140218
60_T29_Alfred Burian	9	C16:2w6	1280.1	1.667	-34.29	A		Chlamy 1.1	algae	green	T	-20.35215191		Chlamydomonas	reinhardtii	140218
60_T29_Alfred Burian	10	C16:4w3	1445.9	8.108	-33.698	A		Chlamy 1.1	algae	green	T	-20.35215191		Chlamydomonas	reinhardtii	140218
60_T29_Alfred Burian	11	C18:1w9c	1516.9	23.133	-34.862	E		Chlamy 1.1	algae	green	T	-20.35215191		Chlamydomonas	reinhardtii	140218
60_T29_Alfred Burian	12	C18:1w7c	1537	11.212	-30.49	E		Chlamy 1.1	algae	green	T	-20.35215191		Chlamydomonas	reinhardtii	140218
60_T29_Alfred Burian	12	C18:1w7c/9	1537	34.345	-33.5	T	E	Chlamy 1.1	algae	green	T	-20.35215191		Chlamydomonas	reinhardtii	140218
60_T29_Alfred Burian		C19:0		0.6		D		Chlamy 1.1	algae	green	T	-20.35215191		Chlamydomonas	reinhardtii	140218
60_T29_Alfred Burian	13	C18:2w6c	1660.3	10.897	-35.077	A		Chlamy 1.1	algae	green	T	-20.35215191		Chlamydomonas	reinhardtii	140218
60_T29_Alfred Burian	14	C18:2w4	1720.1	8.854	-36.29	A		Chlamy 1.1	algae	green	T	-20.35215191		Chlamydomonas	reinhardtii	140218
60_T29_Alfred Burian	15	C18:3w3	1834.8	41.527	-34.455	A		Chlamy 1.1	algae	green	T	-20.35215191		Chlamydomonas	reinhardtii	140218
60_T29_Alfred Burian	16	C20:1w9	1891.2	3.249	-34.78	A		Chlamy 1.1	algae	green	T	-20.35215191		Chlamydomonas	reinhardtii	140218
61_T43_Alfred Burian	6	C16:0	1076.3	9.944	-24.407	B		C vulg 3.1	algae	green	T	-16.58084731		Chlorella	vulgaris	140218
61_T43_Alfred Burian	7	C16:1w9/7	1168.3	2.061	-26.938	T	1	C vulg 3.1	algae	green	T	-16.58084731		Chlorella	vulgaris	140218
61_T43_Alfred Burian		C16:2w6	1278	0.44	-33.09	A		C vulg 3.1	algae	green	T	-16.58084731		Chlorella	vulgaris	140218
61_T43_Alfred Burian	8	C18:0	1439.6	3.931	-16.593	E		C vulg 3.1	algae	green	T	-16.58084731		Chlorella	vulgaris	140218
61_T43_Alfred Burian	9	C16:4w3	1444.8	3.913	-21.845	E		C vulg 3.1	algae	green	T	-16.58084731		Chlorella	vulgaris	140218
61_T43_Alfred Burian	10	C16:4w3/C18:0	1514.2	7.844	-30.526	T	E	C vulg 3.1	algae	green	T	-16.58084731		Chlorella	vulgaris	140218
61_T43_Alfred Burian	10	C18:1w9c	1514.2	1.325	-30.526	A		C vulg 3.1	algae	green	T	-16.58084731		Chlorella	vulgaris	140218
61_T43_Alfred Burian	11	C19:0	1624.3	1.53	-39.221	A		C vulg 3.1	algae	green	T	-16.58084731		Chlorella	vulgaris	140218
61_T43_Alfred Burian	12	C18:2w6c	1653.8	1.178	-31.672	A		C vulg 3.1	algae	green	T	-16.58084731		Chlorella	vulgaris	140218
61_T43_Alfred Burian	13	C18:3w3	1824.4	5.513	-31.322	A		C vulg 3.1	algae	green	T	-16.58084731		Chlorella	vulgaris	140218
61_T43_Alfred Burian	14	C21:0	1988.2	2.236	-35.33	A		C vulg 3.1	algae	green	T	-16.58084731		Chlorella	vulgaris	140218
62_T47_Alfred Burian	5	C14:0	753.7	12.508	-29.036	A		E. Hux naked 2.1	algae	hapto	T	-18.06304312		Emiliana	huxleyi naked	140218	Chlorella	vulgaris
62_T47_Alfred Burian	8	C16:0	1074.7	3.95	-28.321	B		E. Hux naked 2.1	algae	hapto	T	-18.06304312		Emiliana	huxleyi naked	140218	Chlorella	vulgaris
62_T47_Alfred Burian		C16:1w9/7	1162	0.4	-32.6	T	1	E. Hux naked 2.1	algae	hapto	T	-18.06304312		Emiliana	huxleyi naked	140218	Chlorella	vulgaris
62_T47_Alfred Burian	9	C18:1w9c	1516.9	4.847	-32.39	E		E. Hux naked 2.1	algae	hapto	T	-18.06304312		Emiliana	huxleyi naked	140218	Chlorella	vulgaris
62_T47_Alfred Burian	10	C18:1w7c	1532	2.435	-26.069	E		E. Hux naked 2.1	algae	hapto	T	-18.06304312		Emiliana	huxleyi naked	140218	Chlorella	vulgaris
62_T47_Alfred Burian		C18:1w7c/9		7.282	-30.36	T	E	E. Hux naked 2.1	algae	hapto	T	-18.06304312		Emiliana	huxleyi naked	140218	Chlorella	vulgaris
62_T47_Alfred Burian	11	C19:0	1625.2	1.13	-39.376	A		E. Hux naked 2.1	algae	hapto	T	-18.06304312		Emiliana	huxleyi naked	140218	Chlorella	vulgaris
62_T47_Alfred Burian	12	C18:2w6c	1654.2	1.068	-31.947	A		E. Hux naked 2.1	algae	hapto	T	-18.06304312		Emiliana	huxleyi naked	140218	Chlorella	vulgaris
62_T47_Alfred Burian	13	C18:3w3	1823.3	2.444	-34.132	A		E. Hux naked 2.1	algae	hapto	T	-18.06304312		Emiliana	huxleyi naked	140218	Chlorella	vulgaris
62_T47_Alfred Burian	14	C18:4w3	1925.3	8.309	-35.309	A		E. Hux naked 2.1	algae	hapto	T	-18.06304312		Emiliana	huxleyi naked	140218	Chlorella	vulgaris
62_T47_Alfred Burian	15	C21:0	1988.2	1.448	-34.932	A		E. Hux naked 2.1	algae	hapto	T	-18.06304312		Emiliana	huxleyi naked	140218	Chlorella	vulgaris
62_T47_Alfred Burian	16	C18:5w3	2038.6	10.431	-34.706	A		E. Hux naked 2.1	algae	hapto	T	-18.06304312		Emiliana	huxleyi naked	140218	Chlorella	vulgaris
62_T47_Alfred Burian		C20:5w3	2503	0.37	-33.5	B		E. Hux naked 2.1	algae	hapto	T	-18.06304312		Emiliana	huxleyi naked	140218	Chlorella	vulgaris
62_T47_Alfred Burian	17	C22:6w3	2549	13.745	-31.838	A		E. Hux naked 2.1	algae	hapto	T	-18.06304312		Emiliana	huxleyi naked	140218	Chlorella	vulgaris
63_T23_Alfred Burian	6	C14:0	751.6	3.115	-38.633	A		Phaeod 1.1	algae	diatom	T	-26.33934676		Phaeodactylum	tricornutum	140218	Leptolyngbia
63_T23_Alfred Burian	8	C16:0	1075.7	6.135	-36.922	B		Phaeod 1.1	algae	diatom	T	-26.33934676		Phaeodactylum	tricornutum	140218	Leptolyngbia
63_T23_Alfred Burian	9	C16:1w9/7	1165.8	9.292	-41.113	T	1	Phaeod 1.1	algae	diatom	T	-26.33934676		Phaeodactylum	tricornutum	140218	Leptolyngbia
63_T23_Alfred Burian	10	C16:2w4	1321.3	1.276	-46.174	A		Phaeod 1.1	algae	diatom	T	-26.33934676		Phaeodactylum	tricornutum	140218	Leptolyngbia
63_T23_Alfred Burian	11	C16:3w3	1425.2	4.265	-45.685	E		Phaeod 1.1	algae	diatom	T	-26.33934676		Phaeodactylum	tricornutum	140218	Leptolyngbia
63_T23_Alfred Burian	12	C18:0	1436.5	1.322	-37.403	E		Phaeod 1.1	algae	diatom	T	-26.33934676		Phaeodactylum	tricornutum	140218	Leptolyngbia
63_T23_Alfred Burian		C16:3w3/C18		5.587	-43.59	T	E	Phaeod 1.1	algae	diatom	T	-26.33934676		Phaeodactylum	tricornutum	140218	Leptolyngbia
63_T23_Alfred Burian		C18:1w9c	1513	0.49	-40.23	A		Phaeod 1.1	algae	diatom	T	-26.33934676		Phaeodactylum	tricornutum	140218	Leptolyngbia
63_T23_Alfred Burian	13	C19:0	1624.1	1.293	-40.876	A		Phaeod 1.1	algae	diatom	T	-26.33934676		Phaeodactylum	tricornutum	140218	Leptolyngbia
63_T23_Alfred Burian		C18:2w6c	1653	0.66	-45.78	A		Phaeod 1.1	algae	diatom	T	-26.33934676		Phaeodactylum	tricornutum	140218	Leptolyngbia
63_T23_Alfred Burian	14	C21:0	1989.3	1.621	-37.608	A		Phaeod 1.1	algae	diatom	T	-26.33934676		Phaeodactylum	tricornutum	140218	Leptolyngbia
63_T23_Alfred Burian	15	C20:3w3+C20:4w6+C22:0	2142.7	1.626	-45.109	A		Phaeod 1.1	algae	diatom	T	-26.33934676		Phaeodactylum	tricornutum	140218	Leptolyngbia
63_T23_Alfred Burian	16	C20:5w3	2270.8	12.659	-45.426	A		Phaeod 1.1	algae	diatom	T	-26.33934676		Phaeodactylum	tricornutum	140218	Leptolyngbia
63_T23_Alfred Burian	17	C24:1w9	2429.4	2.291	-37.915	A		Phaeod 1.1	algae	diatom	T	-26.33934676		Phaeodactylum	tricornutum	140218	Leptolyngbia
64_T18_Alfred Burian	7	C16:0	1080.7	21.064	-25.262	B		Seleneastrum old	algae	green	T	-15.55		Selenastrum		140218
64_T18_Alfred Burian	8	C16:1w9/7	1169.4	1.648	-27.267	T	1	Seleneastrum old	algae	green	T	-15.55		Selenastrum		140218
64_T18_Alfred Burian	9	C16:4w3	1443.8	3.742	-26.08	A		Seleneastrum old	algae	green	T	-15.55		Selenastrum		140218
64_T18_Alfred Burian	10	C18:1w9c	1515.5	16.499	-25	E		Seleneastrum old	algae	green	T	-15.55		Selenastrum		140218
64_T18_Alfred Burian	11	C18:1w7c	1522.6	1.004	-22	E		Seleneastrum old	algae	green	T	-15.55		Selenastrum		140218
64_T18_Alfred Burian		C18:1w7c/9		17.503	-25.159	T	E	Seleneastrum old	algae	green	T	-15.55		Selenastrum		140218
64_T18_Alfred Burian	12	C18:2w6c	1658.2	14.377	-34.451	F		Seleneastrum old	algae	green	T	-15.55		Selenastrum		140218
64_T18_Alfred Burian	14	C18:3w3	1830.8	22.503	-27.991	A		Seleneastrum old	algae	green	T	-15.55		Selenastrum		140218
64_T18_Alfred Burian	15	C18:4w3	1924.9	5.343	-30.931	A		Seleneastrum old	algae	green	T	-15.55		Selenastrum		140218
64_T18_Alfred Burian		C22:0	2136	0.7	-32.8	A		Seleneastrum old	algae	green	T	-15.55		Selenastrum		140218
64_T18_Alfred Burian		C24:0	2379	0.7	-32.7	A		Seleneastrum old	algae	green	T	-15.55		Selenastrum		140218
65_T28_Alfred Burian	5	C14:0	751.6	2.049	-34.971	A		Nodularia 2.1.2	algae	cyano	T	-26.20996838		Nodularia	spumigena	140218
65_T28_Alfred Burian	7	C16:0	1078	11.525	-36.592	B		Nodularia 2.1.2	algae	cyano	T	-26.20996838		Nodularia	spumigena	140218
65_T28_Alfred Burian	8	C16:1w9/7	1164.8	3.565	-39.198	T	1	Nodularia 2.1.2	algae	cyano	T	-26.20996838		Nodularia	spumigena	140218
65_T28_Alfred Burian		C18:1w9c	1513	0.4	-43.9	B		Nodularia 2.1.2	algae	cyano	T	-26.20996838		Nodularia	spumigena	140218
65_T28_Alfred Burian		C18:1w7c	1526	0.4	-37.06	B		Nodularia 2.1.2	algae	cyano	T	-26.20996838		Nodularia	spumigena	140218
65_T28_Alfred Burian	9	C19:0	1625	1.469	-39.023	A		Nodularia 2.1.2	algae	cyano	T	-26.20996838		Nodularia	spumigena	140218
65_T28_Alfred Burian		C18:2w6c	1653	0.4	-46.8	B		Nodularia 2.1.2	algae	cyano	T	-26.20996838		Nodularia	spumigena	140218
65_T28_Alfred Burian	10	C18:3w3	1822.9	1.569	-43.521	A		Nodularia 2.1.2	algae	cyano	T	-26.20996838		Nodularia	spumigena	140218
65_T28_Alfred Burian	11	C18:4w3	1923.4	3.424	-44.071	A		Nodularia 2.1.2	algae	cyano	T	-26.20996838		Nodularia	spumigena	140218
65_T28_Alfred Burian	12	C21:0	1988.4	1.86	-36.198	A		Nodularia 2.1.2	algae	cyano	T	-26.20996838		Nodularia	spumigena	140218
69_T46_Alfred Burian	5	C14:0	753.2	11.768	-28.247	A		E. Hux naked 1.1	algae	hapto	T	-18.06304312		Emiliana	huxleyi naked	140219
69_T46_Alfred Burian	9	C16:0	1074.3	3.519	-28.052	B		E. Hux naked 1.1	algae	hapto	T	-18.06304312		Emiliana	huxleyi naked	140219
69_T46_Alfred Burian		C16:1w9/7	1162	0.38	-30.7	T	1	E. Hux naked 1.1	algae	hapto	T	-18.06304312		Emiliana	huxleyi naked	140219
69_T46_Alfred Burian		C17:0	1242	0.36	-31.2	B		E. Hux naked 1.1	algae	hapto	T	-18.06304312		Emiliana	huxleyi naked	140219
69_T46_Alfred Burian		C16:4w3	1437	0.4	-36.02	B		E. Hux naked 1.1	algae	hapto	T	-18.06304312		Emiliana	huxleyi naked	140219
69_T46_Alfred Burian	10	C18:1w9c	1516.3	6.111	-28.243	E		E. Hux naked 1.1	algae	hapto	T	-18.06304312		Emiliana	huxleyi naked	140219
69_T46_Alfred Burian	11	C18:1w7c	1531.1	2.372	-27.195	E		E. Hux naked 1.1	algae	hapto	T	-18.06304312		Emiliana	huxleyi naked	140219
69_T46_Alfred Burian		C18:1w7c/9		8.483	-27.9	T	E	E. Hux naked 1.1	algae	hapto	T	-18.06304312		Emiliana	huxleyi naked	140219
69_T46_Alfred Burian	12	C19:0	1624.8	1.416	-34.628	A		E. Hux naked 1.1	algae	hapto	T	-18.06304312		Emiliana	huxleyi naked	140219
69_T46_Alfred Burian	13	C18:2w6c	1653.6	1.441	-29.242	A		E. Hux naked 1.1	algae	hapto	T	-18.06304312		Emiliana	huxleyi naked	140219
69_T46_Alfred Burian		C18:3w6	1750	0.38	-31.8	B		E. Hux naked 1.1	algae	hapto	T	-18.06304312		Emiliana	huxleyi naked	140219
69_T46_Alfred Burian	14	C18:3w3	1822.7	3.083	-30.13	A		E. Hux naked 1.1	algae	hapto	T	-18.06304312		Emiliana	huxleyi naked	140219
69_T46_Alfred Burian	15	C18:4w3	1924.3	10.376	-30.609	A		E. Hux naked 1.1	algae	hapto	T	-18.06304312		Emiliana	huxleyi naked	140219
69_T46_Alfred Burian	16	C21:0	1988	1.765	-33.966	A		E. Hux naked 1.1	algae	hapto	T	-18.06304312		Emiliana	huxleyi naked	140219
69_T46_Alfred Burian	17	C18:5w3	2037.5	12.164	-31.757	A		E. Hux naked 1.1	algae	hapto	T	-18.06304312		Emiliana	huxleyi naked	140219
69_T46_Alfred Burian		C20:5w3	2503	0.56	-25.01	F		E. Hux naked 1.1	algae	hapto	T	-18.06304312		Emiliana	huxleyi naked	140219
69_T46_Alfred Burian	18	C22:6w3	2547.5	17.186	-27.862	A		E. Hux naked 1.1	algae	hapto	T	-18.06304312		Emiliana	huxleyi naked	140219
70_T52_Alfred Burian	5	C14:0	752.6	6.016	-22.404	A		Navi 1.1	algae	diatom	T	-14.62348355		Navicula	pelliculosa	140219
70_T52_Alfred Burian	7	C16:0	1094.7	64.16	-24.399	C		Navi 1.1	algae	diatom	T	-14.62348355		Navicula	pelliculosa	140219
70_T52_Alfred Burian		C16:1w13	1137	0.989	-27.1	B		Navi 1.1	algae	diatom	T	-14.62348355		Navicula	pelliculosa	140219
70_T52_Alfred Burian	8	C16:1w9/7	1186.5	144.275	-23.118	T	1	Navi 1.1	algae	diatom	T	-14.62348355		Navicula	pelliculosa	140219
70_T52_Alfred Burian	9	C16:2w7	1272.8	3.455	-29.81	A		Navi 1.1	algae	diatom	T	-14.62348355		Navicula	pelliculosa	140219
70_T52_Alfred Burian	10	C16:2w4	1325.5	3.159	-31.853	A		Navi 1.1	algae	diatom	T	-14.62348355		Navicula	pelliculosa	140219
70_T52_Alfred Burian	11	C16:3w3	1427.5	4.832	-32.347	E		Navi 1.1	algae	diatom	T	-14.62348355		Navicula	pelliculosa	140219
70_T52_Alfred Burian	12	C16:4w3	1439.2	1.465	-25.466	E		Navi 1.1	algae	diatom	T	-14.62348355		Navicula	pelliculosa	140219
70_T52_Alfred Burian		C16:4w3/C16:3w3		6.297	-30.9	T	E	Navi 1.1	algae	diatom	T	-14.62348355		Navicula	pelliculosa	140219
70_T52_Alfred Burian	13	C18:1w9c	1516.1	1.86	-31.366	E		Navi 1.1	algae	diatom	T	-14.62348355		Navicula	pelliculosa	140219
70_T52_Alfred Burian	14	C18:1w7c	1532	1.733	-18.33	E		Navi 1.1	algae	diatom	T	-14.62348355		Navicula	pelliculosa	140219
70_T52_Alfred Burian		C18:1w7c/9		3.593	-25.1	T	E	Navi 1.1	algae	diatom	T	-14.62348355		Navicula	pelliculosa	140219
70_T52_Alfred Burian	15	C18:1w5	1570.8	1.408	-38.954	A		Navi 1.1	algae	diatom	T	-14.62348355		Navicula	pelliculosa	140219
70_T52_Alfred Burian	16	C20:3w3+C20:4w6+C22:0	2143.3	2.085	-37.376	A		Navi 1.1	algae	diatom	T	-14.62348355		Navicula	pelliculosa	140219
70_T52_Alfred Burian	17	C20:5w3	2274.1	38.87	-26.715	A		Navi 1.1	algae	diatom	T	-14.62348355		Navicula	pelliculosa	140219
71_T27_Alfred Burian	5	C14:0	751.6	2.482	-34.964	A		Nodularia 1.1	algae	cyano	T	-26.20996838		Nodularia	spumigena	140219
71_T27_Alfred Burian	7	C16:0	1078.9	14.552	-36.153	B		Nodularia 1.1	algae	cyano	T	-26.20996838		Nodularia	spumigena	140219
71_T27_Alfred Burian	8	C16:1w9/7	1165	5.688	-35.733	T	1	Nodularia 1.1	algae	cyano	T	-26.20996838		Nodularia	spumigena	140219
71_T27_Alfred Burian		C18:0	1437	0.7	-31.65	A		Nodularia 1.1	algae	cyano	T	-26.20996838		Nodularia	spumigena	140219
71_T27_Alfred Burian		C18:1w9c	1513	0.8	-38.7	A		Nodularia 1.1	algae	cyano	T	-26.20996838		Nodularia	spumigena	140219
71_T27_Alfred Burian		C18:1w7c	1530	0.7	-33.5	A		Nodularia 1.1	algae	cyano	T	-26.20996838		Nodularia	spumigena	140219
71_T27_Alfred Burian	9	C19:0	1625.2	1.869	-33.967	A		Nodularia 1.1	algae	cyano	T	-26.20996838		Nodularia	spumigena	140219
71_T27_Alfred Burian		C18:2w6c	1653	0.6	-40.6	A		Nodularia 1.1	algae	cyano	T	-26.20996838		Nodularia	spumigena	140219
71_T27_Alfred Burian		C18:3w6	1751	0.3	-38.1	B		Nodularia 1.1	algae	cyano	T	-26.20996838		Nodularia	spumigena	140219
71_T27_Alfred Burian	10	C18:3w3	1822.9	3.053	-38.704	A		Nodularia 1.1	algae	cyano	T	-26.20996838		Nodularia	spumigena	140219
71_T27_Alfred Burian	11	C18:4w3	1923	4.687	-38.422	A		Nodularia 1.1	algae	cyano	T	-26.20996838		Nodularia	spumigena	140219
71_T27_Alfred Burian	12	C21:0	1988.8	2.657	-31.29	A		Nodularia 1.1	algae	cyano	T	-26.20996838		Nodularia	spumigena	140219
72_T45_Alfred Burian	5	C14:0	754.1	15.635	-27.772	A		Gcapsa 2.1	algae	hapto	T	-11.3776097		Gephyrocapsa	oceanica	140219
72_T45_Alfred Burian	8	C16:0	1076.3	7.947	-28.488	B		Gcapsa 2.1	algae	hapto	T	-11.3776097		Gephyrocapsa	oceanica	140219
72_T45_Alfred Burian	9	C16:1w9/7	1162.9	1.15	-29.124	T	1	Gcapsa 2.1	algae	hapto	T	-11.3776097		Gephyrocapsa	oceanica	140219
72_T45_Alfred Burian	10	C18:0	1440.8	3.274	-30.649	A		Gcapsa 2.1	algae	hapto	T	-11.3776097		Gephyrocapsa	oceanica	140219
72_T45_Alfred Burian	11	C18:1w9c	1518.4	9.756	-29.385	E		Gcapsa 2.1	algae	hapto	T	-11.3776097		Gephyrocapsa	oceanica	140219
72_T45_Alfred Burian	12	C18:1w7c	1533.2	4.629	-26.944	E		Gcapsa 2.1	algae	hapto	T	-11.3776097		Gephyrocapsa	oceanica	140219
72_T45_Alfred Burian		C18:1w7c/9		14.385	-28.6	T	E	Gcapsa 2.1	algae	hapto	T	-11.3776097		Gephyrocapsa	oceanica	140219
72_T45_Alfred Burian	13	C19:0	1624.6	1.319	-36.346	A		Gcapsa 2.1	algae	hapto	T	-11.3776097		Gephyrocapsa	oceanica	140219
72_T45_Alfred Burian	14	C18:2w6c	1654.9	3.014	-30.305	A		Gcapsa 2.1	algae	hapto	T	-11.3776097		Gephyrocapsa	oceanica	140219
72_T45_Alfred Burian	15	C20:3w3+C20:4w6+C22:0	1822.5	1.261	-31.362	A		Gcapsa 2.1	algae	hapto	T	-11.3776097		Gephyrocapsa	oceanica	140219
72_T45_Alfred Burian	16	C18:4w3	1922	1.324	-31.741	A		Gcapsa 2.1	algae	hapto	T	-11.3776097		Gephyrocapsa	oceanica	140219
72_T45_Alfred Burian	17	C21:0	1988.6	2.06	-34.19	A		Gcapsa 2.1	algae	hapto	T	-11.3776097		Gephyrocapsa	oceanica	140219
72_T45_Alfred Burian		C18:5w3	2035	0.7	-37.7	B		Gcapsa 2.1	algae	hapto	T	-11.3776097		Gephyrocapsa	oceanica	140219
72_T45_Alfred Burian	18	C22:0	2136.2	1.064	-29.382	A		Gcapsa 2.1	algae	hapto	T	-11.3776097		Gephyrocapsa	oceanica	140219
72_T45_Alfred Burian	19	C22:5w6	2439.7	2.275	-28.536	A		Gcapsa 2.1	algae	hapto	T	-11.3776097		Gephyrocapsa	oceanica	140219
72_T45_Alfred Burian		C22:5w3	2506	1	-28.8	A		Gcapsa 2.1	algae	hapto	T	-11.3776097		Gephyrocapsa	oceanica	140219
72_T45_Alfred Burian	20	C22:6w3	2546.5	6.918	-28.868	A		Gcapsa 2.1	algae	hapto	T	-11.3776097		Gephyrocapsa	oceanica	140219
73_T54_Alfred Burian	7	C16:0	1080.3	15.694	-43.665	E		Duna t. 1.1	algae	green	T	-22.16		Dunaliella	tertiolecta	140219
73_T54_Alfred Burian	8	C16:1w9/7	1170	2.384	-42.444	T	1	Duna t. 1.1	algae	green	T	-22.16		Dunaliella	tertiolecta	140219
73_T54_Alfred Burian	9	C16:2w6	1279.5	1.306	-45.463	A		Duna t. 1.1	algae	green	T	-22.16		Dunaliella	tertiolecta	140219
73_T54_Alfred Burian	10	C16:4w3	1445.4	5.506	-43.494	A		Duna t. 1.1	algae	green	T	-22.16		Dunaliella	tertiolecta	140219
73_T54_Alfred Burian	11	C18:1w9c	1516.7	28.232	-45.043	E		Duna t. 1.1	algae	green	T	-22.16		Dunaliella	tertiolecta	140219
73_T54_Alfred Burian	12	C18:1w7c	1532.8	2.229	-37.573	E		Duna t. 1.1	algae	green	T	-22.16		Dunaliella	tertiolecta	140219
73_T54_Alfred Burian		C18:1w7c/9		30.461	-44.4	T	E	Duna t. 1.1	algae	green	T	-22.16		Dunaliella	tertiolecta	140219
73_T54_Alfred Burian	13	C19:0	1629.8	0.807	-28.774	A		Duna t. 1.1	algae	green	T	-22.16		Dunaliella	tertiolecta	140219
73_T54_Alfred Burian	14	C18:2w6c	1657	4.939	-46.738	A		Duna t. 1.1	algae	green	T	-22.16		Dunaliella	tertiolecta	140219
73_T54_Alfred Burian	15	C18:3w6	1753.5	3.236	-48.435	A		Duna t. 1.1	algae	green	T	-22.16		Dunaliella	tertiolecta	140219
73_T54_Alfred Burian	16	C18:3w3	1835.4	55.889	-44.481	A		Duna t. 1.1	algae	green	T	-22.16		Dunaliella	tertiolecta	140219
73_T54_Alfred Burian	17	C18:4w3	1923.6	1.219	-51.627	A		Duna t. 1.1	algae	green	T	-22.16		Dunaliella	tertiolecta	140219
73_T54_Alfred Burian	18	C21:0	1989.1	1.82	-35.182	A		Duna t. 1.1	algae	green	T	-22.16		Dunaliella	tertiolecta	140219
74_T17_Alfred Burian	5	C14:0	751.8	1.379	-39.353	A		Synechococc 1.1	algae	cyano	T	-29.42027135		Synechococcus		140219
74_T17_Alfred Burian	6	C14:1	848.3	3.62	-38.953	A		Synechococc 1.1	algae	cyano	T	-29.42027135		Synechococcus		140219
74_T17_Alfred Burian	8	C16:0	1079.7	15.487	-40.517	B		Synechococc 1.1	algae	cyano	T	-29.42027135		Synechococcus		140219
74_T17_Alfred Burian	9	C16:1w9/7	1167.1	11.05	-41.372	T	1	Synechococc 1.1	algae	cyano	T	-29.42027135		Synechococcus		140219
74_T17_Alfred Burian		C18:0	1437	0.4	-41.4	B		Synechococc 1.1	algae	cyano	T	-29.42027135		Synechococcus		140219
74_T17_Alfred Burian	10	C18:1w7c	1531.6	3.043	-37.357	A		Synechococc 1.1	algae	cyano	T	-29.42027135		Synechococcus		140219
74_T17_Alfred Burian		C18:1w5	1586	0.3	-41.26	C		Synechococc 1.1	algae	cyano	T	-29.42027135		Synechococcus		140219
74_T17_Alfred Burian	11	C19:0	1624.6	1.253	-35.086	A		Synechococc 1.1	algae	cyano	T	-29.42027135		Synechococcus		140219
74_T17_Alfred Burian	12	C21:0	1988.6	1.867	-32.31	A		Synechococc 1.1	algae	cyano	T	-29.42027135		Synechococcus		140219
75_T52_Alfred Burian	7	C16:0	1079.7	15.706	-26.5	B		C eme 1.1	algae	green	T	-16.49892888		Chlorella	emersonii	140219	Navicula	pelliculosa
75_T52_Alfred Burian	8	C16:1w9/7	1170	2.688	-28.32	T	1	C eme 1.1	algae	green	T	-16.49892888		Chlorella	emersonii	140219	Navicula	pelliculosa
75_T52_Alfred Burian	9	C16:4w3	1442.7	6.011	-23.392	A		C eme 1.1	algae	green	T	-16.49892888		Chlorella	emersonii	140219	Navicula	pelliculosa
75_T52_Alfred Burian	10	C18:1w9c	1514.6	17.389	-28.422	A		C eme 1.1	algae	green	T	-16.49892888		Chlorella	emersonii	140219	Navicula	pelliculosa
75_T52_Alfred Burian	11	C19:0	1628.1	1.744	-37.56	A		C eme 1.1	algae	green	T	-16.49892888		Chlorella	emersonii	140219	Navicula	pelliculosa
75_T52_Alfred Burian	12	C18:2w6c	1656.1	3.647	-28.818	A		C eme 1.1	algae	green	T	-16.49892888		Chlorella	emersonii	140219	Navicula	pelliculosa
75_T52_Alfred Burian	13	C18:3w3	1831.5	30.871	-28.174	A		C eme 1.1	algae	green	T	-16.49892888		Chlorella	emersonii	140219	Navicula	pelliculosa
75_T52_Alfred Burian	14	C18:4w3	1923.6	2.598	-34.486	A		C eme 1.1	algae	green	T	-16.49892888		Chlorella	emersonii	140219	Navicula	pelliculosa
75_T52_Alfred Burian	15	C21:0	1989.7	2.424	-34.78	A		C eme 1.1	algae	green	T	-16.49892888		Chlorella	emersonii	140219	Navicula	pelliculosa
76_T15_Alfred Burian	8	C16:0	1081.6	20.783	-27.5	B		Anab vir 1.1	algae	cyano	T	-14.18		Anabaena	vulgaris	140219
76_T15_Alfred Burian	9	C16:1w9/7	1169.1	18.235	-29.255	T	1	Anab vir 1.1	algae	cyano	T	-14.18		Anabaena	vulgaris	140219
76_T15_Alfred Burian	10	C16:2w4	1322.3	2.96	-32.698	A		Anab vir 1.1	algae	cyano	T	-14.18		Anabaena	vulgaris	140219
76_T15_Alfred Burian		C18:0	1439	0.5	-33.5	A		Anab vir 1.1	algae	cyano	T	-14.18		Anabaena	vulgaris	140219
76_T15_Alfred Burian		C16:4w1	1462	0.7	-35.5	A		Anab vir 1.1	algae	cyano	T	-14.18		Anabaena	vulgaris	140219
76_T15_Alfred Burian	11	C18:1w9c	1515.7	1.879	-26.057	A		Anab vir 1.1	algae	cyano	T	-14.18		Anabaena	vulgaris	140219
76_T15_Alfred Burian	12	C18:1w7c	1532	1.565	-26.59	A		Anab vir 1.1	algae	cyano	T	-14.18		Anabaena	vulgaris	140219
76_T15_Alfred Burian	13	C19:0	1627.9	1.296	-35.591	A		Anab vir 1.1	algae	cyano	T	-14.18		Anabaena	vulgaris	140219
76_T15_Alfred Burian	14	C18:2w6c	1656.5	5.496	-28.531	A		Anab vir 1.1	algae	cyano	T	-14.18		Anabaena	vulgaris	140219
76_T15_Alfred Burian	15	C18:3w3	1831.9	34.677	-30.175	A		Anab vir 1.1	algae	cyano	T	-14.18		Anabaena	vulgaris	140219
76_T15_Alfred Burian	16	C21:0	1988.6	1.724	-36.088	A		Anab vir 1.1	algae	cyano	T	-14.18		Anabaena	vulgaris	140219
77_T13_Alfred Burian	9	C16:0	1084.1	20.868	-34.351	C		Cori 1.1	algae	green	T	-23.74690595		Coricystis	minor	140219
77_T13_Alfred Burian	10	C16:1w13	1149.3	1.475	-37.653	A		Cori 1.1	algae	green	T	-23.74690595		Coricystis	minor	140219
77_T13_Alfred Burian	11	C16:1w9/7	1173.3	9.097	-36.329	T	1	Cori 1.1	algae	green	T	-23.74690595		Coricystis	minor	140219
77_T13_Alfred Burian	12	C16:2w6	1281.2	3.195	-37.875	A		Cori 1.1	algae	green	T	-23.74690595		Coricystis	minor	140219
77_T13_Alfred Burian	13	C16:4w3	1447.1	8.993	-36.697	A		Cori 1.1	algae	green	T	-23.74690595		Coricystis	minor	140219
77_T13_Alfred Burian	14	C18:1w9c	1518.6	42.405	-37.579	E		Cori 1.1	algae	green	T	-23.74690595		Coricystis	minor	140219
77_T13_Alfred Burian	15	C18:1w7c	1534.1	1.839	-32.999	E		Cori 1.1	algae	green	T	-23.74690595		Coricystis	minor	140219
77_T13_Alfred Burian	16	C18:1w7c/9	1633.1	44.244	-37.4	T	E	Cori 1.1	algae	green	T	-23.74690595		Coricystis	minor	140219
77_T13_Alfred Burian	16	C19:0	1633.1	1.772	-39.096	A		Cori 1.1	algae	green	T	-23.74690595		Coricystis	minor	140219
77_T13_Alfred Burian	17	C18:2w6c	1659.7	9.464	-37.592	A		Cori 1.1	algae	green	T	-23.74690595		Coricystis	minor	140219
77_T13_Alfred Burian	18	C18:3w6	1754.6	2.36	-44.394	A		Cori 1.1	algae	green	T	-23.74690595		Coricystis	minor	140219
77_T13_Alfred Burian	19	C18:3w3	1838.6	69.817	-37.928	A		Cori 1.1	algae	green	T	-23.74690595		Coricystis	minor	140219
77_T13_Alfred Burian	20	C18:4w3	1927.2	10.283	-42.861	A		Cori 1.1	algae	green	T	-23.74690595		Coricystis	minor	140219
77_T13_Alfred Burian	21	C21:0	1990.1	2.353	-36.388	A		Cori 1.1	algae	green	T	-23.74690595		Coricystis	minor	140219
77_T13_Alfred Burian	22	C20:3w3+C20:4w6+C22:0	2139.5	3.661	-39.052	A		Cori 1.1	algae	green	T	-23.74690595		Coricystis	minor	140219
78_T22_Alfred Burian	7	C16:0	1079.7	15.735	-32.289	B		Leptolyng 2.1	algae	cyano	T	-19.05753679		Leptolyngbia		140219
78_T22_Alfred Burian	8	C16:1w9/7	1167.1	11.641	-33.51	T	1	Leptolyng 2.1	algae	cyano	T	-19.05753679		Leptolyngbia		140219
78_T22_Alfred Burian	9	C18:0	1439	1.143	-32.798	A		Leptolyng 2.1	algae	cyano	T	-19.05753679		Leptolyngbia		140219
78_T22_Alfred Burian	10	C18:1w9c	1514.8	1.201	-32.326	E		Leptolyng 2.1	algae	cyano	T	-19.05753679		Leptolyngbia		140219
78_T22_Alfred Burian	11	C18:1w7c	1531.8	2.211	-27.716	E		Leptolyng 2.1	algae	cyano	T	-19.05753679		Leptolyngbia		140219
78_T22_Alfred Burian		C18:1w7c/9		3.412	-29.3	T	E	Leptolyng 2.1	algae	cyano	T	-19.05753679		Leptolyngbia		140219
78_T22_Alfred Burian	12	C19:0	1625.8	1.07	-34.594	A		Leptolyng 2.1	algae	cyano	T	-19.05753679		Leptolyngbia		140219
78_T22_Alfred Burian	13	C18:2w6c	1656.7	7.359	-32.836	A		Leptolyng 2.1	algae	cyano	T	-19.05753679		Leptolyngbia		140219
78_T22_Alfred Burian	14	C18:3w3	1827.7	16.694	-36.015	A		Leptolyng 2.1	algae	cyano	T	-19.05753679		Leptolyngbia		140219
78_T22_Alfred Burian	15	C21:0	1988.4	1.474	-34.218	A		Leptolyng 2.1	algae	cyano	T	-19.05753679		Leptolyngbia		140219
79_T44_Alfred Burian	5	C14:0	754.9	17.107	-27.62	A		Gcapsa 1.1	algae	hapto	T	-11.3776097		Gephyrocapsa	oceanica	140221
79_T44_Alfred Burian	8	C16:0	1077.6	8.823	-29.01	B		Gcapsa 1.1	algae	hapto	T	-11.3776097		Gephyrocapsa	oceanica	140221
79_T44_Alfred Burian	9	C16:1w9/7	1163.5	1.162	-29.977	T	1	Gcapsa 1.1	algae	hapto	T	-11.3776097		Gephyrocapsa	oceanica	140221
79_T44_Alfred Burian	10	C16:4w3	1442.5	3.621	-30.738	A		Gcapsa 1.1	algae	hapto	T	-11.3776097		Gephyrocapsa	oceanica	140221
79_T44_Alfred Burian	11	C18:1w9c	1519.8	10.849	-29.68	E		Gcapsa 1.1	algae	hapto	T	-11.3776097		Gephyrocapsa	oceanica	140221
79_T44_Alfred Burian	12	C18:1w7c	1534.5	5.003	-27.298	E		Gcapsa 1.1	algae	hapto	T	-11.3776097		Gephyrocapsa	oceanica	140221
79_T44_Alfred Burian		C18:1w7c/9		15.852	-28.7	T	E	Gcapsa 1.1	algae	hapto	T	-11.3776097		Gephyrocapsa	oceanica	140221
79_T44_Alfred Burian	13	C19:0	1626	1.488	-35.326	A		Gcapsa 1.1	algae	hapto	T	-11.3776097		Gephyrocapsa	oceanica	140221
79_T44_Alfred Burian	14	C18:2w6c	1655.9	3.396	-31.417	A		Gcapsa 1.1	algae	hapto	T	-11.3776097		Gephyrocapsa	oceanica	140221
79_T44_Alfred Burian	15	C20:3w3+C20:4w6+C22:0	1822.9	1.48	-32.586	A		Gcapsa 1.1	algae	hapto	T	-11.3776097		Gephyrocapsa	oceanica	140221
79_T44_Alfred Burian	16	C18:4w3	1922.4	1.464	-31.374	A		Gcapsa 1.1	algae	hapto	T	-11.3776097		Gephyrocapsa	oceanica	140221
79_T44_Alfred Burian	17	C21:0	1990.3	2.333	-32.064	A		Gcapsa 1.1	algae	hapto	T	-11.3776097		Gephyrocapsa	oceanica	140221
79_T44_Alfred Burian		C18:5w3	2035	0.768	-32.666	A		Gcapsa 1.1	algae	hapto	T	-11.3776097		Gephyrocapsa	oceanica	140221
79_T44_Alfred Burian		C20:3w3+C20:4w6+C22:0	2137	0.797	-30.9	A		Gcapsa 1.1	algae	hapto	T	-11.3776097		Gephyrocapsa	oceanica	140221
79_T44_Alfred Burian	18	C22:5w6	2440.1	2.597	-27.555	A		Gcapsa 1.1	algae	hapto	T	-11.3776097		Gephyrocapsa	oceanica	140221
79_T44_Alfred Burian	19	C22:5w3	2510.5	1.074	-28.391	A		Gcapsa 1.1	algae	hapto	T	-11.3776097		Gephyrocapsa	oceanica	140221
79_T44_Alfred Burian	20	C22:6w3	2547.1	7.42	-28.284	E		Gcapsa 1.1	algae	hapto	T	-11.3776097		Gephyrocapsa	oceanica	140221
104_T30_Alfred Burian	8	C16:0	1084.7	25.409	-31.801	E		Chlamy 2.1	algae	green	T	-20.41		Chlamydomonas	reinhardtii	140224
104_T30_Alfred Burian	9	C16:1w13	1149.9	0.92	-31.7	A		Chlamy 2.1	algae	green	T	-20.41		Chlamydomonas	reinhardtii	140224
104_T30_Alfred Burian	10	C16:1w9/7	1172.3	2.361	-32.402	T	1	Chlamy 2.1	algae	green	T	-20.41		Chlamydomonas	reinhardtii	140224
104_T30_Alfred Burian	11	C16:2w6	1281.4	0.869	-30.962	A		Chlamy 2.1	algae	green	T	-20.41		Chlamydomonas	reinhardtii	140224
104_T30_Alfred Burian	12	C16:4w3	1445.7	4.158	-31.934	A		Chlamy 2.1	algae	green	T	-20.41		Chlamydomonas	reinhardtii	140224
104_T30_Alfred Burian	13	C18:1w9c	1515.3	8.41	-32.021	E		Chlamy 2.1	algae	green	T	-20.41		Chlamydomonas	reinhardtii	140224
104_T30_Alfred Burian	14	C18:1w7c	1537.4	6.833	-30.076	E		Chlamy 2.1	algae	green	T	-20.41		Chlamydomonas	reinhardtii	140224
104_T30_Alfred Burian	14	C18:1w7c/9	1537.4	15.243	-31.193	T	E	Chlamy 2.1	algae	green	T	-20.41		Chlamydomonas	reinhardtii	140224
104_T30_Alfred Burian	15	C19:0	1659.9	6.52	-32.183	A		Chlamy 2.1	algae	green	T	-20.41		Chlamydomonas	reinhardtii	140224
104_T30_Alfred Burian	16	C18:2w4	1720.1	5.231	-33.792	A		Chlamy 2.1	algae	green	T	-20.41		Chlamydomonas	reinhardtii	140224
104_T30_Alfred Burian	17	C18:3w3	1830.6	16.992	-32.075	A		Chlamy 2.1	algae	green	T	-20.41		Chlamydomonas	reinhardtii	140224
104_T30_Alfred Burian	18	C20:1w9	1891.2	1.595	-35.503	A		Chlamy 2.1	algae	green	T	-20.41		Chlamydomonas	reinhardtii	140224
104_T30_Alfred Burian	19	C21:0	1992.8	1.801	-33.873	A		Chlamy 2.1	algae	green	T	-20.41		Chlamydomonas	reinhardtii	140224
92_T75_Alfred Burian	5	C14:0	754.5	12.852	-24.666	A		Chaet 2.1	algae	diatom	T	-14.38		Chaetocerus	old	140221	Dunaliella	tertiolecta
92_T75_Alfred Burian	6	C14:1	828.5	1.191	-22.405	A		Chaet 2.1	algae	diatom	T	-14.38		Chaetocerus	old	140221	Dunaliella	tertiolecta
92_T75_Alfred Burian	8	C16:0	1076.3	4.621	-26.097	B		Chaet 2.1	algae	diatom	T	-14.38		Chaetocerus	old	140221	Dunaliella	tertiolecta
92_T75_Alfred Burian	9	C16:1w9/7	1165.4	6.962	-24.428	T	1	Chaet 2.1	algae	diatom	T	-14.38		Chaetocerus	old	140221	Dunaliella	tertiolecta
92_T75_Alfred Burian		C16:1w5	1187	0.52	-21.4	A		Chaet 2.1	algae	diatom	T	-14.38		Chaetocerus	old	140221	Dunaliella	tertiolecta
92_T75_Alfred Burian	10	C16:2w4	1321.9	1.742	-24.686	A		Chaet 2.1	algae	diatom	T	-14.38		Chaetocerus	old	140221	Dunaliella	tertiolecta
92_T75_Alfred Burian	11	C16:3w3	1424.3	1.221	-25.643	E		Chaet 2.1	algae	diatom	T	-14.38		Chaetocerus	old	140221	Dunaliella	tertiolecta
92_T75_Alfred Burian		C16:3w3/4w3	1439	2.963	-26.33	T	E	Chaet 2.1	algae	diatom	T	-14.38		Chaetocerus	old	140221	Dunaliella	tertiolecta
92_T75_Alfred Burian		C18:0	1439	0.9	-27.24	E		Chaet 2.1	algae	diatom	T	-14.38		Chaetocerus	old	140221	Dunaliella	tertiolecta
92_T75_Alfred Burian	12	C18:1w7c	1532.6	3.278	-23.149	C		Chaet 2.1	algae	diatom	T	-14.38		Chaetocerus	old	140221	Dunaliella	tertiolecta
92_T75_Alfred Burian	13	C18:1w5	1570.2	3.182	-30.858	C		Chaet 2.1	algae	diatom	T	-14.38		Chaetocerus	old	140221	Dunaliella	tertiolecta
92_T75_Alfred Burian	14	C19:0	1625.8	1.185	-35.396	A		Chaet 2.1	algae	diatom	T	-14.38		Chaetocerus	old	140221	Dunaliella	tertiolecta
92_T75_Alfred Burian	15	C21:0	1989.9	2.085	-31.808	A		Chaet 2.1	algae	diatom	T	-14.38		Chaetocerus	old	140221	Dunaliella	tertiolecta
92_T75_Alfred Burian	16	C23:0	2267.6	0.988	-25.646	A		Chaet 2.1	algae	diatom	T	-14.38		Chaetocerus	old	140221	Dunaliella	tertiolecta
96_T73_Alfred Burian	5	C14:0	755.1	14.159	-28.489	A		Skeletonema T	algae	diatom	T	-16.6794928		Skeletonema	marinoi	140221	Emiliana	huxleyi cal
96_T73_Alfred Burian	6	C14:1	829.1	2.437	-25.163	A		Skeletonema T	algae	diatom	T	-16.6794928		Skeletonema	marinoi	140221	Emiliana	huxleyi cal
96_T73_Alfred Burian	9	C16:0	1077	4.708	-28.318	B		Skeletonema T	algae	diatom	T	-16.6794928		Skeletonema	marinoi	140221	Emiliana	huxleyi cal
96_T73_Alfred Burian	10	C16:1w9/7	1166.2	8.016	-28.487	T	1	Skeletonema T	algae	diatom	T	-16.6794928		Skeletonema	marinoi	140221	Emiliana	huxleyi cal
96_T73_Alfred Burian	11	C16:2w7	1267	1.956	-30.716	A		Skeletonema T	algae	diatom	T	-16.6794928		Skeletonema	marinoi	140221	Emiliana	huxleyi cal
96_T73_Alfred Burian	12	C16:2w4	1322.6	2.568	-28.583	A		Skeletonema T	algae	diatom	T	-16.6794928		Skeletonema	marinoi	140221	Emiliana	huxleyi cal
96_T73_Alfred Burian	13	C16:3w3	1424.8	1.761	-31.087	A		Skeletonema T	algae	diatom	T	-16.6794928		Skeletonema	marinoi	140221	Emiliana	huxleyi cal
96_T73_Alfred Burian	14	C18:1w7c	1533.4	3.641	-25.296	A		Skeletonema T	algae	diatom	T	-16.6794928		Skeletonema	marinoi	140221	Emiliana	huxleyi cal
96_T73_Alfred Burian	15	C18:1w5	1570.2	1.845	-34.875	A		Skeletonema T	algae	diatom	T	-16.6794928		Skeletonema	marinoi	140221	Emiliana	huxleyi cal
96_T73_Alfred Burian	16	C19:0	1626.2	1.211	-37.568	A		Skeletonema T	algae	diatom	T	-16.6794928		Skeletonema	marinoi	140221	Emiliana	huxleyi cal
96_T73_Alfred Burian	17	C18:2w6c	1654.7	1.002	-36.161	A		Skeletonema T	algae	diatom	T	-16.6794928		Skeletonema	marinoi	140221	Emiliana	huxleyi cal
96_T73_Alfred Burian		C18:3w6	1752	0.458	-37.5	A		Skeletonema T	algae	diatom	T	-16.6794928		Skeletonema	marinoi	140221	Emiliana	huxleyi cal
96_T73_Alfred Burian	18	C18:4w3	1922.8	1.565	-33.294	A		Skeletonema T	algae	diatom	T	-16.6794928		Skeletonema	marinoi	140221	Emiliana	huxleyi cal
96_T73_Alfred Burian	19	C21:0	1990.7	2.074	-32.999	A		Skeletonema T	algae	diatom	T	-16.6794928		Skeletonema	marinoi	140221	Emiliana	huxleyi cal
96_T73_Alfred Burian		C18:5w3	2041	0.4	-30.7	B		Skeletonema T	algae	diatom	T	-16.6794928		Skeletonema	marinoi	140221	Emiliana	huxleyi cal
96_T73_Alfred Burian		C20:3w3+C20:4w6+C22:0	2143	0.44	-31.2	A		Skeletonema T	algae	diatom	T	-16.6794928		Skeletonema	marinoi	140221	Emiliana	huxleyi cal
96_T73_Alfred Burian	20	C20:5w3	2269.5	7.986	-30.66	A		Skeletonema T	algae	diatom	T	-16.6794928		Skeletonema	marinoi	140221	Emiliana	huxleyi cal
96_T73_Alfred Burian	21	C22:6w3	2546	1.28	-35.676	A		Skeletonema T	algae	diatom	T	-16.6794928		Skeletonema	marinoi	140221	Emiliana	huxleyi cal
99_T65_Alfred Burian	9	C16:0	1086.2	18.511	-42.612	B		D. Sal 2.1	algae	green	T	-31.58043364		Dunaliella	salina	140221	Phaeodactylum	tricornutum
99_T65_Alfred Burian	10	C16:1w9/7	1174.6	3.615	-44.337	T	1	D. Sal 2.1	algae	green	T	-31.58043364		Dunaliella	salina	140221	Phaeodactylum	tricornutum
99_T65_Alfred Burian	11	C16:2w6	1283.7	4.374	-40.904	A		D. Sal 2.1	algae	green	T	-31.58043364		Dunaliella	salina	140221	Phaeodactylum	tricornutum
99_T65_Alfred Burian	12	C16:3w4	1347.4	6.91	-50.9	C		D. Sal 2.1	algae	green	T	-31.58043364		Dunaliella	salina	140221	Phaeodactylum	tricornutum
99_T65_Alfred Burian	14	C16:4w3	1449.4	6.695	-46.519	A		D. Sal 2.1	algae	green	T	-31.58043364		Dunaliella	salina	140221	Phaeodactylum	tricornutum
99_T65_Alfred Burian	15	C18:1w9c	1521.5	39.251	-49.463	E		D. Sal 2.1	algae	green	T	-31.58043364		Dunaliella	salina	140221	Phaeodactylum	tricornutum
99_T65_Alfred Burian	16	C18:1w7c	1539.5	4.907	-42.626	E		D. Sal 2.1	algae	green	T	-31.58043364		Dunaliella	salina	140221	Phaeodactylum	tricornutum
99_T65_Alfred Burian	16	C18:1w7c/9	1539.5	44.158	-48.7	T	E	D. Sal 2.1	algae	green	T	-31.58043364		Dunaliella	salina	140221	Phaeodactylum	tricornutum
99_T65_Alfred Burian	17	C19:0	1625.2	1.22	-54.125	E		D. Sal 2.1	algae	green	T	-31.58043364		Dunaliella	salina	140221	Phaeodactylum	tricornutum
99_T65_Alfred Burian	19	C18:2w6c	1665.3	19.191	-40.207	A		D. Sal 2.1	algae	green	T	-31.58043364		Dunaliella	salina	140221	Phaeodactylum	tricornutum
99_T65_Alfred Burian	20	C18:3w6	1760.8	14.226	-55.999	B		D. Sal 2.1	algae	green	T	-31.58043364		Dunaliella	salina	140221	Phaeodactylum	tricornutum
99_T65_Alfred Burian	21	C18:3w3	1843.4	84.68	-49.374	A		D. Sal 2.1	algae	green	T	-31.58043364		Dunaliella	salina	140221	Phaeodactylum	tricornutum
99_T65_Alfred Burian	22	C18:4w3	1927.8	1.5	-63.573	B		D. Sal 2.1	algae	green	T	-31.58043364		Dunaliella	salina	140221	Phaeodactylum	tricornutum
99_T65_Alfred Burian	23	C21:0	1992.8	1.515	-36.919	A		D. Sal 2.1	algae	green	T	-31.58043364		Dunaliella	salina	140221	Phaeodactylum	tricornutum
105_T73_Alfred Burian	8	C16:0	1081.6	18.609	-36.73	B		Ana Kiel 1.1 B+A	algae	cyano	M	-19.34	probabl. wrong label	Anabaena	Kiel	140224	Emiliana	huxleyi cal
105_T73_Alfred Burian	9	C16:1w9/7	1167.7	11.112	-33.128	T	1	Ana Kiel 1.1 B+A	algae	cyano	M	-19.34	probabl. wrong label	Anabaena	Kiel	140224	Emiliana	huxleyi cal
105_T73_Alfred Burian		C16:2w4	1321	0.5	-34.3	s		Ana Kiel 1.1 B+A	algae	cyano	M	-19.34	probabl. wrong label	Anabaena	Kiel	140224	Emiliana	huxleyi cal
105_T73_Alfred Burian	10	C18:0	1442.9	1.967	-34.956	A		Ana Kiel 1.1 B+A	algae	cyano	M	-19.34	probabl. wrong label	Anabaena	Kiel	140224	Emiliana	huxleyi cal
105_T73_Alfred Burian	11	C18:1w9c	1518.2	4.422	-39.413	E		Ana Kiel 1.1 B+A	algae	cyano	M	-19.34	probabl. wrong label	Anabaena	Kiel	140224	Emiliana	huxleyi cal
105_T73_Alfred Burian	12	C18:1w7c	1536.8	9.972	-29.177	E		Ana Kiel 1.1 B+A	algae	cyano	M	-19.34	probabl. wrong label	Anabaena	Kiel	140224	Emiliana	huxleyi cal
105_T73_Alfred Burian		C18:1w7c/9		14.394	-32.33	T	E	Ana Kiel 1.1 B+A	algae	cyano	M	-19.34	probabl. wrong label	Anabaena	Kiel	140224	Emiliana	huxleyi cal
105_T73_Alfred Burian	13	C19:0	1627.9	1.445	-38.002	A		Ana Kiel 1.1 B+A	algae	cyano	M	-19.34	probabl. wrong label	Anabaena	Kiel	140224	Emiliana	huxleyi cal
105_T73_Alfred Burian	14	C18:2w6c	1658.4	8.492	-35.786	A		Ana Kiel 1.1 B+A	algae	cyano	M	-19.34	probabl. wrong label	Anabaena	Kiel	140224	Emiliana	huxleyi cal
105_T73_Alfred Burian	15	C18:3w3	1827.1	11.084	-32.937	A		Ana Kiel 1.1 B+A	algae	cyano	M	-19.34	probabl. wrong label	Anabaena	Kiel	140224	Emiliana	huxleyi cal
105_T73_Alfred Burian	16	C21:0	1990.9	2.045	-34.658	A		Ana Kiel 1.1 B+A	algae	cyano	M	-19.34	probabl. wrong label	Anabaena	Kiel	140224	Emiliana	huxleyi cal
112_T102_Alfred Burian	5	C14:0	753	3.717	-27.381	A		Rot. Chlam 4.4+4.3	Chem_C	Rotifer	T	-23.05640797		Brach_C	plicatilis	140224
112_T102_Alfred Burian	8	C16:0	1082.2	20.733	-28.112	B		Rot. Chlam 4.4+4.3	Chem_C	Rotifer	T	-23.05640797		Brach_C	plicatilis	140224
112_T102_Alfred Burian	9	C16:1w9/7	1166	4.852	-29.404	T	1	Rot. Chlam 4.4+4.3	Chem_C	Rotifer	T	-23.05640797		Brach_C	plicatilis	140224
112_T102_Alfred Burian		C17:0	1255	0.7	-29.202	A		Rot. Chlam 4.4+4.3	Chem_C	Rotifer	T	-23.05640797		Brach_C	plicatilis	140224
112_T102_Alfred Burian	10	C16:3w3	1402.4	2.01	-30.567	A		Rot. Chlam 4.4+4.3	Chem_C	Rotifer	T	-23.05640797		Brach_C	plicatilis	140224
112_T102_Alfred Burian	11	C16:4w3	1444.4	4.097	-29.735	A		Rot. Chlam 4.4+4.3	Chem_C	Rotifer	T	-23.05640797		Brach_C	plicatilis	140224
112_T102_Alfred Burian	12	C18:1w9t	1485.8	2.551	-30.151	A		Rot. Chlam 4.4+4.3	Chem_C	Rotifer	T	-23.05640797		Brach_C	plicatilis	140224
112_T102_Alfred Burian	13	C18:1w9c	1517.5	2.773	-28.487	A		Rot. Chlam 4.4+4.3	Chem_C	Rotifer	T	-23.05640797		Brach_C	plicatilis	140224
112_T102_Alfred Burian	14	C18:1w7c	1535.3	4.202	-26.419	A		Rot. Chlam 4.4+4.3	Chem_C	Rotifer	T	-23.05640797		Brach_C	plicatilis	140224
112_T102_Alfred Burian	15	C18:1w5	1588.6	1.141	-36.187	A		Rot. Chlam 4.4+4.3	Chem_C	Rotifer	T	-23.05640797		Brach_C	plicatilis	140224
112_T102_Alfred Burian	16	?	1628.7	1.142	-36.625	A		Rot. Chlam 4.4+4.3	Chem_C	Rotifer	T	-23.05640797		Brach_C	plicatilis	140224
112_T102_Alfred Burian	17	C19:0	1639.4	2.571	-29.329	B		Rot. Chlam 4.4+4.3	Chem_C	Rotifer	T	-23.05640797		Brach_C	plicatilis	140224
112_T102_Alfred Burian	18	C18:2w6c	1658.2	6.168	-29.173	A		Rot. Chlam 4.4+4.3	Chem_C	Rotifer	T	-23.05640797		Brach_C	plicatilis	140224
112_T102_Alfred Burian	19	C18:2w4	1717.4	1.076	-28.659	A		Rot. Chlam 4.4+4.3	Chem_C	Rotifer	T	-23.05640797		Brach_C	plicatilis	140224
112_T102_Alfred Burian	20	C18:3w6	1753.5	2.084	-34.924	A		Rot. Chlam 4.4+4.3	Chem_C	Rotifer	T	-23.05640797		Brach_C	plicatilis	140224
112_T102_Alfred Burian	21	C18:3w3	1826.7	8.548	-32.506	A		Rot. Chlam 4.4+4.3	Chem_C	Rotifer	T	-23.05640797		Brach_C	plicatilis	140224
112_T102_Alfred Burian	22	?	1875.4	1.412	-32.95	E		Rot. Chlam 4.4+4.3	Chem_C	Rotifer	T	-23.05640797		Brach_C	plicatilis	140224
112_T102_Alfred Burian	23	C20:1w9	1888.5	1.358	-30.717	C		Rot. Chlam 4.4+4.3	Chem_C	Rotifer	T	-23.05640797		Brach_C	plicatilis	140224
112_T102_Alfred Burian	24	C18:4w3	1923.4	1.147	-33.5	B		Rot. Chlam 4.4+4.3	Chem_C	Rotifer	T	-23.05640797		Brach_C	plicatilis	140224
112_T102_Alfred Burian	25	?	2084.8	0.701	-27.493	A		Rot. Chlam 4.4+4.3	Chem_C	Rotifer	T	-23.05640797		Brach_C	plicatilis	140224
112_T102_Alfred Burian	26	C20:3w6	2092.1	3.323	-31.116	A		Rot. Chlam 4.4+4.3	Chem_C	Rotifer	T	-23.05640797		Brach_C	plicatilis	140224
112_T102_Alfred Burian	27	C20:3w3+C20:4w6+C22:0	2144.8	4.098	-31.525	A		Rot. Chlam 4.4+4.3	Chem_C	Rotifer	T	-23.05640797		Brach_C	plicatilis	140224
112_T102_Alfred Burian	28	C20:4w3	2220	6.903	-29.806	B		Rot. Chlam 4.4+4.3	Chem_C	Rotifer	T	-23.05640797		Brach_C	plicatilis	140224
112_T102_Alfred Burian	29	C20:5w3	2268.9	1.868	-31.154	A		Rot. Chlam 4.4+4.3	Chem_C	Rotifer	T	-23.05640797		Brach_C	plicatilis	140224
112_T102_Alfred Burian		?	2361	0.8	-31.833	A		Rot. Chlam 4.4+4.3	Chem_C	Rotifer	T	-23.05640797		Brach_C	plicatilis	140224
112_T102_Alfred Burian		C22:5w3	2505	0.6	-34.99	A		Rot. Chlam 4.4+4.3	Chem_C	Rotifer	T	-23.05640797		Brach_C	plicatilis	140224
112_T102_Alfred Burian		C22:6w3	2546	0.4	-33.8	A		Rot. Chlam 4.4+4.3	Chem_C	Rotifer	T	-23.05640797		Brach_C	plicatilis	140224
113_T103_Alfred Burian	5	C14:0	753.9	4.467	-27.265	A		Achnantes 5.73mg DW	algae	diatom	T	-16.09		Achnantes		140224
113_T103_Alfred Burian	7	C16:0	1089.7	43.056	-27.625	A		Achnantes 5.73mg DW	algae	diatom	T	-16.09		Achnantes		140224
113_T103_Alfred Burian	8	C16:1w9/7	1177.7	48.997	-28.238	T	1	Achnantes 5.73mg DW	algae	diatom	T	-16.09		Achnantes		140224
113_T103_Alfred Burian	10	C16:2w4	1325.5	4.729	-34.177	A		Achnantes 5.73mg DW	algae	diatom	T	-16.09		Achnantes		140224
113_T103_Alfred Burian	11	C16:3w3	1426.8	2.39	-38.164	E		Achnantes 5.73mg DW	algae	diatom	T	-16.09		Achnantes		140224
113_T103_Alfred Burian	12	C16:4w3	1440.8	1.503	-28.574	E		Achnantes 5.73mg DW	algae	diatom	T	-16.09		Achnantes		140224
113_T103_Alfred Burian	3	C16:3w3/4w3	1440.8	3.893	-34.55	T	E	Achnantes 5.73mg DW	algae	diatom	T	-16.09		Achnantes		140224
113_T103_Alfred Burian		C18:1w9c		0.6	-36.02	A		Achnantes 5.73mg DW	algae	diatom	T	-16.09		Achnantes		140224
113_T103_Alfred Burian		C18:1w7c	1533	0.7	-30.9	A		Achnantes 5.73mg DW	algae	diatom	T	-16.09		Achnantes		140224
113_T103_Alfred Burian		C18:1w5	1571	0.6	-47.3	C		Achnantes 5.73mg DW	algae	diatom	T	-16.09		Achnantes		140224
113_T103_Alfred Burian		C19:0		1		D		Achnantes 5.73mg DW	algae	diatom	T	-16.09		Achnantes		140224
113_T103_Alfred Burian		C18:4w3	1923	0.7	-41.08	A		Achnantes 5.73mg DW	algae	diatom	T	-16.09		Achnantes		140224
113_T103_Alfred Burian	13	C20:5w3	2271.6	15.677	-30.801	A		Achnantes 5.73mg DW	algae	diatom	T	-16.09		Achnantes		140224
113_T103_Alfred Burian	14	C22:6w3	2546.9	2.426	-32.042	A		Achnantes 5.73mg DW	algae	diatom	T	-16.09		Achnantes		140224
97_T66_Alfred Burian	5	C14:0	753.4	2.154	-37.323	A		Phae 1.1	algae	diatom	T	-26.33934676		Phaeodactylum	tricornutum	140221	Dunaliella	salina
97_T66_Alfred Burian	8	C16:0	1079.9	7.905	-37.4	B		Phae 1.1	algae	diatom	T	-26.33934676		Phaeodactylum	tricornutum	140221	Dunaliella	salina
97_T66_Alfred Burian	9	C16:1w9/7	1168.3	8.476	-38.625	T	1	Phae 1.1	algae	diatom	T	-26.33934676		Phaeodactylum	tricornutum	140221	Dunaliella	salina
97_T66_Alfred Burian	10	C16:2w4	1324.2	1.446	-37.253	A		Phae 1.1	algae	diatom	T	-26.33934676		Phaeodactylum	tricornutum	140221	Dunaliella	salina
97_T66_Alfred Burian	11	C16:3w3	1428.1	4.469	-41.157	E		Phae 1.1	algae	diatom	T	-26.33934676		Phaeodactylum	tricornutum	140221	Dunaliella	salina
97_T66_Alfred Burian	12	C16:4w3	1441.9	1.263	-34.6	E		Phae 1.1	algae	diatom	T	-26.33934676		Phaeodactylum	tricornutum	140221	Dunaliella	salina
97_T66_Alfred Burian		C16:4w3/C16:3w3		5.732	-39.1	T	E	Phae 1.1	algae	diatom	T	-26.33934676		Phaeodactylum	tricornutum	140221	Dunaliella	salina
97_T66_Alfred Burian	13	C18:1w9c	1515.7	6.424	-42.098	A		Phae 1.1	algae	diatom	T	-26.33934676		Phaeodactylum	tricornutum	140221	Dunaliella	salina
97_T66_Alfred Burian	14	C19:0	1629.8	1.713	-36.298	A		Phae 1.1	algae	diatom	T	-26.33934676		Phaeodactylum	tricornutum	140221	Dunaliella	salina
97_T66_Alfred Burian	15	C18:2w6c	1657.6	1.093	-41.223	A		Phae 1.1	algae	diatom	T	-26.33934676		Phaeodactylum	tricornutum	140221	Dunaliella	salina
97_T66_Alfred Burian	16	C18:3w6	1755	1.044	-44.41	A		Phae 1.1	algae	diatom	T	-26.33934676		Phaeodactylum	tricornutum	140221	Dunaliella	salina
97_T66_Alfred Burian	17	C18:3w3	1829.8	12.348	-41.046	A		Phae 1.1	algae	diatom	T	-26.33934676		Phaeodactylum	tricornutum	140221	Dunaliella	salina
97_T66_Alfred Burian		C18:4w3	1925	0.8	-49.67	A		Phae 1.1	algae	diatom	T	-26.33934676		Phaeodactylum	tricornutum	140221	Dunaliella	salina
97_T66_Alfred Burian	18	C21:0	1994.1	2.463	-33.397	A		Phae 1.1	algae	diatom	T	-26.33934676		Phaeodactylum	tricornutum	140221	Dunaliella	salina
97_T66_Alfred Burian	19	C20:3w3+C20:4w6+C22:0	2145.8	1.978	-42.505	A		Phae 1.1	algae	diatom	T	-26.33934676		Phaeodactylum	tricornutum	140221	Dunaliella	salina
97_T66_Alfred Burian	20	C20:5w3	2272.7	12.953	-41.399	A		Phae 1.1	algae	diatom	T	-26.33934676		Phaeodactylum	tricornutum	140221	Dunaliella	salina
93_T51_Alfred Burian	7	C16:0	1079.5	13.209	-35.623	B		Tetra 2.1	algae	green	T	-22.91531202		Tetraselmis	suecica	140221
93_T51_Alfred Burian	8	C16:4w3	1444	1.663	-35.389	B		Tetra 2.1	algae	green	T	-22.91531202		Tetraselmis	suecica	140221
93_T51_Alfred Burian	9	C18:1w9c	1514	13.965	-39.328	E		Tetra 2.1	algae	green	T	-22.91531202		Tetraselmis	suecica	140221
93_T51_Alfred Burian	10	C18:1w7c	1532.8	2.574	-35.957	E		Tetra 2.1	algae	green	T	-22.91531202		Tetraselmis	suecica	140221
93_T51_Alfred Burian		C18:1w7c/9		16.539	-38.8	T	E	Tetra 2.1	algae	green	T	-22.91531202		Tetraselmis	suecica	140221
93_T51_Alfred Burian	11	C19:0	1627.1	1.557	-36.335	A		Tetra 2.1	algae	green	T	-22.91531202		Tetraselmis	suecica	140221
93_T51_Alfred Burian	12	C18:2w6c	1655.5	2.14	-37.884	A		Tetra 2.1	algae	green	T	-22.91531202		Tetraselmis	suecica	140221
93_T51_Alfred Burian	13	C18:3w6	1752.7	2.163	-37.31	A		Tetra 2.1	algae	green	T	-22.91531202		Tetraselmis	suecica	140221
93_T51_Alfred Burian	14	C18:3w3	1826.2	9.201	-41.196	A		Tetra 2.1	algae	green	T	-22.91531202		Tetraselmis	suecica	140221
93_T51_Alfred Burian		C20:1w9	1866	0.8	-44.48	A		Tetra 2.1	algae	green	T	-22.91531202		Tetraselmis	suecica	140221
93_T51_Alfred Burian	15	C18:4w3	1924.1	5.434	-41.594	A		Tetra 2.1	algae	green	T	-22.91531202		Tetraselmis	suecica	140221
93_T51_Alfred Burian	16	C21:0	1990.7	2.093	-34.875	A		Tetra 2.1	algae	green	T	-22.91531202		Tetraselmis	suecica	140221
93_T51_Alfred Burian	17	C18:5w3	2035.9	0.897	-45.45	A		Tetra 2.1	algae	green	T	-22.91531202		Tetraselmis	suecica	140221
93_T51_Alfred Burian	18	C20:5w3	2268.7	4.795	-38.297	A		Tetra 2.1	algae	green	T	-22.91531202		Tetraselmis	suecica	140221
95_T63_Alfred Burian	5	C14:0	755.3	15.949	-24.867	A		Chaet 1.1	algae	diatom	T	-14.38		Chaetocerus	old	140221	Chaetocerus	old
95_T63_Alfred Burian	8	C16:0	1077.2	5.641	-25.868	B		Chaet 1.1	algae	diatom	T	-14.38		Chaetocerus	old	140221	Chaetocerus	old
95_T63_Alfred Burian	9	C16:1w9/7	1166.2	8.712	-24.848	T	1	Chaet 1.1	algae	diatom	T	-14.38		Chaetocerus	old	140221	Chaetocerus	old
95_T63_Alfred Burian		C16:1w5	1188	0.8	-25.01	C		Chaet 1.1	algae	diatom	T	-14.38		Chaetocerus	old	140221	Chaetocerus	old
95_T63_Alfred Burian	10	C16:2w7	1267.2	1.025	-26.319	A		Chaet 1.1	algae	diatom	T	-14.38		Chaetocerus	old	140221	Chaetocerus	old
95_T63_Alfred Burian	11	C16:2w4	1322.3	2.155	-25.585	B		Chaet 1.1	algae	diatom	T	-14.38		Chaetocerus	old	140221	Chaetocerus	old
95_T63_Alfred Burian	12	C16:3w3	1424.8	1.541	-26.607	B		Chaet 1.1	algae	diatom	T	-14.38		Chaetocerus	old	140221	Chaetocerus	old
95_T63_Alfred Burian	13	C18:0	1439.8	1.402	-26.21	A		Chaet 1.1	algae	diatom	T	-14.38		Chaetocerus	old	140221	Chaetocerus	old
95_T63_Alfred Burian		C18:1w9c	1515	0.7	-30.6777	A		Chaet 1.1	algae	diatom	T	-14.38		Chaetocerus	old	140221	Chaetocerus	old
95_T63_Alfred Burian	14	C18:1w7c	1533.6	4.057	-24.784	A		Chaet 1.1	algae	diatom	T	-14.38		Chaetocerus	old	140221	Chaetocerus	old
95_T63_Alfred Burian	15	C18:1w5	1570.8	3.833	-30.27	A		Chaet 1.1	algae	diatom	T	-14.38		Chaetocerus	old	140221	Chaetocerus	old
95_T63_Alfred Burian		?	1587	0.4	-33.4	F		Chaet 1.1	algae	diatom	T	-14.38		Chaetocerus	old	140221	Chaetocerus	old
95_T63_Alfred Burian	16	C19:0	1626.4	1.621	-38.649	A		Chaet 1.1	algae	diatom	T	-14.38		Chaetocerus	old	140221	Chaetocerus	old
95_T63_Alfred Burian		C18:2w6c	1654	0.5	-34.3	A		Chaet 1.1	algae	diatom	T	-14.38		Chaetocerus	old	140221	Chaetocerus	old
95_T63_Alfred Burian	17	C21:0	1990.9	2.575	-34.233	A		Chaet 1.1	algae	diatom	T	-14.38		Chaetocerus	old	140221	Chaetocerus	old
95_T63_Alfred Burian	18	C20:5w3	2267.9	1.659	-28.347	A		Chaet 1.1	algae	diatom	T	-14.38		Chaetocerus	old	140221	Chaetocerus	old
98_T68_Alfred Burian	5	C14:0	754.7	11.938	-27.806	A		T. Weis 2.1	algae	diatom	T	-18.36094371		Thalassiosira	weissflogii	140221
98_T68_Alfred Burian	7	C16:0	1087.8	35.928	-27.481	B		T. Weis 2.1	algae	diatom	T	-18.36094371		Thalassiosira	weissflogii	140221
98_T68_Alfred Burian	8	C16:1w9/7	1176.5	48.737	-28.284	T	1	T. Weis 2.1	algae	diatom	T	-18.36094371		Thalassiosira	weissflogii	140221
98_T68_Alfred Burian	10	C16:2w4	1324.2	3.284	-33.844	A		T. Weis 2.1	algae	diatom	T	-18.36094371		Thalassiosira	weissflogii	140221
98_T68_Alfred Burian	11	C16:3w3	1426.6	4.035	-36.181	A		T. Weis 2.1	algae	diatom	T	-18.36094371		Thalassiosira	weissflogii	140221
98_T68_Alfred Burian	12	C18:1w7c	1532.8	1.776	-28.018	A		T. Weis 2.1	algae	diatom	T	-18.36094371		Thalassiosira	weissflogii	140221
98_T68_Alfred Burian	13	C18:2w6c	1655.3	0.866	-37.387	A		T. Weis 2.1	algae	diatom	T	-18.36094371		Thalassiosira	weissflogii	140221
98_T68_Alfred Burian	14	C18:4w3	1923.4	2.677	-35.03	A		T. Weis 2.1	algae	diatom	T	-18.36094371		Thalassiosira	weissflogii	140221
98_T68_Alfred Burian	15	C20:5w3	2269.9	9.765	-32.632	A		T. Weis 2.1	algae	diatom	T	-18.36094371		Thalassiosira	weissflogii	140221
98_T68_Alfred Burian	16	C22:6w3	2546	1.07	-35.705	A		T. Weis 2.1	algae	diatom	T	-18.36094371		Thalassiosira	weissflogii	140221
116_T117_Alfred Burian	5	C14:0	753	1.406	-29.599	A		Daphnid Rhod 3.007mg	Chem_R	daphnia	T	-18.28088485		Daphnia_R	magna	140224
116_T117_Alfred Burian	6	C16:0	1077.4	5.328	-31.829	A		Daphnid Rhod 3.007mg	Chem_R	daphnia	T	-18.28088485		Daphnia_R	magna	140224
116_T117_Alfred Burian	7	C16:1w9/7	1164.3	1.274	-30.137	T	1	Daphnid Rhod 3.007mg	Chem_R	daphnia	T	-18.28088485		Daphnia_R	magna	140224
116_T117_Alfred Burian		C17:0	1254	0.4	-29.4	B		Daphnid Rhod 3.007mg	Chem_R	daphnia	T	-18.28088485		Daphnia_R	magna	140224
116_T117_Alfred Burian	8	C16:4w3	1442.9	2.908	-32.617	A		Daphnid Rhod 3.007mg	Chem_R	daphnia	T	-18.28088485		Daphnia_R	magna	140224
116_T117_Alfred Burian	9	C18:1w9c	1517.5	3.986	-32.672	E		Daphnid Rhod 3.007mg	Chem_R	daphnia	T	-18.28088485		Daphnia_R	magna	140224
116_T117_Alfred Burian	10	C18:1w7c	1534.5	3.858	-28.465	E		Daphnid Rhod 3.007mg	Chem_R	daphnia	T	-18.28088485		Daphnia_R	magna	140224
116_T117_Alfred Burian		C18:1w7c/9		7.844	-30.5	T	E	Daphnid Rhod 3.007mg	Chem_R	daphnia	T	-18.28088485		Daphnia_R	magna	140224
116_T117_Alfred Burian	11	C19:0	1628.7	1.063	-34.355	A		Daphnid Rhod 3.007mg	Chem_R	daphnia	T	-18.28088485		Daphnia_R	magna	140224
116_T117_Alfred Burian	12	C18:2w6c	1656.1	1.405	-35.116	A		Daphnid Rhod 3.007mg	Chem_R	daphnia	T	-18.28088485		Daphnia_R	magna	140224
116_T117_Alfred Burian	13	C18:3w3	1828.1	12.654	-33.226	A		Daphnid Rhod 3.007mg	Chem_R	daphnia	T	-18.28088485		Daphnia_R	magna	140224
116_T117_Alfred Burian	14	C18:4w3	1926.1	9.708	-36.291	A		Daphnid Rhod 3.007mg	Chem_R	daphnia	T	-18.28088485		Daphnia_R	magna	140224
116_T117_Alfred Burian	15	C21:0	1991.6	1.153	-39.494	A		Daphnid Rhod 3.007mg	Chem_R	daphnia	T	-18.28088485		Daphnia_R	magna	140224
116_T117_Alfred Burian		C20:4w3	2218	0.46	-37.25	B		Daphnid Rhod 3.007mg	Chem_R	daphnia	T	-18.28088485		Daphnia_R	magna	140224
116_T117_Alfred Burian	16	C20:5w3	2270.8	10.925	-35.93	A		Daphnid Rhod 3.007mg	Chem_R	daphnia	T	-18.28088485		Daphnia_R	magna	140224
120_M89_Alfred Burian	7	C16:0	1082.2	13.77	-26.899	F	E							Daphnia_R	magna	140224
120_M89_Alfred Burian		C16:1w13	1149	0.6	-29.66	F	A							Daphnia_R	magna	140224
120_M89_Alfred Burian	8	C16:1w9/7	1172.9	4.81	-28.492	F	A							Daphnia_R	magna	140224
120_M89_Alfred Burian	9	C16:2w6	1281.2	1.114	-29.899	F	A							Daphnia_R	magna	140224
120_M89_Alfred Burian	10	C16:4w3	1446.7	3.254	-32.235	F	A							Daphnia_R	magna	140224
120_M89_Alfred Burian	11	C18:1w9c	1518.6	39.01	-28.839	F	E							Daphnia_R	magna	140224
120_M89_Alfred Burian	12	C18:1w7c	1536.4	2.998	-22.613	F	E							Daphnia_R	magna	140224
120_M89_Alfred Burian	13	C19:0	1632.9	1.178	-42.385	F	A							Daphnia_R	magna	140224
120_M89_Alfred Burian	14	C18:2w6c	1660.5	7.878	-28.734	F	A							Daphnia_R	magna	140224
120_M89_Alfred Burian	15	C18:3w3	1836.3	46.588	-28.532	F	A							Daphnia_R	magna	140224
120_M89_Alfred Burian	16	C18:4w3	1927.4	8.412	-31.861	F	A							Daphnia_R	magna	140224
120_M89_Alfred Burian	17	C21:0	1992.2	1.55	-36.234	F	A							Daphnia_R	magna	140224
120_M89_Alfred Burian	18	C24:0	2388.7	6.795	-26.611	F	A							Daphnia_R	magna	140224
120_M89_Alfred Burian		C24:1w9	2428	0.8	-25.3	F	A							Daphnia_R	magna	140224
121_M90_Alfred Burian	5	C16:0	1079.1	10.025	-30.331	F	A							Daphnia_R	magna	140224
121_M90_Alfred Burian		C16:1w13	1148	0.6	-33.3	F	A							Daphnia_R	magna	140224
121_M90_Alfred Burian		C16:1w9/7	1165	0.6	-30.5	F	A							Daphnia_R	magna	140224
121_M90_Alfred Burian	6	C17:0	1255.9	2.52	-36.419	F	A							Daphnia_R	magna	140224
121_M90_Alfred Burian	7	C16:4w3	1444	2.772	-31.909	F	A							Daphnia_R	magna	140224
121_M90_Alfred Burian	8	C18:1w9c	1520.1	6.67	-33.033	F	E							Daphnia_R	magna	140224
121_M90_Alfred Burian	9	C18:1w7c	1535.7	4.878	-29.628	F	E							Daphnia_R	magna	140224
121_M90_Alfred Burian	10	C19:0	1658.4	5.488	-33.058	F	A							Daphnia_R	magna	140224
121_M90_Alfred Burian	11	C18:2w6c	1718.2	3.43	-33.603	F	A							Daphnia_R	magna	140224
121_M90_Alfred Burian	12	C18:3w3	1830.2	19.228	-33.817	F	A							Daphnia_R	magna	140224
121_M90_Alfred Burian		C20:1w9	1890	0.8	-39.8	F	A							Daphnia_R	magna	140224
106_T88_Alfred Burian	5	C16:0	1078.4	7.536	-31.355	F	A							Daphnia_R	magna	140224
106_T88_Alfred Burian		C16:1w13	1148	0.7	-33.22	F	A							Daphnia_R	magna	140224
106_T88_Alfred Burian		C16:1w9/7	1164	0.9	-31.2	F	B							Daphnia_R	magna	140224
106_T88_Alfred Burian		C16:2w6	1280	0.6	-35.8	F	A							Daphnia_R	magna	140224
106_T88_Alfred Burian	6	C16:4w3	1445.2	3.775	-31.514	F	A							Daphnia_R	magna	140224
106_T88_Alfred Burian	7	C18:1w9c	1514	8.49	-32.43	F	E							Daphnia_R	magna	140224
106_T88_Alfred Burian	8	C18:1w7c	1534.3	2.758	-30.149	F	E							Daphnia_R	magna	140224
106_T88_Alfred Burian	9	C19:0	1657.2	2.834	-35.151	F	A							Daphnia_R	magna	140224
106_T88_Alfred Burian	10	C18:2w6c	1718	3.219	-34.392	F	A							Daphnia_R	magna	140224
106_T88_Alfred Burian	11	C18:3w3	1830	19.114	-33.38	F	A							Daphnia_R	magna	140224
106_T88_Alfred Burian	12	C20:1w9	1890.2	1.343	-35.842	F	A							Daphnia_R	magna	140224
87_T69_Alfred Burian	5	C14:0	753	3.349	-25.44	A		E. Hux cal 1.1	algae	hapto	T	-10.20975844		Emiliana	huxleyi cal	140221
87_T69_Alfred Burian	7	C14:1	829.9	5.426	-23.684	A		E. Hux cal 1.1	algae	hapto	T	-10.20975844		Emiliana	huxleyi cal	140221
87_T69_Alfred Burian	9	C16:0	1075.9	2.692	-26.109	A		E. Hux cal 1.1	algae	hapto	T	-10.20975844		Emiliana	huxleyi cal	140221
87_T69_Alfred Burian	10	C16:1w9/7	1163.9	1.68	-25.594	T	1	E. Hux cal 1.1	algae	hapto	T	-10.20975844		Emiliana	huxleyi cal	140221
87_T69_Alfred Burian		C18:0	1439	0.58	-29.5	A		E. Hux cal 1.1	algae	hapto	T	-10.20975844		Emiliana	huxleyi cal	140221
87_T69_Alfred Burian	11	C18:1w9c	1516.1	2.183	-25.959	E		E. Hux cal 1.1	algae	hapto	T	-10.20975844		Emiliana	huxleyi cal	140221
87_T69_Alfred Burian	12	C18:1w7c	1533.6	4.391	-21.438	E		E. Hux cal 1.1	algae	hapto	T	-10.20975844		Emiliana	huxleyi cal	140221
87_T69_Alfred Burian		C18:1w7c/9		6.574	-22.98	T	E	E. Hux cal 1.1	algae	hapto	T	-10.20975844		Emiliana	huxleyi cal	140221
87_T69_Alfred Burian		C18:1w5	1587	0.44	-24.8	A		E. Hux cal 1.1	algae	hapto	T	-10.20975844		Emiliana	huxleyi cal	140221
87_T69_Alfred Burian	13	C19:0	1627.3	2.394	-35.734	A		E. Hux cal 1.1	algae	hapto	T	-10.20975844		Emiliana	huxleyi cal	140221
87_T69_Alfred Burian		C18:3w3	1822	0.7	-33.06	A		E. Hux cal 1.1	algae	hapto	T	-10.20975844		Emiliana	huxleyi cal	140221
87_T69_Alfred Burian	14	C18:4w3	1922.6	1.249	-29.201	A		E. Hux cal 1.1	algae	hapto	T	-10.20975844		Emiliana	huxleyi cal	140221
87_T69_Alfred Burian	15	C21:0	1992	3.64	-32.655	A		E. Hux cal 1.1	algae	hapto	T	-10.20975844		Emiliana	huxleyi cal	140221
87_T69_Alfred Burian		C18:5w3	2035	0.6	-32.1	A		E. Hux cal 1.1	algae	hapto	T	-10.20975844		Emiliana	huxleyi cal	140221
87_T69_Alfred Burian		C20:3w3+C20:4w6+C22:0	2137	0.3	-32.99	B		E. Hux cal 1.1	algae	hapto	T	-10.20975844		Emiliana	huxleyi cal	140221
87_T69_Alfred Burian		C20:5w3	2267	0.6	-31.7	A		E. Hux cal 1.1	algae	hapto	T	-10.20975844		Emiliana	huxleyi cal	140221
87_T69_Alfred Burian	16	C22:6w3	2546	1.541	-24.637	E		E. Hux cal 1.1	algae	hapto	T	-10.20975844		Emiliana	huxleyi cal	140221
100_T62_Alfred Burian	7	C16:0	1080.7	13.211	-25.939	E		Mono 1.1	algae	green	T	-16.15226246		Monoraphidium		140221
100_T62_Alfred Burian		C16:1w13	1148		-25.9	B		Mono 1.1	algae	green	T	-16.15226246		Monoraphidium		140221
100_T62_Alfred Burian	8	C16:1w9/7	1171.9	4.083	-27.775	T	1	Mono 1.1	algae	green	T	-16.15226246		Monoraphidium		140221
100_T62_Alfred Burian	9	C16:2w6	1280.3	1.027	-28.61	A		Mono 1.1	algae	green	T	-16.15226246		Monoraphidium		140221
100_T62_Alfred Burian	10	C16:4w3	1445.2	2.313	-31.144	A		Mono 1.1	algae	green	T	-16.15226246		Monoraphidium		140221
100_T62_Alfred Burian	11	C18:1w9c	1517.3	36.091	-27.533	E		Mono 1.1	algae	green	T	-16.15226246		Monoraphidium		140221
100_T62_Alfred Burian	12	C18:1w7c	1534.7	2.127	-23.015	E		Mono 1.1	algae	green	T	-16.15226246		Monoraphidium		140221
100_T62_Alfred Burian		C18:1w7c/9		38.218	-27.34	T	E	Mono 1.1	algae	green	T	-16.15226246		Monoraphidium		140221
100_T62_Alfred Burian	13	C19:0	1631	1.537	-37.135	A		Mono 1.1	algae	green	T	-16.15226246		Monoraphidium		140221
100_T62_Alfred Burian	14	C18:2w6c	1659	6.909	-27.905	A		Mono 1.1	algae	green	T	-16.15226246		Monoraphidium		140221
100_T62_Alfred Burian	15	C18:3w3	1834	39.842	-27.769	A		Mono 1.1	algae	green	T	-16.15226246		Monoraphidium		140221
100_T62_Alfred Burian	16	C18:4w3	1926.4	7.65	-30.77	A		Mono 1.1	algae	green	T	-16.15226246		Monoraphidium		140221
100_T62_Alfred Burian	17	C21:0	1991.6	2.126	-37.858	A		Mono 1.1	algae	green	T	-16.15226246		Monoraphidium		140221
100_T62_Alfred Burian	18	C24:0	2387.8	8.346	-26.598	A		Mono 1.1	algae	green	T	-16.15226246		Monoraphidium		140221
101_T59_Alfred Burian	8	C16:0	1080.1	13.335	-26.644	E		Sel second take 2	algae	green	T	-15.29683479		Selenastrum		140221
101_T59_Alfred Burian		C16:1w13	1148		-27.68	A		Sel second take 2	algae	green	T	-15.29683479		Selenastrum		140221
101_T59_Alfred Burian	9	C16:1w9/7	1170	1.236	-28.106	T	1	Sel second take 2	algae	green	T	-15.29683479		Selenastrum		140221
101_T59_Alfred Burian	10	C16:4w3	1443.6	1.501	-30.372	A		Sel second take 2	algae	green	T	-15.29683479		Selenastrum		140221
101_T59_Alfred Burian	11	C18:1w9c	1515.5	19.865	-27.5	E		Sel second take 2	algae	green	T	-15.29683479		Selenastrum		140221
101_T59_Alfred Burian	12	C18:1w7c	1521.5	9.445	-25.3	E		Sel second take 2	algae	green	T	-15.29683479		Selenastrum		140221
101_T59_Alfred Burian		C18:1w7c/9		29.31	-27.4	T	E	Sel second take 2	algae	green	T	-15.29683479		Selenastrum		140221
101_T59_Alfred Burian	13	C19:0	1630.8	3.141	-37.98	A		Sel second take 2	algae	green	T	-15.29683479		Selenastrum		140221
101_T59_Alfred Burian	14	C18:2w6c	1657.4	4.023	-29.932	A		Sel second take 2	algae	green	T	-15.29683479		Selenastrum		140221
101_T59_Alfred Burian	15	C18:3w3	1831.3	27.382	-28.219	A		Sel second take 2	algae	green	T	-15.29683479		Selenastrum		140221
101_T59_Alfred Burian	16	C18:4w3	1924.7	4.615	-31.797	A		Sel second take 2	algae	green	T	-15.29683479		Selenastrum		140221
101_T59_Alfred Burian	17	C21:0	1990.9	1.988	-38.462	A		Sel second take 2	algae	green	T	-15.29683479		Selenastrum		140221
107_T89_Alfred Burian	5	C14:0	753.2	1.94	-30.43	F	A							Daphnia_R	magna	140224
107_T89_Alfred Burian	6	C16:0	1081.4	15.395	-31.262	F	A							Daphnia_R	magna	140224
107_T89_Alfred Burian	7	C16:1w13	1149.1	1.348	-33.906	F	A							Daphnia_R	magna	140224
107_T89_Alfred Burian	8	C16:1w9/7	1165.6	1.721	-31.071	F	A							Daphnia_R	magna	140224
107_T89_Alfred Burian	9	C16:2w6	1280.5	1.184	-32.9	F	A							Daphnia_R	magna	140224
107_T89_Alfred Burian		C16:3w4	1343	0.7	-32.8	F	A							Daphnia_R	magna	140225
107_T89_Alfred Burian	10	C16:4w3	1446.3	7.757	-32.989	F	A							Daphnia_R	magna	140224
107_T89_Alfred Burian	11	C18:1w9c	1515.9	17.176	-32.79	F	E							Daphnia_R	magna	140224
107_T89_Alfred Burian	12	C18:1w7c	1536.8	5.542	-28.303	F	E							Daphnia_R	magna	140224
107_T89_Alfred Burian	14	C19:0	1659.5	5.716	-35.804	F	A							Daphnia_R	magna	140224
107_T89_Alfred Burian	15	C18:2w6c	1719.9	6.739	-35.084	F	A							Daphnia_R	magna	140224
107_T89_Alfred Burian	16	C18:3w3	1834.4	37.926	-32.646	F	A							Daphnia_R	magna	140224
107_T89_Alfred Burian	17	C20:1w9	1891.7	2.912	-36.559	F	A							Daphnia_R	magna	140224
107_T89_Alfred Burian	18	C21:0	1991.1	1.027	-39.449	F	A							Daphnia_R	magna	140224
108_T97_Alfred Burian	5	C14:0	757	22.417	-29.091	A		skel 3.4+3.5	algae	diatom	T	-16.6794928		Skeletonema	marinoi	140224
108_T97_Alfred Burian	9	C16:0	1079.1	7.133	-30.2	A		skel 3.4+3.5	algae	diatom	T	-16.6794928		Skeletonema	marinoi	140224
108_T97_Alfred Burian	10	C16:1w9/7	1168.5	10.997	-31.631	T	1	skel 3.4+3.5	algae	diatom	T	-16.6794928		Skeletonema	marinoi	140224
108_T97_Alfred Burian	11	C16:2w7	1268.2	2.391	-33.311	B		skel 3.4+3.5	algae	diatom	T	-16.6794928		Skeletonema	marinoi	140224
108_T97_Alfred Burian	12	C16:2w4	1323.4	2.022	-32.982	A		skel 3.4+3.5	algae	diatom	T	-16.6794928		Skeletonema	marinoi	140224
108_T97_Alfred Burian		C16:3w4	1359	0.7	-34.4	A		skel 3.4+3.5	algae	diatom	T	-16.6794928		Skeletonema	marinoi	140224
108_T97_Alfred Burian	13	C16:3w3	1425.2	0.903	-27.452	A		skel 3.4+3.5	algae	diatom	T	-16.6794928		Skeletonema	marinoi	140224
108_T97_Alfred Burian	14	C16:4w3	1441.9	1.271	-34.5	B		skel 3.4+3.5	algae	diatom	T	-16.6794928		Skeletonema	marinoi	140224
108_T97_Alfred Burian		C18:1w5	1570	0.9	-36.9	A		skel 3.4+3.5	algae	diatom	T	-16.6794928		Skeletonema	marinoi	140224
108_T97_Alfred Burian	15	C18:1w7c	1535.7	4.374	-29.704	A		skel 3.4+3.5	algae	diatom	T	-16.6794928		Skeletonema	marinoi	140224
108_T97_Alfred Burian	16	C19:0	1656.1	1.461	-36.441	E		skel 3.4+3.5	algae	diatom	T	-16.6794928		Skeletonema	marinoi	140224
108_T97_Alfred Burian	17	C18:2w6c	1667	1.236	-32.877	E		skel 3.4+3.5	algae	diatom	T	-16.6794928		Skeletonema	marinoi	140224
108_T97_Alfred Burian		C18:2w6c/C19		2.697	-34.9	T	E	skel 3.4+3.5	algae	diatom	T	-16.6794928		Skeletonema	marinoi	140224
108_T97_Alfred Burian		C18:4w3		0.9	-33.4	A		skel 3.4+3.5	algae	diatom	T	-16.6794928		Skeletonema	marinoi	140224
108_T97_Alfred Burian		C20:3w3+C20:4w6+C22:0		0.4	-30.3	A		skel 3.4+3.5	algae	diatom	T	-16.6794928		Skeletonema	marinoi	140224
108_T97_Alfred Burian	18	C20:5w3	2269.9	5.625	-32.909	A		skel 3.4+3.5	algae	diatom	T	-16.6794928		Skeletonema	marinoi	140224
108_T97_Alfred Burian	19	C22:6w3	2359.8	1.312	-31.098	A		skel 3.4+3.5	algae	diatom	T	-16.6794928		Skeletonema	marinoi	140224
128_T98_Alfred Burian	6	C16:0	1089.1	65.116	-30.5	E		Chlamy 3.1	algae	green	T	-20.48		Chlamydomonas	reinhardtii	140225
128_T98_Alfred Burian	7	C16:1w13	1150.8	1.756	-32.647	A		Chlamy 3.1	algae	green	T	-20.48		Chlamydomonas	reinhardtii	140225
128_T98_Alfred Burian	8	C16:1w9/7	1173.5	4.749	-31.945	T	1	Chlamy 3.1	algae	green	T	-20.48		Chlamydomonas	reinhardtii	140225
128_T98_Alfred Burian	9	C16:2w6	1281.6	2.661	-31.896	A		Chlamy 3.1	algae	green	T	-20.48		Chlamydomonas	reinhardtii	140225
128_T98_Alfred Burian	10	C16:3w4	1344.1	1.214	-38.162	B		Chlamy 3.1	algae	green	T	-20.48		Chlamydomonas	reinhardtii	140225
128_T98_Alfred Burian	11	C16:4w3	1448.2	12.528	-32.21	A		Chlamy 3.1	algae	green	T	-20.48		Chlamydomonas	reinhardtii	140225
128_T98_Alfred Burian	12	C18:1w9c	1519.4	41.145	-32.15	E		Chlamy 3.1	algae	green	T	-20.48		Chlamydomonas	reinhardtii	140225
128_T98_Alfred Burian	13	C18:1w7c	1540.7	13.961	-31.024	E		Chlamy 3.1	algae	green	T	-20.48		Chlamydomonas	reinhardtii	140225
128_T98_Alfred Burian	13	C18:1w7c/9	1540.7	55.106	-31.89	T	E	Chlamy 3.1	algae	green	T	-20.48		Chlamydomonas	reinhardtii	140225
128_T98_Alfred Burian	15	C19:0	1663.4	17.894	-31.837	A		Chlamy 3.1	algae	green	T	-20.48		Chlamydomonas	reinhardtii	140225
128_T98_Alfred Burian	16	C18:2w4	1722.4	14.712	-33.015	A		Chlamy 3.1	algae	green	T	-20.48		Chlamydomonas	reinhardtii	140225
128_T98_Alfred Burian	17	C18:3w3	1839.6	75.59	-31.309	A		Chlamy 3.1	algae	green	T	-20.48		Chlamydomonas	reinhardtii	140225
128_T98_Alfred Burian	18	C20:1w9	1893.5	5.572	-34.021	A		Chlamy 3.1	algae	green	T	-20.48		Chlamydomonas	reinhardtii	140225
132_M117_Alfred Burian	5	C14:0	753	1.187	-30.368	A		Daphnid Rhod 3.007mg	Chem_R	daphnia	M	-18.28088485		Daphnia_R	magna	140225
132_M117_Alfred Burian	6	C16:0	1079.7	10.588	-31.728	A		Daphnid Rhod 3.007mg	Chem_R	daphnia	M	-18.28088485		Daphnia_R	magna	140225
132_M117_Alfred Burian	7	C16:1w13	1148.5	0.992	-33.978	A		Daphnid Rhod 3.007mg	Chem_R	daphnia	M	-18.28088485		Daphnia_R	magna	140225
132_M117_Alfred Burian	8	C16:1w9/7	1165	1.528	-30.401	T	1	Daphnid Rhod 3.007mg	Chem_R	daphnia	M	-18.28088485		Daphnia_R	magna	140225
132_M117_Alfred Burian	9	C17:0	1258	6.143	-35.87	A		Daphnid Rhod 3.007mg	Chem_R	daphnia	M	-18.28088485		Daphnia_R	magna	140225
132_M117_Alfred Burian	10	C16:4w3	1445.7	4.312	-33.217	A		Daphnid Rhod 3.007mg	Chem_R	daphnia	M	-18.28088485		Daphnia_R	magna	140225
132_M117_Alfred Burian	11	C18:1w9c	1521.1	8.962	-32.573	E		Daphnid Rhod 3.007mg	Chem_R	daphnia	M	-18.28088485		Daphnia_R	magna	140225
132_M117_Alfred Burian	12	C18:1w7c	1537.6	8.696	-30.375	E		Daphnid Rhod 3.007mg	Chem_R	daphnia	M	-18.28088485		Daphnia_R	magna	140225
132_M117_Alfred Burian		C18:1w7c/9		17.658	-31.7	T	E	Daphnid Rhod 3.007mg	Chem_R	daphnia	M	-18.28088485		Daphnia_R	magna	140225
132_M117_Alfred Burian	13	C19:0	1633.1	5.542	-35.802	A		Daphnid Rhod 3.007mg	Chem_R	daphnia	M	-18.28088485		Daphnia_R	magna	140225
132_M117_Alfred Burian	14	C18:2w6c	1657.4	2.355	-27.328	A		Daphnid Rhod 3.007mg	Chem_R	daphnia	M	-18.28088485		Daphnia_R	magna	140225
132_M117_Alfred Burian	15	C18:3w3	1828.3	12.172	-33.781	A		Daphnid Rhod 3.007mg	Chem_R	daphnia	M	-18.28088485		Daphnia_R	magna	140225
132_M117_Alfred Burian	16	C18:4w3	1925.1	5.258	-36.078	A		Daphnid Rhod 3.007mg	Chem_R	daphnia	M	-18.28088485		Daphnia_R	magna	140225
132_M117_Alfred Burian		C20:3w3+C20:4w6+C22:0	2144	0.77	-36.2	B		Daphnid Rhod 3.007mg	Chem_R	daphnia	M	-18.28088485		Daphnia_R	magna	140225
132_M117_Alfred Burian		C20:4w3	2218	0.6	-39.9	A		Daphnid Rhod 3.007mg	Chem_R	daphnia	M	-18.28088485		Daphnia_R	magna	140225
132_M117_Alfred Burian	17	C20:5w3	2271.6	18.465	-34.41	A		Daphnid Rhod 3.007mg	Chem_R	daphnia	M	-18.28088485		Daphnia_R	magna	140225
133_M118_Alfred Burian	5	C14:0	753	1.054	-31.362	A		Daphnid Rhod 4.91mg	Chem_R	daphnia	M	-18.28088485		Daphnia_R	magna	140225
133_M118_Alfred Burian	6	C16:0	1080.1	11.966	-32.697	A		Daphnid Rhod 4.91mg	Chem_R	daphnia	M	-18.28088485		Daphnia_R	magna	140225
133_M118_Alfred Burian		C16:1w13	1148.5	0.62	-33.3	A		Daphnid Rhod 4.91mg	Chem_R	daphnia	M	-18.28088485		Daphnia_R	magna	140225
133_M118_Alfred Burian	7	C16:1w9/7	1165	1.182	-30.351	T	1	Daphnid Rhod 4.91mg	Chem_R	daphnia	M	-18.28088485		Daphnia_R	magna	140225
133_M118_Alfred Burian	8	C17:0	1257.6	5.031	-35.629	A		Daphnid Rhod 4.91mg	Chem_R	daphnia	M	-18.28088485		Daphnia_R	magna	140225
133_M118_Alfred Burian	9	C16:4w3	1446.1	4.604	-33.572	A		Daphnid Rhod 4.91mg	Chem_R	daphnia	M	-18.28088485		Daphnia_R	magna	140225
133_M118_Alfred Burian	10	C18:1w9c	1521.9	10.398	-34.138	E		Daphnid Rhod 4.91mg	Chem_R	daphnia	M	-18.28088485		Daphnia_R	magna	140225
133_M118_Alfred Burian	11	C18:1w7c	1538.2	9.038	-33.014	E		Daphnid Rhod 4.91mg	Chem_R	daphnia	M	-18.28088485		Daphnia_R	magna	140225
133_M118_Alfred Burian		C18:1w7c/9		18.076	-33.47	T	E	Daphnid Rhod 4.91mg	Chem_R	daphnia	M	-18.28088485		Daphnia_R	magna	140225
133_M118_Alfred Burian	12	C19:0	1633.1	5.01	-36.29	A		Daphnid Rhod 4.91mg	Chem_R	daphnia	M	-18.28088485		Daphnia_R	magna	140225
133_M118_Alfred Burian	13	C18:2w6c	1658	2.699	-34.365	A		Daphnid Rhod 4.91mg	Chem_R	daphnia	M	-18.28088485		Daphnia_R	magna	140225
133_M118_Alfred Burian	14	C18:3w3	1829.6	15.772	-33.488	A		Daphnid Rhod 4.91mg	Chem_R	daphnia	M	-18.28088485		Daphnia_R	magna	140225
133_M118_Alfred Burian	15	C18:4w3	1925.9	6.797	-36.469	A		Daphnid Rhod 4.91mg	Chem_R	daphnia	M	-18.28088485		Daphnia_R	magna	140225
133_M118_Alfred Burian		C20:3w3+C20:4w6+C22:0	2146	0.8	-37.5	B		Daphnid Rhod 4.91mg	Chem_R	daphnia	M	-18.28088485		Daphnia_R	magna	140225
133_M118_Alfred Burian	16	C20:4w3	2219.2	0.945	-38.311	A		Daphnid Rhod 4.91mg	Chem_R	daphnia	M	-18.28088485		Daphnia_R	magna	140225
133_M118_Alfred Burian	17	C20:5w3	2272.5	19.718	-34.966	A		Daphnid Rhod 4.91mg	Chem_R	daphnia	M	-18.28088485		Daphnia_R	magna	140225
134_M119_Alfred Burian	5	C14:0	753	1.101	-30.727	A		Daphnid Rhod 3.512mg	Chem_R	daphnia	M	-18.28088485		Daphnia_R	magna	140225
134_M119_Alfred Burian	6	C16:0	1080.1	11.456	-31.909	A		Daphnid Rhod 3.512mg	Chem_R	daphnia	M	-18.28088485		Daphnia_R	magna	140225
134_M119_Alfred Burian		C16:1w13	1148	0.6	-33.89	A		Daphnid Rhod 3.512mg	Chem_R	daphnia	M	-18.28088485		Daphnia_R	magna	140225
134_M119_Alfred Burian	7	C16:1w9/7	1165.2	1.277	-30.723	T	1	Daphnid Rhod 3.512mg	Chem_R	daphnia	M	-18.28088485		Daphnia_R	magna	140225
134_M119_Alfred Burian	8	C17:0	1258.6	7.026	-35.8	A		Daphnid Rhod 3.512mg	Chem_R	daphnia	M	-18.28088485		Daphnia_R	magna	140225
134_M119_Alfred Burian	9	C16:4w3	1446.1	4.365	-33.609	A		Daphnid Rhod 3.512mg	Chem_R	daphnia	M	-18.28088485		Daphnia_R	magna	140225
134_M119_Alfred Burian	10	C18:1w9c	1521.7	9.551	-33.576	E		Daphnid Rhod 3.512mg	Chem_R	daphnia	M	-18.28088485		Daphnia_R	magna	140225
134_M119_Alfred Burian	11	C18:1w7c	1538	8.523	-31.93	E		Daphnid Rhod 3.512mg	Chem_R	daphnia	M	-18.28088485		Daphnia_R	magna	140225
134_M119_Alfred Burian		C18:1w7c/9		18.074	-32.847	T	E	Daphnid Rhod 3.512mg	Chem_R	daphnia	M	-18.28088485		Daphnia_R	magna	140225
134_M119_Alfred Burian	12	C19:0	1633.5	5.69	-37.145	A		Daphnid Rhod 3.512mg	Chem_R	daphnia	M	-18.28088485		Daphnia_R	magna	140225
134_M119_Alfred Burian	13	C18:2w6c	1657.8	2.595	-32.4	A		Daphnid Rhod 3.512mg	Chem_R	daphnia	M	-18.28088485		Daphnia_R	magna	140225
134_M119_Alfred Burian	14	C18:3w3	1829	13.392	-32.245	A		Daphnid Rhod 3.512mg	Chem_R	daphnia	M	-18.28088485		Daphnia_R	magna	140225
134_M119_Alfred Burian	15	C18:4w3	1925.7	5.897	-34.243	A		Daphnid Rhod 3.512mg	Chem_R	daphnia	M	-18.28088485		Daphnia_R	magna	140225
134_M119_Alfred Burian		C20:3w3+C20:4w6+C22:0	2148	0.6	-32.8	B		Daphnid Rhod 3.512mg	Chem_R	daphnia	M	-18.28088485		Daphnia_R	magna	140225
134_M119_Alfred Burian		C20:4w3	2218	0.7	-35.4	A		Daphnid Rhod 3.512mg	Chem_R	daphnia	M	-18.28088485		Daphnia_R	magna	140225
134_M119_Alfred Burian	16	C20:5w3	2272	16.799	-34.546	A		Daphnid Rhod 3.512mg	Chem_R	daphnia	M	-18.28088485		Daphnia_R	magna	140225
110_T100_Alfred Burian	5	C14:0	754.1	4.27	-27.891	A		Rot. Chlam 1.2FA	Chem_C	Rotifer	T	-23.05640797		Brach_C	plicatilis	140225
110_T100_Alfred Burian	7	C16:0	1084.9	28.256	-27.943	A		Rot. Chlam 1.2FA	Chem_C	Rotifer	T	-23.05640797		Brach_C	plicatilis	140225
110_T100_Alfred Burian	8	C16:1w9/7	1167.7	5.595	-30.952	T	1	Rot. Chlam 1.2FA	Chem_C	Rotifer	T	-23.05640797		Brach_C	plicatilis	140225
110_T100_Alfred Burian		C17:0	1256	1	-31.8	A		Rot. Chlam 1.2FA	Chem_C	Rotifer	T	-23.05640797		Brach_C	plicatilis	140225
110_T100_Alfred Burian	9	C16:3w3	1404.1	2.192	-33.399	A		Rot. Chlam 1.2FA	Chem_C	Rotifer	T	-23.05640797		Brach_C	plicatilis	140225
110_T100_Alfred Burian	10	C16:4w3	1447.3	5.162	-30.672	A		Rot. Chlam 1.2FA	Chem_C	Rotifer	T	-23.05640797		Brach_C	plicatilis	140225
110_T100_Alfred Burian	11	C18:1w9t	1488.1	2.916	-32.864	A		Rot. Chlam 1.2FA	Chem_C	Rotifer	T	-23.05640797		Brach_C	plicatilis	140225
110_T100_Alfred Burian	12	C18:1w9c	1520.1	3.51	-31.126	E		Rot. Chlam 1.2FA	Chem_C	Rotifer	T	-23.05640797		Brach_C	plicatilis	140225
110_T100_Alfred Burian	13	C18:1w7c	1537.6	4.837	-28.295	E		Rot. Chlam 1.2FA	Chem_C	Rotifer	T	-23.05640797		Brach_C	plicatilis	140225
110_T100_Alfred Burian		C18:1w7c/9		8.347	-29.47	T	E	Rot. Chlam 1.2FA	Chem_C	Rotifer	T	-23.05640797		Brach_C	plicatilis	140225
110_T100_Alfred Burian	14	C18:1w5	1590.1	1.283	-33.9	B		Rot. Chlam 1.2FA	Chem_C	Rotifer	T	-23.05640797		Brach_C	plicatilis	140225
110_T100_Alfred Burian	15	?	1631.5	1.398	-36.054	D		Rot. Chlam 1.2FA	Chem_C	Rotifer	T	-23.05640797		Brach_C	plicatilis	140225
110_T100_Alfred Burian	16	C19:0	1641.3	3.347	-29.218	C		Rot. Chlam 1.2FA	Chem_C	Rotifer	T	-23.05640797		Brach_C	plicatilis	140225
110_T100_Alfred Burian	17	C18:2w6c	1660.7	7.987	-30.005	A		Rot. Chlam 1.2FA	Chem_C	Rotifer	T	-23.05640797		Brach_C	plicatilis	140225
110_T100_Alfred Burian	18	C18:2w4	1719.2	1.429	-28.537	B		Rot. Chlam 1.2FA	Chem_C	Rotifer	T	-23.05640797		Brach_C	plicatilis	140225
110_T100_Alfred Burian	19	C18:3w6	1755.6	2.718	-35.39	A		Rot. Chlam 1.2FA	Chem_C	Rotifer	T	-23.05640797		Brach_C	plicatilis	140225
110_T100_Alfred Burian	20	C18:3w3	1829.4	12.844	-30.783	A		Rot. Chlam 1.2FA	Chem_C	Rotifer	T	-23.05640797		Brach_C	plicatilis	140225
110_T100_Alfred Burian	21	?	1877.9	1.823	-34.038	A		Rot. Chlam 1.2FA	Chem_C	Rotifer	T	-23.05640797		Brach_C	plicatilis	140225
110_T100_Alfred Burian	22	C20:1w9	1890.6	1.862	-30.41	A		Rot. Chlam 1.2FA	Chem_C	Rotifer	T	-23.05640797		Brach_C	plicatilis	140225
110_T100_Alfred Burian	23	C18:4w3	1925.1	1.479	-31.4	A		Rot. Chlam 1.2FA	Chem_C	Rotifer	T	-23.05640797		Brach_C	plicatilis	140225
110_T100_Alfred Burian	24	C20:3w6	2094	4.562	-31.6	A		Rot. Chlam 1.2FA	Chem_C	Rotifer	T	-23.05640797		Brach_C	plicatilis	140225
110_T100_Alfred Burian	26	C20:4w3	2221.9	8.714	-30.74	A		Rot. Chlam 1.2FA	Chem_C	Rotifer	T	-23.05640797		Brach_C	plicatilis	140225
110_T100_Alfred Burian	27	C20:5w3	2270.2	2.718	-31.059	A		Rot. Chlam 1.2FA	Chem_C	Rotifer	T	-23.05640797		Brach_C	plicatilis	140225
110_T100_Alfred Burian	28	C22:5w3	2506.1	0.89	-28.784	A		Rot. Chlam 1.2FA	Chem_C	Rotifer	T	-23.05640797		Brach_C	plicatilis	140225
115_T111_Alfred Burian	7	C16:0	1080.7	10.982	-29.587	E		Chlamy.Chem. 2nd	Chem_C	green	T	-17.62011348		Chlamy_Chem_2nd	reinhardtii	140225
115_T111_Alfred Burian		C16:1w13	1148	0.8	-32.8	A		Chlamy.Chem. 2nd	Chem_C	green	T	-17.62011348		Chlamy_Chem_2nd	reinhardtii	140225
115_T111_Alfred Burian	8	C16:1w9/7	1171.4	1.72	-31.7	T	1	Chlamy.Chem. 2nd	Chem_C	green	T	-17.62011348		Chlamy_Chem_2nd	reinhardtii	140225
115_T111_Alfred Burian	9	C16:4w3	1444	3.668	-33.23	B		Chlamy.Chem. 2nd	Chem_C	green	T	-17.62011348		Chlamy_Chem_2nd	reinhardtii	140225
115_T111_Alfred Burian	10	C18:1w9c	1514	6.158	-30.871	E		Chlamy.Chem. 2nd	Chem_C	green	T	-17.62011348		Chlamy_Chem_2nd	reinhardtii	140225
115_T111_Alfred Burian	11	C18:1w7c	1534.9	2.734	-25.859	E		Chlamy.Chem. 2nd	Chem_C	green	T	-17.62011348		Chlamy_Chem_2nd	reinhardtii	140225
115_T111_Alfred Burian	11	C18:1w7c/9	1534.9	8.892	-29.47	T	E	Chlamy.Chem. 2nd	Chem_C	green	T	-17.62011348		Chlamy_Chem_2nd	reinhardtii	140225
115_T111_Alfred Burian	14	C18:2w4	1717.8	1.453	-33.562	A		Chlamy.Chem. 2nd	Chem_C	green	T	-17.62011348		Chlamy_Chem_2nd	reinhardtii	140225
115_T111_Alfred Burian	15	C18:3w3	1827.3	7.427	-33.554	A		Chlamy.Chem. 2nd	Chem_C	green	T	-17.62011348		Chlamy_Chem_2nd	reinhardtii	140225
115_T111_Alfred Burian		C20:1w9	1889	0.7	-33.1	A		Chlamy.Chem. 2nd	Chem_C	green	T	-17.62011348		Chlamy_Chem_2nd	reinhardtii	140225
115_T111_Alfred Burian	16	C21:0	1993.4	2.275	-37.182	A		Chlamy.Chem. 2nd	Chem_C	green	T	-17.62011348		Chlamy_Chem_2nd	reinhardtii	140225
117_T118_Alfred Burian	5	C14:0	754.1	3.967	-32.481	A		Daphnid Rhod 4.91mg	Chem_R	daphnia	T	-18.28088485		Daphnia_R	magna	140225
117_T118_Alfred Burian	7	C16:0	1081.8	15.691	-33.314	A		Daphnid Rhod 4.91mg	Chem_R	daphnia	T	-18.28088485		Daphnia_R	magna	140225
117_T118_Alfred Burian		C16:1w13	1149	0.7	-36.8	A		Daphnid Rhod 4.91mg	Chem_R	daphnia	T	-18.28088485		Daphnia_R	magna	140225
117_T118_Alfred Burian	8	C16:1w9/7	1166.2	2.792	-33.638	T	1	Daphnid Rhod 4.91mg	Chem_R	daphnia	T	-18.28088485		Daphnia_R	magna	140225
117_T118_Alfred Burian	9	C17:0	1256.5	1.29	-34.53	A		Daphnid Rhod 4.91mg	Chem_R	daphnia	T	-18.28088485		Daphnia_R	magna	140225
117_T118_Alfred Burian	10	C16:4w3	1447.5	8.123	-33.971	A		Daphnid Rhod 4.91mg	Chem_R	daphnia	T	-18.28088485		Daphnia_R	magna	140225
117_T118_Alfred Burian	11	C18:1w9c	1522.6	11.749	-34.96	E		Daphnid Rhod 4.91mg	Chem_R	daphnia	T	-18.28088485		Daphnia_R	magna	140225
117_T118_Alfred Burian	12	C18:1w7c	1539.3	9.182	-33.041	E		Daphnid Rhod 4.91mg	Chem_R	daphnia	T	-18.28088485		Daphnia_R	magna	140225
117_T118_Alfred Burian		C18:1w7c/9		20.931	-34.001	T	E	Daphnid Rhod 4.91mg	Chem_R	daphnia	T	-18.28088485		Daphnia_R	magna	140225
117_T118_Alfred Burian	13	C19:0	1634.6	1.803	-37.693	A		Daphnid Rhod 4.91mg	Chem_R	daphnia	T	-18.28088485		Daphnia_R	magna	140225
117_T118_Alfred Burian	14	C18:2w6c	1659.7	4.326	-35.04	B		Daphnid Rhod 4.91mg	Chem_R	daphnia	T	-18.28088485		Daphnia_R	magna	140225
117_T118_Alfred Burian	15	C18:3w3	1835.6	42.288	-33.8	A		Daphnid Rhod 4.91mg	Chem_R	daphnia	T	-18.28088485		Daphnia_R	magna	140225
117_T118_Alfred Burian	16	C18:4w3	1932.2	31.317	-36.094	A		Daphnid Rhod 4.91mg	Chem_R	daphnia	T	-18.28088485		Daphnia_R	magna	140225
117_T118_Alfred Burian	17	C21:0	1995.3	2.091	-39.752	A		Daphnid Rhod 4.91mg	Chem_R	daphnia	T	-18.28088485		Daphnia_R	magna	140225
117_T118_Alfred Burian		C20:3w3+C20:4w6+C22:0	2145	0.7	-31.7	A		Daphnid Rhod 4.91mg	Chem_R	daphnia	T	-18.28088485		Daphnia_R	magna	140225
117_T118_Alfred Burian	18	C20:4w3	2220.4	2.001	-33.518	A		Daphnid Rhod 4.91mg	Chem_R	daphnia	T	-18.28088485		Daphnia_R	magna	140225
117_T118_Alfred Burian	19	C20:5w3	2274.8	27.421	-37.877	A		Daphnid Rhod 4.91mg	Chem_R	daphnia	T	-18.28088485		Daphnia_R	magna	140225
118_T81_Alfred Burian	5	C14:0	753.4	3.205	-31.686	A		Rhod Extra B	Chem_R	crypto	T	-20		Rhodomonas_Chem	salina	140225
118_T81_Alfred Burian	8	C16:0	1079.1	8.825	-31.2	A		Rhod Extra B	Chem_R	crypto	T	-20		Rhodomonas_Chem	salina	140225
118_T81_Alfred Burian		C16:1w13			-32.6	B		Rhod Extra B	Chem_R	crypto	T	-20		Rhodomonas_Chem	salina	140225
118_T81_Alfred Burian		C16:1w9/7			-33.5	T	1	Rhod Extra B	Chem_R	crypto	T	-20		Rhodomonas_Chem	salina	140225
118_T81_Alfred Burian	9	C18:0	1443.1	1.427	-34.557	A		Rhod Extra B	Chem_R	crypto	T	-20		Rhodomonas_Chem	salina	140225
118_T81_Alfred Burian	10	C18:1w9c	1518.2	2.17	-30.304	A		Rhod Extra B	Chem_R	crypto	T	-20		Rhodomonas_Chem	salina	140225
118_T81_Alfred Burian	11	C18:1w7c	1534.9	2.947	-30.439	A		Rhod Extra B	Chem_R	crypto	T	-20		Rhodomonas_Chem	salina	140225
118_T81_Alfred Burian	12	C19:0	1631	1.757	-36.71	A		Rhod Extra B	Chem_R	crypto	T	-20		Rhodomonas_Chem	salina	140225
118_T81_Alfred Burian	13	C18:2w6c	1657.4	2.935	-32.911	A		Rhod Extra B	Chem_R	crypto	T	-20		Rhodomonas_Chem	salina	140225
118_T81_Alfred Burian	14	C18:3w3	1830.6	20.696	-33.394	A		Rhod Extra B	Chem_R	crypto	T	-20		Rhodomonas_Chem	salina	140225
118_T81_Alfred Burian	15	C18:4w3	1928.7	18.426	-36.685	A		Rhod Extra B	Chem_R	crypto	T	-20		Rhodomonas_Chem	salina	140225
118_T81_Alfred Burian	16	C21:0	1993	1.806	-38.286	A		Rhod Extra B	Chem_R	crypto	T	-20		Rhodomonas_Chem	salina	140225
118_T81_Alfred Burian		C23:0	2218	0.8	-38.09	A		Rhod Extra B	Chem_R	crypto	T	-20		Rhodomonas_Chem	salina	140225
118_T81_Alfred Burian	17	C20:5w3	2270.6	7.893	-37.195	A		Rhod Extra B	Chem_R	crypto	T	-20		Rhodomonas_Chem	salina	140225
118_T81_Alfred Burian	18	C22:6w3	2548.1	6.062	-37.592	A		Rhod Extra B	Chem_R	crypto	T	-20		Rhodomonas_Chem	salina	140225
119_M88_Alfred Burian	5	C16:0	1074.9	1.05	-28.998	F								Daphnia_R	magna	140225
119_M88_Alfred Burian		C17:0			-34.6	F								Daphnia_R	magna	140225
119_M88_Alfred Burian		C18:0			-30.5	F								Daphnia_R	magna	140225
119_M88_Alfred Burian	6	C18:1w9c	1515.3	1.204	-34.3	F								Daphnia_R	magna	140225
119_M88_Alfred Burian	7	C18:1w7c	1531.6	1.043	-25.6	F								Daphnia_R	magna	140225
119_M88_Alfred Burian		C18:2w6c			-36.3	F								Daphnia_R	magna	140225
119_M88_Alfred Burian	8	C18:3w3	1823.5	3.133	-32.493	F								Daphnia_R	magna	140225
122_T90_Alfred Burian	5	C14:0	753.7	4.679	-31.183	F	A							Daphnia_R	magna	140225
122_T90_Alfred Burian	8	C16:0	1086.2	34.217	-30.921	F	A							Daphnia_R	magna	140225
122_T90_Alfred Burian	9	C16:1w13	1151	3.145	-34.907	F	A							Daphnia_R	magna	140225
122_T90_Alfred Burian	10	C16:1w9/7	1167.5	4.191	-32.623	F	A							Daphnia_R	magna	140225
122_T90_Alfred Burian	11	C16:2w6	1281.6	2.604	-34.715	F	A							Daphnia_R	magna	140225
122_T90_Alfred Burian	12	C16:3w4	1344.3	1.704	-33.9	F	A							Daphnia_R	magna	140225
122_T90_Alfred Burian	13	C16:4w3	1449	16.408	-33.137	F	A							Daphnia_R	magna	140225
122_T90_Alfred Burian	14	C18:1w9c	1519.2	41.468	-32.939	F	E							Daphnia_R	magna	140225
122_T90_Alfred Burian	15	C18:1w7c	1541.6	12.561	-30.183	F	E							Daphnia_R	magna	140225
122_T90_Alfred Burian	17	C19:0	1663.6	12.874	-35.197	F	A							Daphnia_R	magna	140225
122_T90_Alfred Burian	18	C18:2w6c	1723.2	14.406	-36.045	F	A							Daphnia_R	magna	140225
122_T90_Alfred Burian	19	C18:3w3	1841.5	77.805	-33.41	F	A							Daphnia_R	magna	140225
122_T90_Alfred Burian	20	C20:1w9	1894.8	5.618	-36.755	F	A							Daphnia_R	magna	140225
122_T90_Alfred Burian	21	C21:0	1992	1.062	-42.47	F	A							Daphnia_R	magna	140225
123_M93_Alfred Burian	9	C16:0	1077.4	2.583	-33.777	F		Spirulina A3	algae	cyano	M	-16.11567872		Spirulina	magna	140225
123_M93_Alfred Burian	10	C16:1w9/7	1164.1	1.773	-35.2	F		Spirulina A3	algae	cyano	M	-16.11567872		Spirulina	magna	140225
123_M93_Alfred Burian	11	C17:0	1257.8	4.33	-35.38	F		Spirulina A3	algae	cyano	M	-16.11567872		Spirulina	magna	140225
123_M93_Alfred Burian	12	C16:4w3	1442.9	1.266	-33.178	F		Spirulina A3	algae	cyano	M	-16.11567872		Spirulina	magna	140225
123_M93_Alfred Burian	13	C18:1w7c	1534.3	1.146	-31.824	F		Spirulina A3	algae	cyano	M	-16.11567872		Spirulina	magna	140225
123_M93_Alfred Burian	14	C19:0	1635.2	7.933	-36.107	F		Spirulina A3	algae	cyano	M	-16.11567872		Spirulina	magna	140225
46_17M_Alfred Burian	5	C14:0	753	1.069	-35.846	A		Synechococc 1.1	algae	cyano	M	-29.42027135		Synechococcus		140226
46_17M_Alfred Burian	9	C16:0	1081.2	12.711	-37.6	B		Synechococc 1.1	algae	cyano	M	-29.42027135		Synechococcus		140226
46_17M_Alfred Burian	11	C16:1w9/7	1167.5	8.834	-39.054	T	1	Synechococc 1.1	algae	cyano	M	-29.42027135		Synechococcus		140226
46_17M_Alfred Burian	12	C17:0	1257.3	3.72	-35.01	A		Synechococc 1.1	algae	cyano	M	-29.42027135		Synechococcus		140226
46_17M_Alfred Burian		C18:0	1441	0.8	-40.8	A		Synechococc 1.1	algae	cyano	M	-29.42027135		Synechococcus		140226
46_17M_Alfred Burian	13	C18:1w9c	1517.1	0.855	-30.3	A		Synechococc 1.1	algae	cyano	M	-29.42027135		Synechococcus		140226
46_17M_Alfred Burian	14	C18:1w7c	1535.5	5.95	-38.01	A		Synechococc 1.1	algae	cyano	M	-29.42027135		Synechococcus		140226
46_17M_Alfred Burian	15	C19:0	1637.9	16.546	-35.632	A		Synechococc 1.1	algae	cyano	M	-29.42027135		Synechococcus		140226
46_17M_Alfred Burian		C18:4w3	1925	0.9	-36.7	F		Synechococc 1.1	algae	cyano	M	-29.42027135		Synechococcus		140226
46_17M_Alfred Burian	16	C21:0	2002.4	16.459	-31.948	A		Synechococc 1.1	algae	cyano	M	-29.42027135		Synechococcus		140226
46_17M_Alfred Burian	17	C23:0	2273.7	3.65	-35.237	A		Synechococc 1.1	algae	cyano	M	-29.42027135		Synechococcus		140226
47_M19_Alfred Burian	8	C16:0	1082	13.612	-33.037	A		Synechocyst 1.1	algae	cyano	M	-21.81591721		Synechocystis		140226
47_M19_Alfred Burian	9	C16:1w9/7	1167.1	3.01	-34.6	T	1	Synechocyst 1.1	algae	cyano	M	-21.81591721		Synechocystis		140226
47_M19_Alfred Burian	10	C17:0	1259.2	4.686	-34.831	A		Synechocyst 1.1	algae	cyano	M	-21.81591721		Synechocystis		140226
47_M19_Alfred Burian		C18:0	1444	0.8	-34	A		Synechocyst 1.1	algae	cyano	M	-21.81591721		Synechocystis		140226
47_M19_Alfred Burian	11	C19:0	1638.8	13.12	-35.054	A		Synechocyst 1.1	algae	cyano	M	-21.81591721		Synechocystis		140226
47_M19_Alfred Burian	12	C18:2w6c	1658	2.279	-29.802	D		Synechocyst 1.1	algae	cyano	M	-21.81591721		Synechocystis		140226
47_M19_Alfred Burian	13	C18:3w6	1755.4	3.671	-35.563	A		Synechocyst 1.1	algae	cyano	M	-21.81591721		Synechocystis		140226
47_M19_Alfred Burian	14	C18:3w3	1825.8	1.686	-35.559	A		Synechocyst 1.1	algae	cyano	M	-21.81591721		Synechocystis		140226
47_M19_Alfred Burian		C18:4w3	1924	0.8	-40.1	A		Synechocyst 1.1	algae	cyano	M	-21.81591721		Synechocystis		140226
47_M19_Alfred Burian	15	C21:0	2004.3	12.379	-32.705	A		Synechocyst 1.1	algae	cyano	M	-21.81591721		Synechocystis		140226
47_M19_Alfred Burian	17	C24:1w9	2430.7	2.692	-37.85	C		Synechocyst 1.1	algae	cyano	M	-21.81591721		Synechocystis		140226
48_M21_Alfred Burian	5	C16:0	1078.9	4.065	-32.674	A		Leptolyng 1.1	algae	cyano	M	-18.93673237		Leptolyngbia		140226
48_M21_Alfred Burian	6	C16:1w9/7	1165.4	2.262	-32.088	T	1	Leptolyng 1.1	algae	cyano	M	-18.93673237		Leptolyngbia		140226
48_M21_Alfred Burian	7	C17:0	1257.1	1.553	-33.257	A		Leptolyng 1.1	algae	cyano	M	-18.93673237		Leptolyngbia		140226
48_M21_Alfred Burian		C18:0	1443	0.6	-33.6	A		Leptolyng 1.1	algae	cyano	M	-18.93673237		Leptolyngbia		140226
48_M21_Alfred Burian	8	C18:1w9c	1518.6	1.825	-28.6	A		Leptolyng 1.1	algae	cyano	M	-18.93673237		Leptolyngbia		140226
48_M21_Alfred Burian	9	C18:1w7c	1534.9	1.435	-29.8	A		Leptolyng 1.1	algae	cyano	M	-18.93673237		Leptolyngbia		140226
48_M21_Alfred Burian	10	C19:0	1640.4	20.065	-32.591	D		Leptolyng 1.1	algae	cyano	M	-18.93673237		Leptolyngbia		140226
48_M21_Alfred Burian	11	C18:2w6c	1657.6	6.066	-24.542	F		Leptolyng 1.1	algae	cyano	M	-18.93673237		Leptolyngbia		140226
48_M21_Alfred Burian	12	C18:2w4	1726.1	27.471	-64.748	F		Leptolyng 1.1	algae	cyano	M	-18.93673237		Leptolyngbia		140226
48_M21_Alfred Burian	13	C18:3w3	1825.6	2.072	-33.232	A		Leptolyng 1.1	algae	cyano	M	-18.93673237		Leptolyngbia		140226
48_M21_Alfred Burian	14	C21:0	2004.7	15.409	-32.448	A		Leptolyng 1.1	algae	cyano	M	-18.93673237		Leptolyngbia		140226
48_M21_Alfred Burian	15	C23:0	2275.6	3.184	-34.148	A		Leptolyng 1.1	algae	cyano	M	-18.93673237		Leptolyngbia		140226
49_M14_Alfred Burian	7	C16:0	1079.1	3.415	-35.584	F								Not_iden_rmv	Not_iden_rmv	140226	Scenedsmus
49_M14_Alfred Burian	8	C16:1w9/7	1166.8	4.048	-34.61	F								Not_iden_rmv	Not_iden_rmv	140226	Scenedsmus
49_M14_Alfred Burian	9	C17:0	1258	1.801	-35.579	F								Not_iden_rmv	Not_iden_rmv	140226	Scenedsmus
49_M14_Alfred Burian	10	C19:0	1633.5	2.556	-34.204	F								Not_iden_rmv	Not_iden_rmv	140226	Scenedsmus
49_M14_Alfred Burian	11	C21:0	1999.1	2.473	-32.028	F								Not_iden_rmv	Not_iden_rmv	140226	Scenedsmus
53_M72_Alfred Burian	5	C14:0	754.3	1.996	-26.827	A		T. Weis 1.1	algae	diatom	M	-18.36094371		Thalassiosira	weissflogii	140226
53_M72_Alfred Burian	7	C16:0	1081.8	9.549	-27.2	A		T. Weis 1.1	algae	diatom	M	-18.36094371		Thalassiosira	weissflogii	140226
53_M72_Alfred Burian	8	C16:1w9/7	1168.3	7.688	-26.7	T	1	T. Weis 1.1	algae	diatom	M	-18.36094371		Thalassiosira	weissflogii	140226
53_M72_Alfred Burian	10	C17:0	1259.2	3.531	-36.521	A		T. Weis 1.1	algae	diatom	M	-18.36094371		Thalassiosira	weissflogii	140226
53_M72_Alfred Burian	11	C16:2w4	1324.4	2.781	-30.7	E		T. Weis 1.1	algae	diatom	M	-18.36094371		Thalassiosira	weissflogii	140226
53_M72_Alfred Burian	12	C16:3w4	1330.9	1.807	-24.974	E		T. Weis 1.1	algae	diatom	M	-18.36094371		Thalassiosira	weissflogii	140226
53_M72_Alfred Burian		C16:2w4/3w4		4.588	-29.6	T	E	T. Weis 1.1	algae	diatom	M	-18.36094371		Thalassiosira	weissflogii	140226
53_M72_Alfred Burian	13	C16:3w3	1426.4	1.943	-33.558	A		T. Weis 1.1	algae	diatom	M	-18.36094371		Thalassiosira	weissflogii	140226
53_M72_Alfred Burian		C16:4w3	1444	0.8	-35.3	A		T. Weis 1.1	algae	diatom	M	-18.36094371		Thalassiosira	weissflogii	140226
53_M72_Alfred Burian		C16:4w1	1470	0.8	-28.5	A		T. Weis 1.1	algae	diatom	M	-18.36094371		Thalassiosira	weissflogii	140226
53_M72_Alfred Burian	14	C18:1w9c	1518.8	1.683	-31.473	E		T. Weis 1.1	algae	diatom	M	-18.36094371		Thalassiosira	weissflogii	140226
53_M72_Alfred Burian	15	C18:1w7c	1538.2	6.95	-24.666	E		T. Weis 1.1	algae	diatom	M	-18.36094371		Thalassiosira	weissflogii	140226
53_M72_Alfred Burian		C18:1w7c/9		8.633	-25.9	T	E	T. Weis 1.1	algae	diatom	M	-18.36094371		Thalassiosira	weissflogii	140226
53_M72_Alfred Burian	16	C19:0	1640	14.193	-35.899	A		T. Weis 1.1	algae	diatom	M	-18.36094371		Thalassiosira	weissflogii	140226
53_M72_Alfred Burian	17	C18:2w6c	1658	1.268	-28.857	A		T. Weis 1.1	algae	diatom	M	-18.36094371		Thalassiosira	weissflogii	140226
53_M72_Alfred Burian	18	C18:3w3	1826	2.336	-36.382	A		T. Weis 1.1	algae	diatom	M	-18.36094371		Thalassiosira	weissflogii	140226
53_M72_Alfred Burian	19	C18:4w3	1924.3	0.937	-27.071	A		T. Weis 1.1	algae	diatom	M	-18.36094371		Thalassiosira	weissflogii	140226
53_M72_Alfred Burian	20	C20:5w3	2271.4	9.354	-30.73	A		T. Weis 1.1	algae	diatom	M	-18.36094371		Thalassiosira	weissflogii	140226
53_M72_Alfred Burian	21	C22:6w3	2547.5	1.366	-28.527	A		T. Weis 1.1	algae	diatom	M	-18.36094371		Thalassiosira	weissflogii	140226
136_Rhod3_Alfred Burian	5	C14:0	756.4	13.856	-40.036	A		Rhod Extra B	Chem_R	crypto	T	-28.35		Rhodomonas	salina	140226
136_Rhod3_Alfred Burian	8	C16:0	1086	32.299	-39.2	B		Rhod Extra B	Chem_R	crypto	T	-28.35		Rhodomonas	salina	140226
136_Rhod3_Alfred Burian	9	C16:1w9/7	1173.1	2.896	-42.6	T	1	Rhod Extra B	Chem_R	crypto	T	-28.35		Rhodomonas	salina	140226
136_Rhod3_Alfred Burian	10	C16:3w4	1365.4	1.453	-35.204	A		Rhod Extra B	Chem_R	crypto	T	-28.35		Rhodomonas	salina	140226
136_Rhod3_Alfred Burian	11	C18:0	1452.3	3.248	-38.214	A		Rhod Extra B	Chem_R	crypto	T	-28.35		Rhodomonas	salina	140226
136_Rhod3_Alfred Burian	12	C18:1w9c	1524.4	5.35	-39.925	E		Rhod Extra B	Chem_R	crypto	T	-28.35		Rhodomonas	salina	140226
136_Rhod3_Alfred Burian	13	C18:1w7c	1542	8.719	-38.503	E		Rhod Extra B	Chem_R	crypto	T	-28.35		Rhodomonas	salina	140226
136_Rhod3_Alfred Burian		C18:1w7c/9		14.069	-39.2	T	E	Rhod Extra B	Chem_R	crypto	T	-28.35		Rhodomonas	salina	140226
136_Rhod3_Alfred Burian	14	C19:0	1642.3	3.648	-35.994	A		Rhod Extra B	Chem_R	crypto	T	-28.35		Rhodomonas	salina	140226
136_Rhod3_Alfred Burian	15	C18:2w6c	1662.8	9.55	-38.359	B		Rhod Extra B	Chem_R	crypto	T	-28.35		Rhodomonas	salina	140226
136_Rhod3_Alfred Burian	16	C18:3w3	1840.9	67.1	-41.22	A		Rhod Extra B	Chem_R	crypto	T	-28.35		Rhodomonas	salina	140226
136_Rhod3_Alfred Burian	17	C18:4w3	1937.2	57.251	-42.307	A		Rhod Extra B	Chem_R	crypto	T	-28.35		Rhodomonas	salina	140226
136_Rhod3_Alfred Burian	18	C23:0	2220.6	1.47	-40.892	A		Rhod Extra B	Chem_R	crypto	T	-28.35		Rhodomonas	salina	140226
136_Rhod3_Alfred Burian	19	C20:5w3	2273.9	21.059	-42.249	A		Rhod Extra B	Chem_R	crypto	T	-28.35		Rhodomonas	salina	140226
136_Rhod3_Alfred Burian	20	C22:6w3	2551.3	15.762	-40.619	A		Rhod Extra B	Chem_R	crypto	T	-28.35		Rhodomonas	salina	140226
124_M95_Alfred Burian	6	C14:0	754.5	3.433	-27.311	A		Skel 2,5+2,3	algae	diatom	M	-16.6794928		Skeletonema	marinoi	140226
124_M95_Alfred Burian	8	C14:1	832.2	6.281	-25.373	A		Skel 2,5+2,3	algae	diatom	M	-16.6794928		Skeletonema	marinoi	140226
124_M95_Alfred Burian	11	C16:0	1080.1	4.942	-29.5	A		Skel 2,5+2,3	algae	diatom	M	-16.6794928		Skeletonema	marinoi	140226
124_M95_Alfred Burian	12	C16:1w13	1147.8	1.789	-32.509	C		Skel 2,5+2,3	algae	diatom	M	-16.6794928		Skeletonema	marinoi	140226
124_M95_Alfred Burian	13	C16:1w9/7	1167.7	8.506	-30.292	T	1	Skel 2,5+2,3	algae	diatom	M	-16.6794928		Skeletonema	marinoi	140226
124_M95_Alfred Burian	14	C17:0	1260.7	6.494	-35.855	A		Skel 2,5+2,3	algae	diatom	M	-16.6794928		Skeletonema	marinoi	140226
124_M95_Alfred Burian	15	C16:2w4	1324.2	1.733	-31.478	A		Skel 2,5+2,3	algae	diatom	M	-16.6794928		Skeletonema	marinoi	140226
124_M95_Alfred Burian	17	?	1412	1.571	-32.473	A		Skel 2,5+2,3	algae	diatom	M	-16.6794928		Skeletonema	marinoi	140226
124_M95_Alfred Burian		C16:3w3	1426	0.8	-32.6	A		Skel 2,5+2,3	algae	diatom	M	-16.6794928		Skeletonema	marinoi	140226
124_M95_Alfred Burian	18	C16:4w3	1446.1	1.437	-34.014	A		Skel 2,5+2,3	algae	diatom	M	-16.6794928		Skeletonema	marinoi	140226
124_M95_Alfred Burian		C16:4w1	1471	0.7	-31.7	A		Skel 2,5+2,3	algae	diatom	M	-16.6794928		Skeletonema	marinoi	140226
124_M95_Alfred Burian	19	C18:1w7c	1539.7	9.798	-29.064	A		Skel 2,5+2,3	algae	diatom	M	-16.6794928		Skeletonema	marinoi	140226
124_M95_Alfred Burian	20	C18:2w6c	1657.8	1.044	-35.009	A		Skel 2,5+2,3	algae	diatom	M	-16.6794928		Skeletonema	marinoi	140226
124_M95_Alfred Burian	21	C18:4w3	1924.3	1.171	-33.712	A		Skel 2,5+2,3	algae	diatom	M	-16.6794928		Skeletonema	marinoi	140226
124_M95_Alfred Burian	22	C20:5w3	2270.4	4.191	-32.595	A		Skel 2,5+2,3	algae	diatom	M	-16.6794928		Skeletonema	marinoi	140226
124_M95_Alfred Burian	23	C22:6w3	2548.1	0.981	-31.369	A		Skel 2,5+2,3	algae	diatom	M	-16.6794928		Skeletonema	marinoi	140226
125_T96_Alfred Burian	6	C14:0	754.1	2.204	-34.13	F	A	Nodularia 2.1	algae	cyano	T	-26.20996838		Nodularia	spumigena	140226
125_T96_Alfred Burian	8	C16:0	1082.2	13.938	-35.639	F	B	Nodularia 2.1	algae	cyano	T	-26.20996838		Nodularia	spumigena	140226
125_T96_Alfred Burian	9	C16:1w9/7	1167.1	4.76	-36.896	F	T	Nodularia 2.1	algae	cyano	T	-26.20996838		Nodularia	spumigena	140226
125_T96_Alfred Burian	10	C18:0	1442.7	1.157	-35.029	F	A	Nodularia 2.1	algae	cyano	T	-26.20996838		Nodularia	spumigena	140226
125_T96_Alfred Burian		C18:1w9c	1517	0.8	-37.3	F	E	Nodularia 2.1	algae	cyano	T	-26.20996838		Nodularia	spumigena	140226
125_T96_Alfred Burian		C18:1w7c	1533	0.7	-30.3	F	E	Nodularia 2.1	algae	cyano	T	-26.20996838		Nodularia	spumigena	140226
125_T96_Alfred Burian		C18:1w7c/9		1.5	-34.1	F	T	Nodularia 2.1	algae	cyano	T	-26.20996838		Nodularia	spumigena	140226
125_T96_Alfred Burian	11	C19:0	1631.2	2.172	-33.751	F	A	Nodularia 2.1	algae	cyano	T	-26.20996838		Nodularia	spumigena	140226
125_T96_Alfred Burian	12	C18:3w3	1824.8	2.312	-38.801	F	A	Nodularia 2.1	algae	cyano	T	-26.20996838		Nodularia	spumigena	140226
125_T96_Alfred Burian	13	C18:4w3	1924.7	4.591	-38.078	F	A	Nodularia 2.1	algae	cyano	T	-26.20996838		Nodularia	spumigena	140226
125_T96_Alfred Burian	14	C21:0	1994.9	1.797	-32.738	F	A	Nodularia 2.1	algae	cyano	T	-26.20996838		Nodularia	spumigena	140226
126_M96_Alfred Burian	5	C14:0	753	0.893	-33.417	C		Nodularia 2.1	algae	cyano	M	-26.20996838		Nodularia	spumigena	140226
126_M96_Alfred Burian	6	C16:0	1079.5	8.014	-37.616	A		Nodularia 2.1	algae	cyano	M	-26.20996838		Nodularia	spumigena	140226
126_M96_Alfred Burian	7	C16:1w9/7	1165.6	3.108	-35.758	T	1	Nodularia 2.1	algae	cyano	M	-26.20996838		Nodularia	spumigena	140226
126_M96_Alfred Burian	8	C17:0	1258.2	5.173	-35.8	A		Nodularia 2.1	algae	cyano	M	-26.20996838		Nodularia	spumigena	140226
126_M96_Alfred Burian		C18:0			-34.6	C		Nodularia 2.1	algae	cyano	M	-26.20996838		Nodularia	spumigena	140226
126_M96_Alfred Burian		C18:1w9c			-28.2	F		Nodularia 2.1	algae	cyano	M	-26.20996838		Nodularia	spumigena	140226
126_M96_Alfred Burian	9	C18:3w3	1824.4	2.727	-36.943	A		Nodularia 2.1	algae	cyano	M	-26.20996838		Nodularia	spumigena	140226
126_M96_Alfred Burian	10	C18:4w3	1923.8	3.824	-38.56	A		Nodularia 2.1	algae	cyano	M	-26.20996838		Nodularia	spumigena	140226
127_M97_Alfred Burian	6	C14:0	754.5	5.821	-28.41	A		skel 3.4+3.5	algae	diatom	M	-16.6794928		Skeletonema	marinoi	140226
127_M97_Alfred Burian	7	C14:1	831.8	7.6	-25.718	A		skel 3.4+3.5	algae	diatom	M	-16.6794928		Skeletonema	marinoi	140226
127_M97_Alfred Burian	10	C16:0	1079.1	3.39	-29.5	A		skel 3.4+3.5	algae	diatom	M	-16.6794928		Skeletonema	marinoi	140226
127_M97_Alfred Burian	11	C16:1w13	1147.4	2.842	-30.866	A		skel 3.4+3.5	algae	diatom	M	-16.6794928		Skeletonema	marinoi	140226
127_M97_Alfred Burian	12	C16:1w9/7	1167.3	6.967	-28.92	T	1	skel 3.4+3.5	algae	diatom	M	-16.6794928		Skeletonema	marinoi	140226
127_M97_Alfred Burian	13	C17:0	1259.9	6.391	-36.331	A		skel 3.4+3.5	algae	diatom	M	-16.6794928		Skeletonema	marinoi	140226
127_M97_Alfred Burian	14	C16:2w4	1323.8	1.8	-32.208	A		skel 3.4+3.5	algae	diatom	M	-16.6794928		Skeletonema	marinoi	140226
127_M97_Alfred Burian	15	C16:3w4	1360	3.085	-31.839	A		skel 3.4+3.5	algae	diatom	M	-16.6794928		Skeletonema	marinoi	140226
127_M97_Alfred Burian		C16:4w3	1443	0.99	-31.16	A		skel 3.4+3.5	algae	diatom	M	-16.6794928		Skeletonema	marinoi	140226
127_M97_Alfred Burian		C16:4w1	1469	0.7	-30.6	A		skel 3.4+3.5	algae	diatom	M	-16.6794928		Skeletonema	marinoi	140226
127_M97_Alfred Burian	18	C18:1w9c	1519.6	1.417	-31.905	E		skel 3.4+3.5	algae	diatom	M	-16.6794928		Skeletonema	marinoi	140226
127_M97_Alfred Burian	19	C18:1w7c	1538	8.435	-26.593	E		skel 3.4+3.5	algae	diatom	M	-16.6794928		Skeletonema	marinoi	140226
127_M97_Alfred Burian		C18:1w7c/9		9.852	-27.3	T	E	skel 3.4+3.5	algae	diatom	M	-16.6794928		Skeletonema	marinoi	140226
127_M97_Alfred Burian	20	C19:0	1634.6	6.893	-36.247	A		skel 3.4+3.5	algae	diatom	M	-16.6794928		Skeletonema	marinoi	140226
127_M97_Alfred Burian	21	C18:2w6c	1656.7	0.845	-34.968	A		skel 3.4+3.5	algae	diatom	M	-16.6794928		Skeletonema	marinoi	140226
127_M97_Alfred Burian	23	C18:4w3	1923.6	1.073	-34.313	A		skel 3.4+3.5	algae	diatom	M	-16.6794928		Skeletonema	marinoi	140226
127_M97_Alfred Burian	24	C20:5w3	2269.5	3.517	-31.236	A		skel 3.4+3.5	algae	diatom	M	-16.6794928		Skeletonema	marinoi	140226
127_M97_Alfred Burian	25	C22:6w3	2546.9	1.482	-27.586	A		skel 3.4+3.5	algae	diatom	M	-16.6794928		Skeletonema	marinoi	140226
129_M98_Alfred Burian	5	C16:0	1089.9	53.945	-30.428	A		Chlamy 3.1	algae	green	M	-20.48		Chlamydomonas	reinhardtii	140226
129_M98_Alfred Burian	6	C16:1w13	1151.8	1.021	-27.879	E		Chlamy 3.1	algae	green	M	-20.48		Chlamydomonas	reinhardtii	140226
129_M98_Alfred Burian	7	C16:1w9/7	1175.6	8.461	-30.642	T	1	Chlamy 3.1	algae	green	M	-20.48		Chlamydomonas	reinhardtii	140226
129_M98_Alfred Burian	8	C16:1w5	1217.6	1.143	-34.1	A		Chlamy 3.1	algae	green	M	-20.48		Chlamydomonas	reinhardtii	140226
129_M98_Alfred Burian	9	C17:0	1260.1	4.413	-36.314	A		Chlamy 3.1	algae	green	M	-20.48		Chlamydomonas	reinhardtii	140226
129_M98_Alfred Burian	10	C16:2w6	1282.4	1.229	-35.464	B		Chlamy 3.1	algae	green	M	-20.48		Chlamydomonas	reinhardtii	140226
129_M98_Alfred Burian	11	C16:4w3	1448	7.766	-33.67	A		Chlamy 3.1	algae	green	M	-20.48		Chlamydomonas	reinhardtii	140226
129_M98_Alfred Burian	12	C18:1w9c	1514.4	7.874	-33.411	E		Chlamy 3.1	algae	green	M	-20.48		Chlamydomonas	reinhardtii	140226
129_M98_Alfred Burian	13	C18:1w7c	1542.6	14.989	-29.929	E		Chlamy 3.1	algae	green	M	-20.48		Chlamydomonas	reinhardtii	140226
129_M98_Alfred Burian	13	C18:1w7c/9	1542.6	22.863	-31.1	T	1	Chlamy 3.1	algae	green	M	-20.48		Chlamydomonas	reinhardtii	140226
129_M98_Alfred Burian	14	C19:0	1664.3	14.841	-32.474	A		Chlamy 3.1	algae	green	M	-20.48		Chlamydomonas	reinhardtii	140226
129_M98_Alfred Burian	15	C18:2w4	1725.5	22.799	-33.223	A		Chlamy 3.1	algae	green	M	-20.48		Chlamydomonas	reinhardtii	140226
129_M98_Alfred Burian	16	C18:3w3	1834.8	34.085	-33.089	A		Chlamy 3.1	algae	green	M	-20.48		Chlamydomonas	reinhardtii	140226
129_M98_Alfred Burian	17	C20:1w9	1894.6	9.131	-35.461	A		Chlamy 3.1	algae	green	M	-20.48		Chlamydomonas	reinhardtii	140226
130_M99_Alfred Burian	6	C16:0	1085.5	31.053	-26.092	A		Monoraphidium 2.1	algae	green	T	-15.87446078		Monoraphidium		140226
130_M99_Alfred Burian	7	C16:1w13	1150.5	1.385	-27.369	A		Monoraphidium 2.1	algae	green	T	-15.87446078		Monoraphidium		140226
130_M99_Alfred Burian	8	C16:1w9/7	1177.5	18.71	-27.124	T	1	Monoraphidium 2.1	algae	green	T	-15.87446078		Monoraphidium		140226
130_M99_Alfred Burian	9	C17:0	1260.3	5.08	-36.228	A		Monoraphidium 2.1	algae	green	T	-15.87446078		Monoraphidium		140226
130_M99_Alfred Burian	10	C16:2w6	1282	1.051	-31.08	A		Monoraphidium 2.1	algae	green	T	-15.87446078		Monoraphidium		140226
130_M99_Alfred Burian	11	C16:4w3	1447.3	3.701	-30.96	A		Monoraphidium 2.1	algae	green	T	-15.87446078		Monoraphidium		140226
130_M99_Alfred Burian	12	C18:1w9c	1516.5	20.922	-26.87	E		Monoraphidium 2.1	algae	green	T	-15.87446078		Monoraphidium		140226
130_M99_Alfred Burian	14	C18:1w7c	1539.1	4.669	-24.485	E		Monoraphidium 2.1	algae	green	T	-15.87446078		Monoraphidium		140226
130_M99_Alfred Burian		C18:1w7c/9		25.591	-26.7	T	E	Monoraphidium 2.1	algae	green	T	-15.87446078		Monoraphidium		140226
130_M99_Alfred Burian	15	C18:2w6c	1662.6	13.125	-27.398	A		Monoraphidium 2.1	algae	green	T	-15.87446078		Monoraphidium		140226
130_M99_Alfred Burian	16	C18:3w6	1755.4	1.54	-29.341	A		Monoraphidium 2.1	algae	green	T	-15.87446078		Monoraphidium		140226
130_M99_Alfred Burian	17	C18:3w3	1837.5	54.354	-27.778	A		Monoraphidium 2.1	algae	green	T	-15.87446078		Monoraphidium		140226
130_M99_Alfred Burian	18	C18:4w3	1929.3	15.037	-30.596	A		Monoraphidium 2.1	algae	green	T	-15.87446078		Monoraphidium		140226
130_M99_Alfred Burian	19	C24:0	2391.8	9.658	-27.463	A		Monoraphidium 2.1	algae	green	T	-15.87446078		Monoraphidium		140226
131_T113_Alfred Burian	7	C16:0	1078.9	6.741	-31.2	A		Chlamy.Chem. 1st	Chem_C	green	T	-20.4114598		Chlamy_Chem_1st	reinhardtii	140226
131_T113_Alfred Burian		C16:1w13	1148	0.4	-30.1	C		Chlamy.Chem. 1st	Chem_C	green	T	-20.4114598		Chlamy_Chem_1st	reinhardtii	140226
131_T113_Alfred Burian	8	C16:4w3	1443.6	3.428	-32.7	A		Chlamy.Chem. 1st	Chem_C	green	T	-20.4114598		Chlamy_Chem_1st	reinhardtii	140226
131_T113_Alfred Burian	9	C18:1w9c	1512.7	3.719	-30.979	A		Chlamy.Chem. 1st	Chem_C	green	T	-20.4114598		Chlamy_Chem_1st	reinhardtii	140226
131_T113_Alfred Burian	10	C18:1w7c	1534.1	1.713	-26.527	A		Chlamy.Chem. 1st	Chem_C	green	T	-20.4114598		Chlamy_Chem_1st	reinhardtii	140226
131_T113_Alfred Burian	11	C19:0	1631.5	3.764	-35.081	A		Chlamy.Chem. 1st	Chem_C	green	T	-20.4114598		Chlamy_Chem_1st	reinhardtii	140226
131_T113_Alfred Burian	12	C18:2w6c	1656.3	1.096	-32.2	A		Chlamy.Chem. 1st	Chem_C	green	T	-20.4114598		Chlamy_Chem_1st	reinhardtii	140226
131_T113_Alfred Burian	13	C18:2w4	1717.1	1.388	-33.161	A		Chlamy.Chem. 1st	Chem_C	green	T	-20.4114598		Chlamy_Chem_1st	reinhardtii	140226
131_T113_Alfred Burian	14	C18:3w3	1825.8	5.51	-32.353	A		Chlamy.Chem. 1st	Chem_C	green	T	-20.4114598		Chlamy_Chem_1st	reinhardtii	140226
131_T113_Alfred Burian		C20:1w9	1889	0.5	-36.7	C		Chlamy.Chem. 1st	Chem_C	green	T	-20.4114598		Chlamy_Chem_1st	reinhardtii	140226
131_T113_Alfred Burian	15	C21:0	1994.7	2.848	-33.631	A		Chlamy.Chem. 1st	Chem_C	green	T	-20.4114598		Chlamy_Chem_1st	reinhardtii	140226
48_21M_replicate MM Alfred Burian	5	C16:0	1078.6	2.613	-31.917	F		Leptolyng 1.1	algae	cyano	M	-18.93673237		Leptolyngbia		140227
48_21M_replicate MM Alfred Burian		C17:0	1257		-34.03	F		Leptolyng 1.1	algae	cyano	M	-18.93673237		Leptolyngbia		140227
48_21M_replicate MM Alfred Burian	6	C18:1w9c	1518.8	0.985	-26.03	F		Leptolyng 1.1	algae	cyano	M	-18.93673237		Leptolyngbia		140227
48_21M_replicate MM Alfred Burian	7	C19:0	1638.6	11.866	-35.447	F		Leptolyng 1.1	algae	cyano	M	-18.93673237		Leptolyngbia		140227
48_21M_replicate MM Alfred Burian		C18:2w6c	1658		-31.7	F		Leptolyng 1.1	algae	cyano	M	-18.93673237		Leptolyngbia		140227
48_21M_replicate MM Alfred Burian	8	C18:3w3	1826.2	1.471	-34.629	F		Leptolyng 1.1	algae	cyano	M	-18.93673237		Leptolyngbia		140227
48_21M_replicate MM Alfred Burian	9	C21:0	2003.1	11.23	-32.07	F		Leptolyng 1.1	algae	cyano	M	-18.93673237		Leptolyngbia		140227
48_21M_replicate MM Alfred Burian	10	C23:0	2275	2.343	-33.258	F		Leptolyng 1.1	algae	cyano	M	-18.93673237		Leptolyngbia		140227
53_M72_replicateMM Alfred Burian	5	C14:0	753	1.151	-26.784	F		T. Weis 1.1	algae	diatom	M	-18.36094371		Thalassiosira	weissflogii	140227
53_M72_replicateMM Alfred Burian	6	C16:0	1078.6	5.601	-27.4	F		T. Weis 1.1	algae	diatom	M	-18.36094371		Thalassiosira	weissflogii	140227
53_M72_replicateMM Alfred Burian	7	C16:1w9/7	1165.6	4.706	-26.316	F		T. Weis 1.1	algae	diatom	M	-18.36094371		Thalassiosira	weissflogii	140227
53_M72_replicateMM Alfred Burian		C16:1w5	1188	0.7	-23.2	F		T. Weis 1.1	algae	diatom	M	-18.36094371		Thalassiosira	weissflogii	140227
53_M72_replicateMM Alfred Burian	8	C17:0	1256.5	2.143	-35.091	F		T. Weis 1.1	algae	diatom	M	-18.36094371		Thalassiosira	weissflogii	140227
53_M72_replicateMM Alfred Burian	9	C16:2w4	1322.6	1.768	-28.235	F		T. Weis 1.1	algae	diatom	M	-18.36094371		Thalassiosira	weissflogii	140227
53_M72_replicateMM Alfred Burian	10	C16:3w4	1328.6	1.113	-24.104	F		T. Weis 1.1	algae	diatom	M	-18.36094371		Thalassiosira	weissflogii	140227
53_M72_replicateMM Alfred Burian	11	C16:3w3	1424.8	1.219	-29.757	F		T. Weis 1.1	algae	diatom	M	-18.36094371		Thalassiosira	weissflogii	140227
53_M72_replicateMM Alfred Burian		C16:4w1	1467	0.5	-29.1	F		T. Weis 1.1	algae	diatom	M	-18.36094371		Thalassiosira	weissflogii	140227
53_M72_replicateMM Alfred Burian		C18:1w9c		1.1	-31.02	F		T. Weis 1.1	algae	diatom	M	-18.36094371		Thalassiosira	weissflogii	140227
53_M72_replicateMM Alfred Burian	12	C18:1w7c	1535.1	4.253	-26.3	F		T. Weis 1.1	algae	diatom	M	-18.36094371		Thalassiosira	weissflogii	140227
53_M72_replicateMM Alfred Burian	13	C19:0	1635	9.406	-35.496	F		T. Weis 1.1	algae	diatom	M	-18.36094371		Thalassiosira	weissflogii	140227
53_M72_replicateMM Alfred Burian		C18:2w6c	1655	0.6	-31.8	F		T. Weis 1.1	algae	diatom	M	-18.36094371		Thalassiosira	weissflogii	140227
53_M72_replicateMM Alfred Burian	14	C18:3w3	1823.7	1.573	-37.074	F		T. Weis 1.1	algae	diatom	M	-18.36094371		Thalassiosira	weissflogii	140227
53_M72_replicateMM Alfred Burian		C18:4w3			-34.7	F		T. Weis 1.1	algae	diatom	M	-18.36094371		Thalassiosira	weissflogii	140227
53_M72_replicateMM Alfred Burian	15	C20:5w3	2269.3	6.856	-31.231	F		T. Weis 1.1	algae	diatom	M	-18.36094371		Thalassiosira	weissflogii	140227
53_M72_replicateMM Alfred Burian	16	C22:6w3	2546.2	0.979	-32.276	F		T. Weis 1.1	algae	diatom	M	-18.36094371		Thalassiosira	weissflogii	140227
124_M95_replicate Alfred Burian	6	C14:0	753.7	1.921	-28.848	F		Skel 2,5+2,3	algae	diatom	M	-16.6794928		Skeletonema	marinoi	140227
124_M95_replicate Alfred Burian	8	C14:1	830.8	3.782	-25.062	F		Skel 2,5+2,3	algae	diatom	M	-16.6794928		Skeletonema	marinoi	140227
124_M95_replicate Alfred Burian	10	C16:0	1078.2	2.65	-30.01	F		Skel 2,5+2,3	algae	diatom	M	-16.6794928		Skeletonema	marinoi	140227
124_M95_replicate Alfred Burian	11	C16:1w13	1147	1.25	-31.059	F		Skel 2,5+2,3	algae	diatom	M	-16.6794928		Skeletonema	marinoi	140227
124_M95_replicate Alfred Burian	12	C16:1w9/7	1166	5.711	-29.341	F		Skel 2,5+2,3	algae	diatom	M	-16.6794928		Skeletonema	marinoi	140227
124_M95_replicate Alfred Burian	13	C17:0	1258.4	3.634	-37.643	F		Skel 2,5+2,3	algae	diatom	M	-16.6794928		Skeletonema	marinoi	140227
124_M95_replicate Alfred Burian	14	C16:2w4	1323	1.202	-30.95	F		Skel 2,5+2,3	algae	diatom	M	-16.6794928		Skeletonema	marinoi	140227
124_M95_replicate Alfred Burian		C16:3w4	1358	0.7	-29.7	F		Skel 2,5+2,3	algae	diatom	M	-16.6794928		Skeletonema	marinoi	140227
124_M95_replicate Alfred Burian		?	1411	0.9	-30.1	F		Skel 2,5+2,3	algae	diatom	M	-16.6794928		Skeletonema	marinoi	140227
124_M95_replicate Alfred Burian		C16:4w3	1443	1	-31.6	F		Skel 2,5+2,3	algae	diatom	M	-16.6794928		Skeletonema	marinoi	140227
124_M95_replicate Alfred Burian		C16:4w1	1468	0.6	-28.3	F		Skel 2,5+2,3	algae	diatom	M	-16.6794928		Skeletonema	marinoi	140227
124_M95_replicate Alfred Burian	15	C18:1w7c	1537	7.347	-28.1	F		Skel 2,5+2,3	algae	diatom	M	-16.6794928		Skeletonema	marinoi	140227
124_M95_replicate Alfred Burian		C18:2w6c	1656	0.6	-35.6	F		Skel 2,5+2,3	algae	diatom	M	-16.6794928		Skeletonema	marinoi	140227
124_M95_replicate Alfred Burian	16	C20:5w3	2269.3	3.252	-31.424	F		Skel 2,5+2,3	algae	diatom	M	-16.6794928		Skeletonema	marinoi	140227
124_M95_replicate Alfred Burian	17	C22:6w3	2547.1	0.898	-29.804	F		Skel 2,5+2,3	algae	diatom	M	-16.6794928		Skeletonema	marinoi	140227
111_T101_Alfred Burian	5	C14:0	755.5	9.211	-27.317	A		Rot. Chlam 2.3+2.4	Chem_C	Rotifer	T	-23.05640797		Brach_C	plicatilis	140227
111_T101_Alfred Burian	6	C14:1	831	2.668	-24.486	A		Rot. Chlam 2.3+2.4	Chem_C	Rotifer	T	-23.05640797		Brach_C	plicatilis	140227
111_T101_Alfred Burian	9	C16:0	1091	55.763	-28.801	B		Rot. Chlam 2.3+2.4	Chem_C	Rotifer	T	-23.05640797		Brach_C	plicatilis	140227
111_T101_Alfred Burian	10	C16:1w9/7	1171	11.521	-31.314	T	1	Rot. Chlam 2.3+2.4	Chem_C	Rotifer	T	-23.05640797		Brach_C	plicatilis	140227
111_T101_Alfred Burian	11	C17:0	1260.1	2.01	-31.999	A		Rot. Chlam 2.3+2.4	Chem_C	Rotifer	T	-23.05640797		Brach_C	plicatilis	140227
111_T101_Alfred Burian	12	C16:3w4	1356.8	1.805	-30.841	A		Rot. Chlam 2.3+2.4	Chem_C	Rotifer	T	-23.05640797		Brach_C	plicatilis	140227
111_T101_Alfred Burian	13	C16:3w3	1406.4	4.147	-33.391	A		Rot. Chlam 2.3+2.4	Chem_C	Rotifer	T	-23.05640797		Brach_C	plicatilis	140227
111_T101_Alfred Burian	14	C16:4w3	1455.7	11.153	-29.396	B		Rot. Chlam 2.3+2.4	Chem_C	Rotifer	T	-23.05640797		Brach_C	plicatilis	140227
111_T101_Alfred Burian	15	C18:1w9t	1492.5	5.648	-31.286	A		Rot. Chlam 2.3+2.4	Chem_C	Rotifer	T	-23.05640797		Brach_C	plicatilis	140227
111_T101_Alfred Burian	16	C18:1w9c	1514.2	2.19	-31.205	E		Rot. Chlam 2.3+2.4	Chem_C	Rotifer	T	-23.05640797		Brach_C	plicatilis	140227
111_T101_Alfred Burian	17	C18:1w7c	1524.7	4.336	-30.767	E		Rot. Chlam 2.3+2.4	Chem_C	Rotifer	T	-23.05640797		Brach_C	plicatilis	140227
111_T101_Alfred Burian		C18:1w7c/9		6.526	-30.8	T	E	Rot. Chlam 2.3+2.4	Chem_C	Rotifer	T	-23.05640797		Brach_C	plicatilis	140227
111_T101_Alfred Burian		?			-28.08	C		Rot. Chlam 2.3+2.4	Chem_C	Rotifer	T	-23.05640797		Brach_C	plicatilis	140227
111_T101_Alfred Burian	19	C18:1w5	1593	2.617	-32.609	A		Rot. Chlam 2.3+2.4	Chem_C	Rotifer	T	-23.05640797		Brach_C	plicatilis	140227
111_T101_Alfred Burian		C19:0		2.955	-31.6	C		Rot. Chlam 2.3+2.4	Chem_C	Rotifer	T	-23.05640797		Brach_C	plicatilis	140227
111_T101_Alfred Burian		C18:2w6c			-29.3	C		Rot. Chlam 2.3+2.4	Chem_C	Rotifer	T	-23.05640797		Brach_C	plicatilis	140227
111_T101_Alfred Burian	23	C18:2w4	1721.7	5.328	-29.4	B		Rot. Chlam 2.3+2.4	Chem_C	Rotifer	T	-23.05640797		Brach_C	plicatilis	140227
111_T101_Alfred Burian	24	C18:3w6	1757.9	5.504	-33.256	A		Rot. Chlam 2.3+2.4	Chem_C	Rotifer	T	-23.05640797		Brach_C	plicatilis	140227
111_T101_Alfred Burian	25	C18:3w3	1834.2	28.276	-28.897	A		Rot. Chlam 2.3+2.4	Chem_C	Rotifer	T	-23.05640797		Brach_C	plicatilis	140227
111_T101_Alfred Burian	26	C20:1w9	1883.7	4.285	-31.602	C		Rot. Chlam 2.3+2.4	Chem_C	Rotifer	T	-23.05640797		Brach_C	plicatilis	140227
111_T101_Alfred Burian	29	C18:4w3	1926.6	3.685	-28.41	B		Rot. Chlam 2.3+2.4	Chem_C	Rotifer	T	-23.05640797		Brach_C	plicatilis	140227
111_T101_Alfred Burian	31	C20:2	2019.4	1.115	-31.406	A		Rot. Chlam 2.3+2.4	Chem_C	Rotifer	T	-23.05640797		Brach_C	plicatilis	140227
111_T101_Alfred Burian	33	C20:3w6	2097.1	11.411	-29.781	D		Rot. Chlam 2.3+2.4	Chem_C	Rotifer	T	-23.05640797		Brach_C	plicatilis	140227
111_T101_Alfred Burian	35	C20:3w3+C20:4w6+C22:0	2148.5	9.824	-30.3	A		Rot. Chlam 2.3+2.4	Chem_C	Rotifer	T	-23.05640797		Brach_C	plicatilis	140227
111_T101_Alfred Burian	37	C22:1w9	2197.8	1.672	-30.034	B		Rot. Chlam 2.3+2.4	Chem_C	Rotifer	T	-23.05640797		Brach_C	plicatilis	140227
111_T101_Alfred Burian	38	C20:4w3	2225	23.832	-28.63	A		Rot. Chlam 2.3+2.4	Chem_C	Rotifer	T	-23.05640797		Brach_C	plicatilis	140227
111_T101_Alfred Burian	39	C20:5w3	2271.8	6.256	-30.557	A		Rot. Chlam 2.3+2.4	Chem_C	Rotifer	T	-23.05640797		Brach_C	plicatilis	140227
111_T101_Alfred Burian	43	C24:1w9	2430.9	0.884	-32.382	A		Rot. Chlam 2.3+2.4	Chem_C	Rotifer	T	-23.05640797		Brach_C	plicatilis	140227
111_T101_Alfred Burian	44	C22:5w6	2443.2	1.021	-27.045	A		Rot. Chlam 2.3+2.4	Chem_C	Rotifer	T	-23.05640797		Brach_C	plicatilis	140227
111_T101_Alfred Burian	45	C22:5w3	2507	2.127	-28.529	A		Rot. Chlam 2.3+2.4	Chem_C	Rotifer	T	-23.05640797		Brach_C	plicatilis	140227
111_T101_Alfred Burian	46	C22:6w3	2547.9	1.009	-31.526	A		Rot. Chlam 2.3+2.4	Chem_C	Rotifer	T	-23.05640797		Brach_C	plicatilis	140227
114_T106_Alfred Burian	5	C14:0	755.5	10.017	-28.844	B		Rot. Rhod 1.1 + 1.3	Chem_R	Rotifer	T	-19.99705703		Brach_R	plicatilis	140227
114_T106_Alfred Burian	6	C14:1	831	2.951	-27.618	A		Rot. Rhod 1.1 + 1.3	Chem_R	Rotifer	T	-19.99705703		Brach_R	plicatilis	140227
114_T106_Alfred Burian	8	C16:0	1084.7	24.123	-30.758	A		Rot. Rhod 1.1 + 1.3	Chem_R	Rotifer	T	-19.99705703		Brach_R	plicatilis	140227
114_T106_Alfred Burian	9	C16:1w9/7	1168.7	8.473	-31.978	T	1	Rot. Rhod 1.1 + 1.3	Chem_R	Rotifer	T	-19.99705703		Brach_R	plicatilis	140227
114_T106_Alfred Burian	10	C18:0	1451.3	7.268	-32.786	B		Rot. Rhod 1.1 + 1.3	Chem_R	Rotifer	T	-19.99705703		Brach_R	plicatilis	140227
114_T106_Alfred Burian	11	C18:1w9t	1490	3.134	-35.15	A		Rot. Rhod 1.1 + 1.3	Chem_R	Rotifer	T	-19.99705703		Brach_R	plicatilis	140227
114_T106_Alfred Burian	12	C18:1w9c	1522.6	4.344	-33.801	E		Rot. Rhod 1.1 + 1.3	Chem_R	Rotifer	T	-19.99705703		Brach_R	plicatilis	140227
114_T106_Alfred Burian	13	C18:1w7c	1541	9.989	-29.371	E		Rot. Rhod 1.1 + 1.3	Chem_R	Rotifer	T	-19.99705703		Brach_R	plicatilis	140227
114_T106_Alfred Burian		C18:1w7c/9		19.978	-31.02	T	E	Rot. Rhod 1.1 + 1.3	Chem_R	Rotifer	T	-19.99705703		Brach_R	plicatilis	140227
114_T106_Alfred Burian	14	C19:0	1636.1	2.916	-34.074	A		Rot. Rhod 1.1 + 1.3	Chem_R	Rotifer	T	-19.99705703		Brach_R	plicatilis	140227
114_T106_Alfred Burian	15	C18:2w6c	1661.3	7.198	-32.4	A		Rot. Rhod 1.1 + 1.3	Chem_R	Rotifer	T	-19.99705703		Brach_R	plicatilis	140227
114_T106_Alfred Burian	16	C18:3w3	1834.8	35.319	-31.59	A		Rot. Rhod 1.1 + 1.3	Chem_R	Rotifer	T	-19.99705703		Brach_R	plicatilis	140227
114_T106_Alfred Burian	18	C20:1w9	1894.6	2.225	-33.228	B		Rot. Rhod 1.1 + 1.3	Chem_R	Rotifer	T	-19.99705703		Brach_R	plicatilis	140227
114_T106_Alfred Burian	20	C18:4w3	1929.3	15.136	-32.2	A		Rot. Rhod 1.1 + 1.3	Chem_R	Rotifer	T	-19.99705703		Brach_R	plicatilis	140227
114_T106_Alfred Burian		C21:0	1998	0.8	-29.7	A		Rot. Rhod 1.1 + 1.3	Chem_R	Rotifer	T	-19.99705703		Brach_R	plicatilis	140227
114_T106_Alfred Burian	21	C20:3w3+C20:4w6+C22:0	2152.1	6.262	-31.964	A		Rot. Rhod 1.1 + 1.3	Chem_R	Rotifer	T	-19.99705703		Brach_R	plicatilis	140227
114_T106_Alfred Burian	22	C22:1w9	2198.5	0.992	-36.854	A		Rot. Rhod 1.1 + 1.3	Chem_R	Rotifer	T	-19.99705703		Brach_R	plicatilis	140227
114_T106_Alfred Burian	23	C20:4w3	2226.5	29.76	-32.202	A		Rot. Rhod 1.1 + 1.3	Chem_R	Rotifer	T	-19.99705703		Brach_R	plicatilis	140227
114_T106_Alfred Burian	24	C20:5w3	2275.2	25.187	-33.309	B		Rot. Rhod 1.1 + 1.3	Chem_R	Rotifer	T	-19.99705703		Brach_R	plicatilis	140227
114_T106_Alfred Burian	25	C22:2w6	2292.9	1.242	-30.985	D		Rot. Rhod 1.1 + 1.3	Chem_R	Rotifer	T	-19.99705703		Brach_R	plicatilis	140227
114_T106_Alfred Burian	28	C22:5w6	2442.6	1.633	-34.1	B		Rot. Rhod 1.1 + 1.3	Chem_R	Rotifer	T	-19.99705703		Brach_R	plicatilis	140227
114_T106_Alfred Burian	30	C22:5w3	2509	8.262	-33.33	A		Rot. Rhod 1.1 + 1.3	Chem_R	Rotifer	T	-19.99705703		Brach_R	plicatilis	140227
114_T106_Alfred Burian	31	C22:6w3	2551.7	18.844	-32.508	A		Rot. Rhod 1.1 + 1.3	Chem_R	Rotifer	T	-19.99705703		Brach_R	plicatilis	140227
126_M96_replicate MM Alfred Burian	5	C16:0	1079.3	5.203	-33.5	F		Nodularia 2.1	algae	cyano	M	-26.20996838		Nodularia	spumigena	140227
126_M96_replicate MM Alfred Burian	6	C16:1w9/7	1165.6	2.016	-34.99	F		Nodularia 2.1	algae	cyano	M	-26.20996838		Nodularia	spumigena	140227
126_M96_replicate MM Alfred Burian	7	C17:0	1258.2	3.371	-35.443	F		Nodularia 2.1	algae	cyano	M	-26.20996838		Nodularia	spumigena	140227
126_M96_replicate MM Alfred Burian		C18:0	1442	0.4	-33.4	F		Nodularia 2.1	algae	cyano	M	-26.20996838		Nodularia	spumigena	140227
126_M96_replicate MM Alfred Burian		C18:1w9c	1516	0.4	-37.3	F		Nodularia 2.1	algae	cyano	M	-26.20996838		Nodularia	spumigena	140227
126_M96_replicate MM Alfred Burian		C18:1w7c	1533	0.5	-32.5	F		Nodularia 2.1	algae	cyano	M	-26.20996838		Nodularia	spumigena	140227
126_M96_replicate MM Alfred Burian		C18:2w6c	1656	0.4	-39.01	F		Nodularia 2.1	algae	cyano	M	-26.20996838		Nodularia	spumigena	140227
126_M96_replicate MM Alfred Burian	8	C18:3w3	1824.6	1.733	-37.286	F		Nodularia 2.1	algae	cyano	M	-26.20996838		Nodularia	spumigena	140227
126_M96_replicate MM Alfred Burian	9	C18:4w3	1923.8	2.373	-38.319	F		Nodularia 2.1	algae	cyano	M	-26.20996838		Nodularia	spumigena	140227
127_M97_replicate MM Alfred Burian	5	C14:0	754.3	4.417	-28.047	F		skel 3.4+3.5	algae	diatom	M	-16.6794928		Skeletonema	marinoi	140227
127_M97_replicate MM Alfred Burian	6	C14:1	831.4	5.764	-25.315	F		skel 3.4+3.5	algae	diatom	M	-16.6794928		Skeletonema	marinoi	140227
127_M97_replicate MM Alfred Burian	9	C16:0	1078.4	2.633	-28.9	F		skel 3.4+3.5	algae	diatom	M	-16.6794928		Skeletonema	marinoi	140227
127_M97_replicate MM Alfred Burian	10	C16:1w13	1147	2.201	-28.878	F		skel 3.4+3.5	algae	diatom	M	-16.6794928		Skeletonema	marinoi	140227
127_M97_replicate MM Alfred Burian	11	C16:1w9/7	1166.6	5.355	-27.896	F		skel 3.4+3.5	algae	diatom	M	-16.6794928		Skeletonema	marinoi	140227
127_M97_replicate MM Alfred Burian	12	C17:0	1259.2	4.957	-35.503	F		skel 3.4+3.5	algae	diatom	M	-16.6794928		Skeletonema	marinoi	140227
127_M97_replicate MM Alfred Burian	13	C16:2w4	1323.4	1.42	-30.948	F		skel 3.4+3.5	algae	diatom	M	-16.6794928		Skeletonema	marinoi	140227
127_M97_replicate MM Alfred Burian	14	C16:3w4	1359.5	2.364	-30.4	F		skel 3.4+3.5	algae	diatom	M	-16.6794928		Skeletonema	marinoi	140227
127_M97_replicate MM Alfred Burian	15	?	1411.8	2.765	-31.79	F		skel 3.4+3.5	algae	diatom	M	-16.6794928		Skeletonema	marinoi	140227
127_M97_replicate MM Alfred Burian		C16:3w3	1425	0.8	-30.3	F		skel 3.4+3.5	algae	diatom	M	-16.6794928		Skeletonema	marinoi	140227
127_M97_replicate MM Alfred Burian		C16:4w3	1443	0.7	-30.2	F		skel 3.4+3.5	algae	diatom	M	-16.6794928		Skeletonema	marinoi	140227
127_M97_replicate MM Alfred Burian		C16:4w1	1468	0.63	-29.7	F		skel 3.4+3.5	algae	diatom	M	-16.6794928		Skeletonema	marinoi	140227
127_M97_replicate MM Alfred Burian		C18:1w9c	1518	1.1	-31.2	F		skel 3.4+3.5	algae	diatom	M	-16.6794928		Skeletonema	marinoi	140227
127_M97_replicate MM Alfred Burian	16	C18:1w7c	1537	6.104	-25.9	F		skel 3.4+3.5	algae	diatom	M	-16.6794928		Skeletonema	marinoi	140227
127_M97_replicate MM Alfred Burian	17	C19:0	1633.8	5.338	-35.183	F		skel 3.4+3.5	algae	diatom	M	-16.6794928		Skeletonema	marinoi	140227
127_M97_replicate MM Alfred Burian		C18:4w3	1923	0.9	-35.7	F		skel 3.4+3.5	algae	diatom	M	-16.6794928		Skeletonema	marinoi	140227
127_M97_replicate MM Alfred Burian	18	C20:5w3	2269.1	2.809	-30.576	F		skel 3.4+3.5	algae	diatom	M	-16.6794928		Skeletonema	marinoi	140227
127_M97_replicate MM Alfred Burian	19	C22:6w3	2546.7	0.934	-28.116	F		skel 3.4+3.5	algae	diatom	M	-16.6794928		Skeletonema	marinoi	140227
148_M107_Alfred Burian	7	C14:0	754.1	3.463	-29.497	A		Rot. Rhod 5.1 + 5.2	Chem_R	Rotifer	M	-20.28649416		Brach_R	plicatilis	140227
148_M107_Alfred Burian	9	C16:0	1081.6	13.279	-32.41	B		Rot. Rhod 5.1 + 5.2	Chem_R	Rotifer	M	-20.28649416		Brach_R	plicatilis	140227
148_M107_Alfred Burian	10	C16:1w9/7	1166	1.908	-29.9	T	1	Rot. Rhod 5.1 + 5.2	Chem_R	Rotifer	M	-20.28649416		Brach_R	plicatilis	140227
148_M107_Alfred Burian	11	C17:0	1258.4	4.294	-35.624	A		Rot. Rhod 5.1 + 5.2	Chem_R	Rotifer	M	-20.28649416		Brach_R	plicatilis	140227
148_M107_Alfred Burian	12	C16:3w4	1347.2	2.614	-34.803	A		Rot. Rhod 5.1 + 5.2	Chem_R	Rotifer	M	-20.28649416		Brach_R	plicatilis	140227
148_M107_Alfred Burian	13	C18:0	1445.7	2.988	-33.061	A		Rot. Rhod 5.1 + 5.2	Chem_R	Rotifer	M	-20.28649416		Brach_R	plicatilis	140227
148_M107_Alfred Burian	14	C18:1w9t	1487.9	4.409	-35.007	A		Rot. Rhod 5.1 + 5.2	Chem_R	Rotifer	M	-20.28649416		Brach_R	plicatilis	140227
148_M107_Alfred Burian	15	C18:1w7c	1535.5	1.992	-31.9	A		Rot. Rhod 5.1 + 5.2	Chem_R	Rotifer	M	-20.28649416		Brach_R	plicatilis	140227
148_M107_Alfred Burian	16	C19:0	1637.7	10.51	-35.335	A		Rot. Rhod 5.1 + 5.2	Chem_R	Rotifer	M	-20.28649416		Brach_R	plicatilis	140227
148_M107_Alfred Burian	17	C18:2w6c	1658.6	4.087	-32.538	B		Rot. Rhod 5.1 + 5.2	Chem_R	Rotifer	M	-20.28649416		Brach_R	plicatilis	140227
148_M107_Alfred Burian	18	C18:3w3	1829	13.657	-33.284	A		Rot. Rhod 5.1 + 5.2	Chem_R	Rotifer	M	-20.28649416		Brach_R	plicatilis	140227
148_M107_Alfred Burian	20	C20:1w9	1891.4	1.385	-34.824	B		Rot. Rhod 5.1 + 5.2	Chem_R	Rotifer	M	-20.28649416		Brach_R	plicatilis	140227
148_M107_Alfred Burian	22	C18:4w3	1924.7	2.769	-34.521	B		Rot. Rhod 5.1 + 5.2	Chem_R	Rotifer	M	-20.28649416		Brach_R	plicatilis	140227
148_M107_Alfred Burian	25	C20:4w3	2221.5	9.891	-33.5	A		Rot. Rhod 5.1 + 5.2	Chem_R	Rotifer	M	-20.28649416		Brach_R	plicatilis	140227
148_M107_Alfred Burian	26	C20:5w3	2270.8	7.358	-34.334	A		Rot. Rhod 5.1 + 5.2	Chem_R	Rotifer	M	-20.28649416		Brach_R	plicatilis	140227
148_M107_Alfred Burian	28	C24:0	2368.6	2.239	-33.244	B		Rot. Rhod 5.1 + 5.2	Chem_R	Rotifer	M	-20.28649416		Brach_R	plicatilis	140227
148_M107_Alfred Burian	29	C22:5w3	2506.7	4.32	-33.541	A		Rot. Rhod 5.1 + 5.2	Chem_R	Rotifer	M	-20.28649416		Brach_R	plicatilis	140227
148_M107_Alfred Burian	30	C22:6w3	2547.3	1.736	-34.893	A		Rot. Rhod 5.1 + 5.2	Chem_R	Rotifer	M	-20.28649416		Brach_R	plicatilis	140227
135_T120_Alfred Burian	8	C16:0	1082	12.404	-30.3	A		Chlamy.Chem. 1st	Chem_C	green	T	-20.06127514		Chlamy_Chem_1st	reinhardtii	140227
135_T120_Alfred Burian		C16:1w13	1149	0.6	-30.77	A		Chlamy.Chem. 1st	Chem_C	green	T	-20.06127514		Chlamy_Chem_1st	reinhardtii	140227
135_T120_Alfred Burian		C16:2w6	1280	0.27	-32.885	C		Chlamy.Chem. 1st	Chem_C	green	T	-20.06127514		Chlamy_Chem_1st	reinhardtii	140227
135_T120_Alfred Burian	9	C16:4w3	1446.9	6.364	-33.163	A		Chlamy.Chem. 1st	Chem_C	green	T	-20.06127514		Chlamy_Chem_1st	reinhardtii	140227
135_T120_Alfred Burian	10	C18:1w9c	1514	7.336	-32.567	E		Chlamy.Chem. 1st	Chem_C	green	T	-20.06127514		Chlamy_Chem_1st	reinhardtii	140227
135_T120_Alfred Burian	11	C18:1w7c	1536.4	3.362	-29.913	E		Chlamy.Chem. 1st	Chem_C	green	T	-20.06127514		Chlamy_Chem_1st	reinhardtii	140227
135_T120_Alfred Burian	11	C18:1w7c/9	1536.4	10.698	-31.7	T	E	Chlamy.Chem. 1st	Chem_C	green	T	-20.06127514		Chlamy_Chem_1st	reinhardtii	140227
135_T120_Alfred Burian	12	C19:0	1635.4	6.624	-35.97	A		Chlamy.Chem. 1st	Chem_C	green	T	-20.06127514		Chlamy_Chem_1st	reinhardtii	140227
135_T120_Alfred Burian	13	C18:2w6c	1658.4	2.741	-31.4	A		Chlamy.Chem. 1st	Chem_C	green	T	-20.06127514		Chlamy_Chem_1st	reinhardtii	140227
135_T120_Alfred Burian	14	C18:2w4	1718.8	3.239	-35.145	A		Chlamy.Chem. 1st	Chem_C	green	T	-20.06127514		Chlamy_Chem_1st	reinhardtii	140227
135_T120_Alfred Burian	15	C18:3w3	1828.8	11.735	-31.719	A		Chlamy.Chem. 1st	Chem_C	green	T	-20.06127514		Chlamy_Chem_1st	reinhardtii	140227
135_T120_Alfred Burian	16	C20:1w9	1890.4	1.285	-36.976	A		Chlamy.Chem. 1st	Chem_C	green	T	-20.06127514		Chlamy_Chem_1st	reinhardtii	140227
135_T120_Alfred Burian	17	C21:0	1998.7	5.883	-34.566	A		Chlamy.Chem. 1st	Chem_C	green	T	-20.06127514		Chlamy_Chem_1st	reinhardtii	140227
163_T119_Alfred Burian	5	C14:0	753.9	2.082	-29.881	A		Daphnid Rhod 3.512mg	Chem_R	daphnia	T	-18.28088485		Daphnia_R	magna	140303
163_T119_Alfred Burian	6	C16:0	1080.1	8.532	-32.226	A		Daphnid Rhod 3.512mg	Chem_R	daphnia	T	-18.28088485		Daphnia_R	magna	140303
163_T119_Alfred Burian		C16:1w13	1149	0.6	-30.7	A		Daphnid Rhod 3.512mg	Chem_R	daphnia	T	-18.28088485		Daphnia_R	magna	140303
163_T119_Alfred Burian	7	C16:1w9/7	1165.8	1.721	-29.7	T	1	Daphnid Rhod 3.512mg	Chem_R	daphnia	T	-18.28088485		Daphnia_R	magna	140303
163_T119_Alfred Burian		C17:0	1256	0.7	-32.9	A		Daphnid Rhod 3.512mg	Chem_R	daphnia	T	-18.28088485		Daphnia_R	magna	140303
163_T119_Alfred Burian	8	C16:4w3	1446.5	5.313	-32.641	A		Daphnid Rhod 3.512mg	Chem_R	daphnia	T	-18.28088485		Daphnia_R	magna	140303
163_T119_Alfred Burian	9	C18:1w9c	1520.9	7.105	-32.251	E		Daphnid Rhod 3.512mg	Chem_R	daphnia	T	-18.28088485		Daphnia_R	magna	140303
163_T119_Alfred Burian	10	C18:1w7c	1537.2	5.011	-28.905	E		Daphnid Rhod 3.512mg	Chem_R	daphnia	T	-18.28088485		Daphnia_R	magna	140303
163_T119_Alfred Burian		C18:1w7c/9		12.116	-30.8	T	E	Daphnid Rhod 3.512mg	Chem_R	daphnia	T	-18.28088485		Daphnia_R	magna	140303
163_T119_Alfred Burian	11	C19:0	1632.9	1.62	-32.752	A		Daphnid Rhod 3.512mg	Chem_R	daphnia	T	-18.28088485		Daphnia_R	magna	140303
163_T119_Alfred Burian	12	C18:2w6c	1658.8	4.614	-32.736	A		Daphnid Rhod 3.512mg	Chem_R	daphnia	T	-18.28088485		Daphnia_R	magna	140303
163_T119_Alfred Burian	13	C18:3w3	1831	22.11	-31.148	A		Daphnid Rhod 3.512mg	Chem_R	daphnia	T	-18.28088485		Daphnia_R	magna	140303
163_T119_Alfred Burian	14	C18:4w3	1928	16.223	-32.9	A		Daphnid Rhod 3.512mg	Chem_R	daphnia	T	-18.28088485		Daphnia_R	magna	140303
163_T119_Alfred Burian	15	C21:0	1995.1	1.586	-30.609	A		Daphnid Rhod 3.512mg	Chem_R	daphnia	T	-18.28088485		Daphnia_R	magna	140303
163_T119_Alfred Burian	16	C20:4w3	2219.4	0.977	-35.391	A		Daphnid Rhod 3.512mg	Chem_R	daphnia	T	-18.28088485		Daphnia_R	magna	140303
163_T119_Alfred Burian	17	C20:5w3	2271.8	15.379	-32.915	A		Daphnid Rhod 3.512mg	Chem_R	daphnia	T	-18.28088485		Daphnia_R	magna	140303
163_T119_Alfred Burian		C22:6w3	2546	0.7	-38.8	B		Daphnid Rhod 3.512mg	Chem_R	daphnia	T	-18.28088485		Daphnia_R	magna	140303
166_T109_Alfred Burian	5	C14:0	756	4.891	-31.642	A		Daph.Chlam (rep 2) 2,97	Chem_C	daphnia	T	-19.29505771		Daphnia_C	magna	140303
166_T109_Alfred Burian	8	C16:0	1092	43.501	-31.438	A		Daph.Chlam (rep 2) 2,97	Chem_C	daphnia	T	-19.29505771		Daphnia_C	magna	140303
166_T109_Alfred Burian	9	C16:1w13	1155.1	4.285	-32.988	A		Daph.Chlam (rep 2) 2,97	Chem_C	daphnia	T	-19.29505771		Daphnia_C	magna	140303
166_T109_Alfred Burian	10	C16:1w9/7	1171.7	5.659	-31.494	T	1	Daph.Chlam (rep 2) 2,97	Chem_C	daphnia	T	-19.29505771		Daphnia_C	magna	140303
166_T109_Alfred Burian	11	C17:0	1265.5	5.572	-35.3	A		Daph.Chlam (rep 2) 2,97	Chem_C	daphnia	T	-19.29505771		Daphnia_C	magna	140303
166_T109_Alfred Burian	12	C16:2w6	1285.3	2.65	-31.5	A		Daph.Chlam (rep 2) 2,97	Chem_C	daphnia	T	-19.29505771		Daphnia_C	magna	140303
166_T109_Alfred Burian	14	C16:4w3	1452.6	15.454	-32.171	E		Daph.Chlam (rep 2) 2,97	Chem_C	daphnia	T	-19.29505771		Daphnia_C	magna	140303
166_T109_Alfred Burian	15	C18:0	1463.4	7.794	-31.326	E		Daph.Chlam (rep 2) 2,97	Chem_C	daphnia	T	-19.29505771		Daphnia_C	magna	140303
166_T109_Alfred Burian		C16:4w3/C18:0		23.248	-32.04	T	E	Daph.Chlam (rep 2) 2,97	Chem_C	daphnia	T	-19.29505771		Daphnia_C	magna	140303
166_T109_Alfred Burian	16	C18:1w9c	1522.6	40.685	-31.344	E		Daph.Chlam (rep 2) 2,97	Chem_C	daphnia	T	-19.29505771		Daphnia_C	magna	140303
166_T109_Alfred Burian	17	C18:1w7c	1550.2	7.85	-26.54	E		Daph.Chlam (rep 2) 2,97	Chem_C	daphnia	T	-19.29505771		Daphnia_C	magna	140303
166_T109_Alfred Burian		C18:1w7c/9		48.535	-31.77	T	E	Daph.Chlam (rep 2) 2,97	Chem_C	daphnia	T	-19.29505771		Daphnia_C	magna	140303
166_T109_Alfred Burian	18	C19:0	1648.6	4.632	-37.29	E		Daph.Chlam (rep 2) 2,97	Chem_C	daphnia	T	-19.29505771		Daphnia_C	magna	140303
166_T109_Alfred Burian	19	C18:2w6c	1670.1	21.104	-31.57	E		Daph.Chlam (rep 2) 2,97	Chem_C	daphnia	T	-19.29505771		Daphnia_C	magna	140303
166_T109_Alfred Burian		C18:2w6c/C19		25.736	-32.7	T	E	Daph.Chlam (rep 2) 2,97	Chem_C	daphnia	T	-19.29505771		Daphnia_C	magna	140303
166_T109_Alfred Burian	20	C18:2w4	1729.1	23.896	-32.088	A		Daph.Chlam (rep 2) 2,97	Chem_C	daphnia	T	-19.29505771		Daphnia_C	magna	140303
166_T109_Alfred Burian	21	C18:3w3	1849.4	116.851	-31.197	A		Daph.Chlam (rep 2) 2,97	Chem_C	daphnia	T	-19.29505771		Daphnia_C	magna	140303
166_T109_Alfred Burian	22	C20:1w9	1900.2	9.766	-34.516	A		Daph.Chlam (rep 2) 2,97	Chem_C	daphnia	T	-19.29505771		Daphnia_C	magna	140303
166_T109_Alfred Burian	23	C21:0	2001.4	3.661	-36.737	A		Daph.Chlam (rep 2) 2,97	Chem_C	daphnia	T	-19.29505771		Daphnia_C	magna	140303
166_T109_Alfred Burian	24	C20:5w3	2272.2	2.58	-34.872	A		Daph.Chlam (rep 2) 2,97	Chem_C	daphnia	T	-19.29505771		Daphnia_C	magna	140303
168_T110_Alfred Burian	6	C14:0	756.2	8.832	-31.544	A		Daph.Chlam (rep 5) 3,96	Chem_C	daphnia	T	-19.29505771		Daphnia_C	magna	140303
168_T110_Alfred Burian	9	C16:0	1094.5	60.742	-31.415	A		Daph.Chlam (rep 5) 3,96	Chem_C	daphnia	T	-19.29505771		Daphnia_C	magna	140303
168_T110_Alfred Burian	10	C16:1w13	1155.8	4.937	-34.798	A		Daph.Chlam (rep 5) 3,96	Chem_C	daphnia	T	-19.29505771		Daphnia_C	magna	140303
168_T110_Alfred Burian	11	C16:1w9/7	1172.5	7.028	-32.29	T	1	Daph.Chlam (rep 5) 3,96	Chem_C	daphnia	T	-19.29505771		Daphnia_C	magna	140303
168_T110_Alfred Burian	12	C17:0	1265.7	7.002	-35.5	B		Daph.Chlam (rep 5) 3,96	Chem_C	daphnia	T	-19.29505771		Daphnia_C	magna	140303
168_T110_Alfred Burian	13	C16:2w6	1285.1	5.298	-32.891	A		Daph.Chlam (rep 5) 3,96	Chem_C	daphnia	T	-19.29505771		Daphnia_C	magna	140303
168_T110_Alfred Burian	15	C16:4w3	1453	19.49	-34.361	E		Daph.Chlam (rep 5) 3,96	Chem_C	daphnia	T	-19.29505771		Daphnia_C	magna	140303
168_T110_Alfred Burian	16	C18:0	1465.5	7.354	-29.213	E		Daph.Chlam (rep 5) 3,96	Chem_C	daphnia	T	-19.29505771		Daphnia_C	magna	140303
168_T110_Alfred Burian		C16:4w3/C18:0		26.844	-33.3	T	E	Daph.Chlam (rep 5) 3,96	Chem_C	daphnia	T	-19.29505771		Daphnia_C	magna	140303
168_T110_Alfred Burian	17	C18:1w9c	1524.2	60.829	-32.207	E		Daph.Chlam (rep 5) 3,96	Chem_C	daphnia	T	-19.29505771		Daphnia_C	magna	140303
168_T110_Alfred Burian	19	C18:1w7c	1551.8	19.037	-27.292	E		Daph.Chlam (rep 5) 3,96	Chem_C	daphnia	T	-19.29505771		Daphnia_C	magna	140303
168_T110_Alfred Burian		C18:1w7c/9		79.866	-31.5	T	E	Daph.Chlam (rep 5) 3,96	Chem_C	daphnia	T	-19.29505771		Daphnia_C	magna	140303
168_T110_Alfred Burian	20	C19:0	1650.5	7.109	-34.4	C		Daph.Chlam (rep 5) 3,96	Chem_C	daphnia	T	-19.29505771		Daphnia_C	magna	140303
168_T110_Alfred Burian	21	C18:2w6c	1671.6	25.409	-37.5	C		Daph.Chlam (rep 5) 3,96	Chem_C	daphnia	T	-19.29505771		Daphnia_C	magna	140303
168_T110_Alfred Burian	22	C18:2w4	1729.5	26.948	-32.608	A		Daph.Chlam (rep 5) 3,96	Chem_C	daphnia	T	-19.29505771		Daphnia_C	magna	140303
168_T110_Alfred Burian	23	C18:3w3	1852.2	139.469	-31.971	A		Daph.Chlam (rep 5) 3,96	Chem_C	daphnia	T	-19.29505771		Daphnia_C	magna	140303
168_T110_Alfred Burian	24	C20:1w9	1900.9	11.364	-35.2	A		Daph.Chlam (rep 5) 3,96	Chem_C	daphnia	T	-19.29505771		Daphnia_C	magna	140303
168_T110_Alfred Burian	25	C21:0	2000.5	3.779	-36.871	A		Daph.Chlam (rep 5) 3,96	Chem_C	daphnia	T	-19.29505771		Daphnia_C	magna	140303
168_T110_Alfred Burian	26	C20:5w3	2270.8	1.4	-37.824	A		Daph.Chlam (rep 5) 3,96	Chem_C	daphnia	T	-19.29505771		Daphnia_C	magna	140303
165_T108_Alfred Burian	5	C14:0	756	7.225	-31.877	A		Daph.Chlam (rep 1) 3,41	Chem_C	daphnia	T	-19.29505771		Daphnia_C	magna	140303
165_T108_Alfred Burian	6	C14:1	829.7	2.042	-30.822	A		Daph.Chlam (rep 1) 3,41	Chem_C	daphnia	T	-19.29505771		Daphnia_C	magna	140303
165_T108_Alfred Burian	8	C16:0	1093.3	44.33	-32.649	A		Daph.Chlam (rep 1) 3,41	Chem_C	daphnia	T	-19.29505771		Daphnia_C	magna	140303
165_T108_Alfred Burian	9	C16:1w13	1155.6	3.246	-35.5	C		Daph.Chlam (rep 1) 3,41	Chem_C	daphnia	T	-19.29505771		Daphnia_C	magna	140303
165_T108_Alfred Burian	10	C16:1w9/7	1172.1	3.83	-33.02	T	1	Daph.Chlam (rep 1) 3,41	Chem_C	daphnia	T	-19.29505771		Daphnia_C	magna	140303
165_T108_Alfred Burian	11	C17:0	1265.7	3.914	-37.7	E		Daph.Chlam (rep 1) 3,41	Chem_C	daphnia	T	-19.29505771		Daphnia_C	magna	140303
165_T108_Alfred Burian	12	C16:2w6	1284.9	2.466	-33.3	E		Daph.Chlam (rep 1) 3,41	Chem_C	daphnia	T	-19.29505771		Daphnia_C	magna	140303
165_T108_Alfred Burian		C16:2w6/C17		6.38	-36.2			Daph.Chlam (rep 1) 3,41	Chem_C	daphnia	T	-19.29505771		Daphnia_C	magna	140303
165_T108_Alfred Burian	13	C16:3w4	1346.6	1.514	-33.9	B		Daph.Chlam (rep 1) 3,41	Chem_C	daphnia	T	-19.29505771		Daphnia_C	magna	140303
165_T108_Alfred Burian	14	C16:4w3	1452.6	12.656	-36.114	E		Daph.Chlam (rep 1) 3,41	Chem_C	daphnia	T	-19.29505771		Daphnia_C	magna	140303
165_T108_Alfred Burian	15	C18:0	1463.6	7.446	-30.843	E		Daph.Chlam (rep 1) 3,41	Chem_C	daphnia	T	-19.29505771		Daphnia_C	magna	140303
165_T108_Alfred Burian		C16:4w3/C18:0		20.102	-34.78	T	E	Daph.Chlam (rep 1) 3,41	Chem_C	daphnia	T	-19.29505771		Daphnia_C	magna	140303
165_T108_Alfred Burian	16	C18:1w9c	1523.4	43.139	-33.982	E		Daph.Chlam (rep 1) 3,41	Chem_C	daphnia	T	-19.29505771		Daphnia_C	magna	140303
165_T108_Alfred Burian	18	C18:1w7c	1549.9	16.497	-26.834	E		Daph.Chlam (rep 1) 3,41	Chem_C	daphnia	T	-19.29505771		Daphnia_C	magna	140303
165_T108_Alfred Burian		C18:1w7c/9		59.636	-32.8	T	E	Daph.Chlam (rep 1) 3,41	Chem_C	daphnia	T	-19.29505771		Daphnia_C	magna	140303
165_T108_Alfred Burian	19	C19:0	1648.2	2.525	-36	C		Daph.Chlam (rep 1) 3,41	Chem_C	daphnia	T	-19.29505771		Daphnia_C	magna	140303
165_T108_Alfred Burian	20	C18:2w6c	1670.1	17.191	-33.9	C		Daph.Chlam (rep 1) 3,41	Chem_C	daphnia	T	-19.29505771		Daphnia_C	magna	140303
165_T108_Alfred Burian	21	C18:2w4	1728.6	21.285	-33.915	A		Daph.Chlam (rep 1) 3,41	Chem_C	daphnia	T	-19.29505771		Daphnia_C	magna	140303
165_T108_Alfred Burian	22	C18:3w3	1849.9	116.835	-32.725	A		Daph.Chlam (rep 1) 3,41	Chem_C	daphnia	T	-19.29505771		Daphnia_C	magna	140303
165_T108_Alfred Burian	23	C20:1w9	1899.6	9.463	-34.8	A		Daph.Chlam (rep 1) 3,41	Chem_C	daphnia	T	-19.29505771		Daphnia_C	magna	140303
165_T108_Alfred Burian	24	C21:0	2000.8	4.028	-37.928	A		Daph.Chlam (rep 1) 3,41	Chem_C	daphnia	T	-19.29505771		Daphnia_C	magna	140303
165_T108_Alfred Burian	25	C20:5w3	2270.8	1.163	-35.671	A		Daph.Chlam (rep 1) 3,41	Chem_C	daphnia	T	-19.29505771		Daphnia_C	magna	140303
167_M109_Alfred Burian	5	C16:0	1085.1	18.079	-30.784	A		Daph.Chlam (rep 2) 2,97	Chem_C	daphnia	M	-19.29505771		Daphnia_C	magna	140303
167_M109_Alfred Burian	6	C16:1w13	1151.2	1.027	-32.2	A		Daph.Chlam (rep 2) 2,97	Chem_C	daphnia	M	-19.29505771		Daphnia_C	magna	140303
167_M109_Alfred Burian		C16:1w9/7	1167	1.003	-29.22	T	1	Daph.Chlam (rep 2) 2,97	Chem_C	daphnia	M	-19.29505771		Daphnia_C	magna	140303
167_M109_Alfred Burian	7	C17:0	1261.7	4.616	-36.142	A		Daph.Chlam (rep 2) 2,97	Chem_C	daphnia	M	-19.29505771		Daphnia_C	magna	140303
167_M109_Alfred Burian	8	C18:0	1453.8	5.042	-32.717	A		Daph.Chlam (rep 2) 2,97	Chem_C	daphnia	M	-19.29505771		Daphnia_C	magna	140303
167_M109_Alfred Burian	9	C18:1w9c	1526.5	6.307	-34.282	E		Daph.Chlam (rep 2) 2,97	Chem_C	daphnia	M	-19.29505771		Daphnia_C	magna	140303
167_M109_Alfred Burian	10	C18:1w7c	1542.8	7.053	-30.291	E		Daph.Chlam (rep 2) 2,97	Chem_C	daphnia	M	-19.29505771		Daphnia_C	magna	140303
167_M109_Alfred Burian		C18:1w7c/9		13.36	-32.002	T	E	Daph.Chlam (rep 2) 2,97	Chem_C	daphnia	M	-19.29505771		Daphnia_C	magna	140303
167_M109_Alfred Burian	11	C19:0	1663.8	7.165	-34.568	A		Daph.Chlam (rep 2) 2,97	Chem_C	daphnia	M	-19.29505771		Daphnia_C	magna	140303
167_M109_Alfred Burian	12	C18:2w4	1722.4	5.24	-32.588	A		Daph.Chlam (rep 2) 2,97	Chem_C	daphnia	M	-19.29505771		Daphnia_C	magna	140303
167_M109_Alfred Burian	13	C18:3w3	1836.9	30.137	-33.624	A		Daph.Chlam (rep 2) 2,97	Chem_C	daphnia	M	-19.29505771		Daphnia_C	magna	140303
167_M109_Alfred Burian	14	C20:1w9	1893.1	1.589	-34.125	A		Daph.Chlam (rep 2) 2,97	Chem_C	daphnia	M	-19.29505771		Daphnia_C	magna	140303
167_M109_Alfred Burian	15	C20:5w3	2270.4	1.576	-36.638	A		Daph.Chlam (rep 2) 2,97	Chem_C	daphnia	M	-19.29505771		Daphnia_C	magna	140303
167_M109_Alfred Burian	16	C23:0	2430.5	1.985	-36.758	A		Daph.Chlam (rep 2) 2,97	Chem_C	daphnia	M	-19.29505771		Daphnia_C	magna	140303
169_M110_Alfred Burian	5	C14:0	754.5	1.075	-32.309	A		Daph.Chlam (rep 5) 3,96	Chem_C	daphnia	M	-19.29505771		Daphnia_C	magna	140303
169_M110_Alfred Burian	6	C16:0	1086.2	21.379	-30.952	A		Daph.Chlam (rep 5) 3,96	Chem_C	daphnia	M	-19.29505771		Daphnia_C	magna	140303
169_M110_Alfred Burian	7	C16:1w13	1151.6	1.126	-31.9	A		Daph.Chlam (rep 5) 3,96	Chem_C	daphnia	M	-19.29505771		Daphnia_C	magna	140303
169_M110_Alfred Burian		C16:1w9/7	1167	1.1	-28.7	T	1	Daph.Chlam (rep 5) 3,96	Chem_C	daphnia	M	-19.29505771		Daphnia_C	magna	140303
169_M110_Alfred Burian	8	C17:0	1261.5	4.33	-37.014	A		Daph.Chlam (rep 5) 3,96	Chem_C	daphnia	M	-19.29505771		Daphnia_C	magna	140303
169_M110_Alfred Burian	9	C18:0	1454.8	5.632	-33.4	B		Daph.Chlam (rep 5) 3,96	Chem_C	daphnia	M	-19.29505771		Daphnia_C	magna	140303
169_M110_Alfred Burian	10	C18:1w9c	1527.6	8.452	-32.674	E		Daph.Chlam (rep 5) 3,96	Chem_C	daphnia	M	-19.29505771		Daphnia_C	magna	140303
169_M110_Alfred Burian	11	C18:1w7c	1543.3	7.734	-26.848	E		Daph.Chlam (rep 5) 3,96	Chem_C	daphnia	M	-19.29505771		Daphnia_C	magna	140303
169_M110_Alfred Burian		C18:1w7c/9		16.186	-29.9	T	E	Daph.Chlam (rep 5) 3,96	Chem_C	daphnia	M	-19.29505771		Daphnia_C	magna	140303
169_M110_Alfred Burian	12	C19:0	1664.5	7.618	-36.001	B		Daph.Chlam (rep 5) 3,96	Chem_C	daphnia	M	-19.29505771		Daphnia_C	magna	140303
169_M110_Alfred Burian	13	C18:2w4	1722.6	6.098	-32.867	A		Daph.Chlam (rep 5) 3,96	Chem_C	daphnia	M	-19.29505771		Daphnia_C	magna	140303
169_M110_Alfred Burian	14	C18:3w3	1837.3	34.406	-33	A		Daph.Chlam (rep 5) 3,96	Chem_C	daphnia	M	-19.29505771		Daphnia_C	magna	140303
169_M110_Alfred Burian	15	C20:1w9	1893.3	1.878	-33.071	A		Daph.Chlam (rep 5) 3,96	Chem_C	daphnia	M	-19.29505771		Daphnia_C	magna	140303
169_M110_Alfred Burian	16	C21:0	1997	1.244	-37.561	A		Daph.Chlam (rep 5) 3,96	Chem_C	daphnia	M	-19.29505771		Daphnia_C	magna	140303
169_M110_Alfred Burian	17	C20:5w3	2269.9	1.172	-35.977	A		Daph.Chlam (rep 5) 3,96	Chem_C	daphnia	M	-19.29505771		Daphnia_C	magna	140303
169_M110_Alfred Burian	18	C23:0	2430.7	4.812	-38.448	A		Daph.Chlam (rep 5) 3,96	Chem_C	daphnia	M	-19.29505771		Daphnia_C	magna	140303
164_M108_Alfred Burian	5	C14:0	754.7	2.046	-31.807	A		Daph.Chlam (rep 1) 3,41	Chem_C	daphnia	M	-19.29505771		Daphnia_C	magna	140303
164_M108_Alfred Burian	6	C16:0	1085.5	18.783	-31.497	A		Daph.Chlam (rep 1) 3,41	Chem_C	daphnia	M	-19.29505771		Daphnia_C	magna	140303
164_M108_Alfred Burian	7	C16:1w13	1151.6	1.401	-32.6	A		Daph.Chlam (rep 1) 3,41	Chem_C	daphnia	M	-19.29505771		Daphnia_C	magna	140303
164_M108_Alfred Burian		C16:1w9/7	1167	0.8	-27.6	T	1	Daph.Chlam (rep 1) 3,41	Chem_C	daphnia	M	-19.29505771		Daphnia_C	magna	140303
164_M108_Alfred Burian	8	C17:0	1262.4	5.848	-37.186	A		Daph.Chlam (rep 1) 3,41	Chem_C	daphnia	M	-19.29505771		Daphnia_C	magna	140303
164_M108_Alfred Burian	9	C18:0	1454.4	6.172	-33.878	B		Daph.Chlam (rep 1) 3,41	Chem_C	daphnia	M	-19.29505771		Daphnia_C	magna	140303
164_M108_Alfred Burian	10	C18:1w9c	1526.7	7.437	-34.261	E		Daph.Chlam (rep 1) 3,41	Chem_C	daphnia	M	-19.29505771		Daphnia_C	magna	140303
164_M108_Alfred Burian	11	C18:1w7c	1542.6	6.843	-28.09	E		Daph.Chlam (rep 1) 3,41	Chem_C	daphnia	M	-19.29505771		Daphnia_C	magna	140303
164_M108_Alfred Burian		C18:1w7c/9		13.686	-31.29	T	E	Daph.Chlam (rep 1) 3,41	Chem_C	daphnia	M	-19.29505771		Daphnia_C	magna	140303
164_M108_Alfred Burian	12	C19:0	1663.4	19.396	-42.332	C		Daph.Chlam (rep 1) 3,41	Chem_C	daphnia	M	-19.29505771		Daphnia_C	magna	140303
164_M108_Alfred Burian	14	C18:2w4	1722	4.353	-53.246	D		Daph.Chlam (rep 1) 3,41	Chem_C	daphnia	M	-19.29505771		Daphnia_C	magna	140303
164_M108_Alfred Burian	15	C18:3w3	1836.1	28.826	-33.197	A		Daph.Chlam (rep 1) 3,41	Chem_C	daphnia	M	-19.29505771		Daphnia_C	magna	140303
164_M108_Alfred Burian	16	C20:1w9	1892.7	1.567	-35.047	A		Daph.Chlam (rep 1) 3,41	Chem_C	daphnia	M	-19.29505771		Daphnia_C	magna	140303
164_M108_Alfred Burian	17	C21:0	1998.5	2.489	-35.972	A		Daph.Chlam (rep 1) 3,41	Chem_C	daphnia	M	-19.29505771		Daphnia_C	magna	140303
164_M108_Alfred Burian	18	C20:5w3	2269.9	1.042	-35.136	A		Daph.Chlam (rep 1) 3,41	Chem_C	daphnia	M	-19.29505771		Daphnia_C	magna	140303
164_M108_Alfred Burian	19	C23:0	2430.3	2.663	-37.15	A		Daph.Chlam (rep 1) 3,41	Chem_C	daphnia	M	-19.29505771		Daphnia_C	magna	140303
142_T95_Alfred Burian	5	C14:0	758	17.957	-28.649	A		Skel 2,5+2,3	algae	diatom	T	-16.6794928		Skeletonema	marinoi	140303
142_T95_Alfred Burian	6	C14:1	831.8	2.153	-27.012	A		Skel 2,5+2,3	algae	diatom	T	-16.6794928		Skeletonema	marinoi	140303
142_T95_Alfred Burian	7	C16:0	1080.9	3.193	-29.6	B		Skel 2,5+2,3	algae	diatom	T	-16.6794928		Skeletonema	marinoi	140303
142_T95_Alfred Burian	8	C16:1w9/7	1169.8	4.962	-33.397	T	1	Skel 2,5+2,3	algae	diatom	T	-16.6794928		Skeletonema	marinoi	140303
142_T95_Alfred Burian		C16:1w5	1191	0.4	-34.08	A		Skel 2,5+2,3	algae	diatom	T	-16.6794928		Skeletonema	marinoi	140303
142_T95_Alfred Burian	9	C17:0	1270.3	1.078	-36.6	A		Skel 2,5+2,3	algae	diatom	T	-16.6794928		Skeletonema	marinoi	140303
142_T95_Alfred Burian	10	C16:2w4	1324.6	1.618	-32.53	A		Skel 2,5+2,3	algae	diatom	T	-16.6794928		Skeletonema	marinoi	140303
142_T95_Alfred Burian		C16:3w4	1359	0.4	-34.23	A		Skel 2,5+2,3	algae	diatom	T	-16.6794928		Skeletonema	marinoi	140303
142_T95_Alfred Burian	11	C16:3w3	1426.4	0.873	-31.672	A		Skel 2,5+2,3	algae	diatom	T	-16.6794928		Skeletonema	marinoi	140303
142_T95_Alfred Burian		C16:4w3	1444	0.5	-37.6	A		Skel 2,5+2,3	algae	diatom	T	-16.6794928		Skeletonema	marinoi	140303
142_T95_Alfred Burian	12	C18:1w7c	1537.4	2.404	-25.9	B		Skel 2,5+2,3	algae	diatom	T	-16.6794928		Skeletonema	marinoi	140303
142_T95_Alfred Burian		C18:4w3	1924	0.7	-38.2	A		Skel 2,5+2,3	algae	diatom	T	-16.6794928		Skeletonema	marinoi	140303
142_T95_Alfred Burian	13	C20:5w3	2271.2	5.08	-33.871	A		Skel 2,5+2,3	algae	diatom	T	-16.6794928		Skeletonema	marinoi	140303
142_T95_Alfred Burian		C22:6w3	2360	0.8	-32.9	A		Skel 2,5+2,3	algae	diatom	T	-16.6794928		Skeletonema	marinoi	140303
145_T104_Alfred Burian	5	C14:0	754.9	3.556	-27.81	A		Achnantes 5.35mg DW	algae	diatom	T	-16.13		Achnantes		140303
145_T104_Alfred Burian	7	C16:0	1091	31.289	-28.5	C		Achnantes 5.35mg DW	algae	diatom	T	-16.13		Achnantes		140303
145_T104_Alfred Burian	8	C16:1w9/7	1177.9	28.985	-31.979	T	1	Achnantes 5.35mg DW	algae	diatom	T	-16.13		Achnantes		140303
145_T104_Alfred Burian	9	C16:2w4	1326.3	2.613	-35.226	A		Achnantes 5.35mg DW	algae	diatom	T	-16.13		Achnantes		140303
145_T104_Alfred Burian	10	C16:3w3	1427.5	1.275	-38.844	A		Achnantes 5.35mg DW	algae	diatom	T	-16.13		Achnantes		140303
145_T104_Alfred Burian		C18:0	1443	0.8	-32.7	A		Achnantes 5.35mg DW	algae	diatom	T	-16.13		Achnantes		140303
145_T104_Alfred Burian		C18:1w7c	1534	0.35	-33.3	C		Achnantes 5.35mg DW	algae	diatom	T	-16.13		Achnantes		140303
145_T104_Alfred Burian		C19:0		0.6		D		Achnantes 5.35mg DW	algae	diatom	T	-16.13		Achnantes		140303
145_T104_Alfred Burian	11	C20:5w3	2271.8	8.387	-33.215	A		Achnantes 5.35mg DW	algae	diatom	T	-16.13		Achnantes		140303
145_T104_Alfred Burian	12	C22:6w3	2547.5	1.417	-31.545	A		Achnantes 5.35mg DW	algae	diatom	T	-16.13		Achnantes		140303
103_T41_Alfred Burian	6	C16:0	1086.6	26.624	-23.828	B		Haem 1.1	algae	green	T	-14.44385996		Haematococcus	pluvialis	140303
103_T41_Alfred Burian	7	C16:1w9/7	1168.1	1.918	-24.576	T	1	Haem 1.1	algae	green	T	-14.44385996		Haematococcus	pluvialis	140303
103_T41_Alfred Burian	8	C16:4w3	1449.6	5.826	-26.911	A		Haem 1.1	algae	green	T	-14.44385996		Haematococcus	pluvialis	140303
103_T41_Alfred Burian	9	C18:1w9c	1518.4	16.794	-29.813	E		Haem 1.1	algae	green	T	-14.44385996		Haematococcus	pluvialis	140303
103_T41_Alfred Burian	10	C18:1w7c	1538.2	2.536	-23.514	E		Haem 1.1	algae	green	T	-14.44385996		Haematococcus	pluvialis	140303
103_T41_Alfred Burian		C18:1w7c/9		19.33	-29.007	T	E	Haem 1.1	algae	green	T	-14.44385996		Haematococcus	pluvialis	140303
103_T41_Alfred Burian	11	C19:0	1636.1	1.442	-40.128	A		Haem 1.1	algae	green	T	-14.44385996		Haematococcus	pluvialis	140303
103_T41_Alfred Burian	12	C18:2w6c	1662.6	8.198	-27.551	A		Haem 1.1	algae	green	T	-14.44385996		Haematococcus	pluvialis	140303
103_T41_Alfred Burian	13	C18:3w6	1756.2	2.041	-29.538	A		Haem 1.1	algae	green	T	-14.44385996		Haematococcus	pluvialis	140303
103_T41_Alfred Burian	14	C18:3w3	1836.1	31.31	-26.476	A		Haem 1.1	algae	green	T	-14.44385996		Haematococcus	pluvialis	140303
103_T41_Alfred Burian	15	C18:4w3	1926.6	3.792	-28.4	A		Haem 1.1	algae	green	T	-14.44385996		Haematococcus	pluvialis	140303
103_T41_Alfred Burian	16	C21:0	1997.4	2.223	-35.548	A		Haem 1.1	algae	green	T	-14.44385996		Haematococcus	pluvialis	140303
103_T41_Alfred Burian	17	C20:3w3+C20:4w6+C22:0	2145.6	2.272	-27.702	A		Haem 1.1	algae	green	T	-14.44385996		Haematococcus	pluvialis	140303
103_T41_Alfred Burian	18	C20:5w3	2269.5	1.138	-28.854	A		Haem 1.1	algae	green	T	-14.44385996		Haematococcus	pluvialis	140303
154_T116_Alfred Burian	6	C16:0	1082.2	14.93	-30.7	C		Chlamy.Chem. 2nd	Chem_C	green	T	-17.62011348		Chlamy_Chem_2nd	reinhardtii	140303	Anabaena	vulgaris
154_T116_Alfred Burian		C16:1w13	1150	0.6	-34.02	A		Chlamy.Chem. 2nd	Chem_C	green	T	-17.62011348		Chlamy_Chem_2nd	reinhardtii	140303	Anabaena	vulgaris
154_T116_Alfred Burian	7	C16:1w9/7	1172.5	1.066	-32.1	T	1	Chlamy.Chem. 2nd	Chem_C	green	T	-17.62011348		Chlamy_Chem_2nd	reinhardtii	140303	Anabaena	vulgaris
154_T116_Alfred Burian	8	C16:4w3	1446.1	1.849	-35.208	A		Chlamy.Chem. 2nd	Chem_C	green	T	-17.62011348		Chlamy_Chem_2nd	reinhardtii	140303	Anabaena	vulgaris
154_T116_Alfred Burian	9	C18:1w9c	1514.2	2.77	-34.025	E		Chlamy.Chem. 2nd	Chem_C	green	T	-17.62011348		Chlamy_Chem_2nd	reinhardtii	140303	Anabaena	vulgaris
154_T116_Alfred Burian	11	C18:1w7c	1536.4	1.739	-28.511	E		Chlamy.Chem. 2nd	Chem_C	green	T	-17.62011348		Chlamy_Chem_2nd	reinhardtii	140303	Anabaena	vulgaris
154_T116_Alfred Burian	11	C18:1w7c/9	1536.4	4.509	-32.1	T	E	Chlamy.Chem. 2nd	Chem_C	green	T	-17.62011348		Chlamy_Chem_2nd	reinhardtii	140303	Anabaena	vulgaris
154_T116_Alfred Burian	12	C19:0	1632.5	1.33	-38.954	A		Chlamy.Chem. 2nd	Chem_C	green	T	-17.62011348		Chlamy_Chem_2nd	reinhardtii	140303	Anabaena	vulgaris
154_T116_Alfred Burian		C18:2w6c	1658	0.75	-35.2	A		Chlamy.Chem. 2nd	Chem_C	green	T	-17.62011348		Chlamy_Chem_2nd	reinhardtii	140303	Anabaena	vulgaris
154_T116_Alfred Burian	13	C18:2w4	1718.4	1.028	-34.955	A		Chlamy.Chem. 2nd	Chem_C	green	T	-17.62011348		Chlamy_Chem_2nd	reinhardtii	140303	Anabaena	vulgaris
154_T116_Alfred Burian	14	C18:3w3	1828.8	6.421	-33.213	A		Chlamy.Chem. 2nd	Chem_C	green	T	-17.62011348		Chlamy_Chem_2nd	reinhardtii	140303	Anabaena	vulgaris
154_T116_Alfred Burian		C20:1w9	1890	0.66	-36.1	A		Chlamy.Chem. 2nd	Chem_C	green	T	-17.62011348		Chlamy_Chem_2nd	reinhardtii	140303	Anabaena	vulgaris
149_T107_Alfred Burian	5	C14:0	755.1	5.488	-30.97	B		Rot. Rhod 5.1 + 5.2	Chem_R	Rotifer	T	-20.28649416		Brach_R	plicatilis	140303
149_T107_Alfred Burian	7	C16:0	1083.5	13.915	-33.106	B		Rot. Rhod 5.1 + 5.2	Chem_R	Rotifer	T	-20.28649416		Brach_R	plicatilis	140303
149_T107_Alfred Burian	8	C16:1w9/7	1167.9	2.511	-33.366	T	1	Rot. Rhod 5.1 + 5.2	Chem_R	Rotifer	T	-20.28649416		Brach_R	plicatilis	140303
149_T107_Alfred Burian		C17:0	1258	0.48	-37.9	B		Rot. Rhod 5.1 + 5.2	Chem_R	Rotifer	T	-20.28649416		Brach_R	plicatilis	140303
149_T107_Alfred Burian	9	C18:0	1449.4	4.222	-34.249	A		Rot. Rhod 5.1 + 5.2	Chem_R	Rotifer	T	-20.28649416		Brach_R	plicatilis	140303
149_T107_Alfred Burian	10	C18:1w9t	1489.1	1.441	-35.915	A		Rot. Rhod 5.1 + 5.2	Chem_R	Rotifer	T	-20.28649416		Brach_R	plicatilis	140303
149_T107_Alfred Burian		C18:1w9c	1520	0.5	-28.8	A		Rot. Rhod 5.1 + 5.2	Chem_R	Rotifer	T	-20.28649416		Brach_R	plicatilis	140303
149_T107_Alfred Burian	11	C18:1w7c	1538.9	2.662	-32.077	A		Rot. Rhod 5.1 + 5.2	Chem_R	Rotifer	T	-20.28649416		Brach_R	plicatilis	140303
149_T107_Alfred Burian	12	C18:2w6c	1659.7	2.349	-35.929	A		Rot. Rhod 5.1 + 5.2	Chem_R	Rotifer	T	-20.28649416		Brach_R	plicatilis	140303
149_T107_Alfred Burian	13	C18:3w3	1832.9	17.57	-37.181	A		Rot. Rhod 5.1 + 5.2	Chem_R	Rotifer	T	-20.28649416		Brach_R	plicatilis	140303
149_T107_Alfred Burian		C20:1w9	1893	0.6	-31.6	A		Rot. Rhod 5.1 + 5.2	Chem_R	Rotifer	T	-20.28649416		Brach_R	plicatilis	140303
149_T107_Alfred Burian	14	C18:4w3	1928	8.127	-35.3	A		Rot. Rhod 5.1 + 5.2	Chem_R	Rotifer	T	-20.28649416		Brach_R	plicatilis	140303
149_T107_Alfred Burian	15	C20:3w3+C20:4w6+C22:0	2151.2	3.261	-34.089	B		Rot. Rhod 5.1 + 5.2	Chem_R	Rotifer	T	-20.28649416		Brach_R	plicatilis	140303
149_T107_Alfred Burian	16	C20:4w3	2225	17.065	-34.9	A		Rot. Rhod 5.1 + 5.2	Chem_R	Rotifer	T	-20.28649416		Brach_R	plicatilis	140303
149_T107_Alfred Burian	17	C20:5w3	2273.7	14.357	-35.295	A		Rot. Rhod 5.1 + 5.2	Chem_R	Rotifer	T	-20.28649416		Brach_R	plicatilis	140303
149_T107_Alfred Burian	18	C22:5w3	2508	4.739	-35.331	A		Rot. Rhod 5.1 + 5.2	Chem_R	Rotifer	T	-20.28649416		Brach_R	plicatilis	140303
149_T107_Alfred Burian	19	C22:6w3	2550	9.24	-33.648	A		Rot. Rhod 5.1 + 5.2	Chem_R	Rotifer	T	-20.28649416		Brach_R	plicatilis	140303
156_T93_Alfred Burian	5	C14:0	755.1	5.443	-28.654	A		Spirulina A3	algae	cyano	T	-16.11567872		Spirulina	magna	140303
156_T93_Alfred Burian	7	C16:0	1079.9	2.551	-30.7	A		Spirulina A3	algae	cyano	T	-16.11567872		Spirulina	magna	140303
156_T93_Alfred Burian	8	C16:1w13	1152.4	6.218	-33.507	A		Spirulina A3	algae	cyano	T	-16.11567872		Spirulina	magna	140303
156_T93_Alfred Burian		C18:0	1443	0.6	-33.6	A		Spirulina A3	algae	cyano	T	-16.11567872		Spirulina	magna	140303
156_T93_Alfred Burian	9	C18:1w9c	1519.2	1.414	-33.52	A		Spirulina A3	algae	cyano	T	-16.11567872		Spirulina	magna	140303
156_T93_Alfred Burian		C18:1w7c	1534	0.4	-31.63	A		Spirulina A3	algae	cyano	T	-16.11567872		Spirulina	magna	140303
156_T93_Alfred Burian	10	C19:0	1631.5	1.072	-38.091	A		Spirulina A3	algae	cyano	T	-16.11567872		Spirulina	magna	140303
156_T93_Alfred Burian	11	C21:0	1996.4	0.992	-34.128	A		Spirulina A3	algae	cyano	T	-16.11567872		Spirulina	magna	140303
146_T105_wrong label!! Alfred Burian	5	C14:0	753.7	2.441	-27.317	F	A	Rot. Rhod 3.1 +3.2	Chem_R	Rotifer	T	-19.99705703		Brach_R	plicatilis	140304
146_T105_wrong label!! Alfred Burian	7	C16:0	1086.4	31.909	-27.754	F	A	Rot. Rhod 3.1 +3.2	Chem_R	Rotifer	T	-19.99705703		Brach_R	plicatilis	140304
146_T105_wrong label!! Alfred Burian	8	C16:1w9/7	1167.9	5.696	-28.398	F	A	Rot. Rhod 3.1 +3.2	Chem_R	Rotifer	T	-19.99705703		Brach_R	plicatilis	140304
146_T105_wrong label!! Alfred Burian	9	C17:0	1260.1	5.542	-34.349	F	A	Rot. Rhod 3.1 +3.2	Chem_R	Rotifer	T	-19.99705703		Brach_R	plicatilis	140304
146_T105_wrong label!! Alfred Burian	10	C16:3w3	1406.2	4.63	-30.113	F	A	Rot. Rhod 3.1 +3.2	Chem_R	Rotifer	T	-19.99705703		Brach_R	plicatilis	140304
146_T105_wrong label!! Alfred Burian	11	C18:0	1451.1	6.301	-29.016	F	A	Rot. Rhod 3.1 +3.2	Chem_R	Rotifer	T	-19.99705703		Brach_R	plicatilis	140304
146_T105_wrong label!! Alfred Burian	12	C18:1w9t	1490.6	6.805	-29.1	F	A	Rot. Rhod 3.1 +3.2	Chem_R	Rotifer	T	-19.99705703		Brach_R	plicatilis	140304
146_T105_wrong label!! Alfred Burian	13	C18:1w9c	1521.5	2.95	-29.7	F	B	Rot. Rhod 3.1 +3.2	Chem_R	Rotifer	T	-19.99705703		Brach_R	plicatilis	140304
146_T105_wrong label!! Alfred Burian	14	C18:1w7c	1539.1	4.247	-27.4	F	A	Rot. Rhod 3.1 +3.2	Chem_R	Rotifer	T	-19.99705703		Brach_R	plicatilis	140304
146_T105_wrong label!! Alfred Burian	15	C18:1w5	1590.7	2.225	-29.809	F	A	Rot. Rhod 3.1 +3.2	Chem_R	Rotifer	T	-19.99705703		Brach_R	plicatilis	140304
146_T105_wrong label!! Alfred Burian	16	C19:0	1638.3	2.54	-31.583	C	E	Rot. Rhod 3.1 +3.2	Chem_R	Rotifer	T	-19.99705703		Brach_R	plicatilis	140304
146_T105_wrong label!! Alfred Burian	17	C18:2w6c	1663.4	16.111	-28.665	F	E	Rot. Rhod 3.1 +3.2	Chem_R	Rotifer	T	-19.99705703		Brach_R	plicatilis	140304
146_T105_wrong label!! Alfred Burian	18	C18:2w4	1719.7	1.932	-28.7	F	A	Rot. Rhod 3.1 +3.2	Chem_R	Rotifer	T	-19.99705703		Brach_R	plicatilis	140304
146_T105_wrong label!! Alfred Burian	19	C18:3w6	1755.8	3.935	-33.85	F	A	Rot. Rhod 3.1 +3.2	Chem_R	Rotifer	T	-19.99705703		Brach_R	plicatilis	140304
146_T105_wrong label!! Alfred Burian	20	C18:3w3	1831.3	21.348	-28.425	F	A	Rot. Rhod 3.1 +3.2	Chem_R	Rotifer	T	-19.99705703		Brach_R	plicatilis	140304
146_T105_wrong label!! Alfred Burian	21	?	1882.7	5.133	-31.32	F	E	Rot. Rhod 3.1 +3.2	Chem_R	Rotifer	T	-19.99705703		Brach_R	plicatilis	140304
146_T105_wrong label!! Alfred Burian	22	C20:1w9	1895	3.782	-29.123	F	E	Rot. Rhod 3.1 +3.2	Chem_R	Rotifer	T	-19.99705703		Brach_R	plicatilis	140304
146_T105_wrong label!! Alfred Burian	23	?	1913.2	1.665	-28.246	F	B	Rot. Rhod 3.1 +3.2	Chem_R	Rotifer	T	-19.99705703		Brach_R	plicatilis	140304
[truncated: 1,286 more rows]
